# Supplementary material for: Projected impacts of climate change on functional diversity of frugivorous birds along a tropical elevational gradient
Source: Springer Nature journal article supplement (doi:10.1038/s41598-019-53409-6), 2019-11-27
Supplement: MOESM1 [file 41598_2019_53409_MOESM1_ESM.pdf]

## Supporting Information

Irene M.A. Bender, W. Daniel Kissling, Katrin Böhning-Gaese, Isabell Hensen, Ingolf Kühn, Larissa Nowak, Till Töpfer, Thorsten Wiegand, D. Matthias Dehling and Matthias Schleuning. **Projected impacts of climate change on functional diversity of frugivorous birds along a tropical elevational gradient.**

**Table S1.** Current and future elevational ranges of all 232 frugivorous bird species.

**Table S2.** Current and future probabilities of occurrence derived from SDMs for all 232 frugivorous bird species.

**Table S3.** Current and future assemblage composition at all seven elevational levels, including probabilities of occurrence. Based on the MIROC5 climate model, RCP 6.0.

**Table S4.** Current and future assemblage composition at all seven elevational levels, including probabilities of occurrence. Based on the MIROC5 climate model, RCP 8.5.

**Table S5.** Model evaluation metrics for each bird species and SDM algorithm.

**Table S6.** Pearson's correlation coefficients between morphological traits.

**Figure S1.** Species richness and functional dispersion under current conditions along the forested part of an elevational gradient in the Peruvian Andes.

**Figure S2.** Potential changes in functional dispersion of bird assemblages under projected future climate change, RCP 6.0.

**Figure S3.** Projected changes in functional trait spaces of frugivorous birds under climate change assuming a *range contraction scenario*, RCP 8.5.

**Figure S4.** Projected changes in functional trait spaces of frugivorous birds under climate change assuming a *range expansion scenario*, RCP 8.5.

**Figure S5.** Projected changes in functional trait spaces of frugivorous birds under climate change assuming a *range shift scenario*, RCP 8.5.

**Table S1.** Current and future elevational ranges of all 232 frugivorous bird species of the Manú Biosphere Reserve, Peru, based on the MIROC5 climate model. Current elevational ranges and bird taxonomy are derived from Dehling *et al.* (2014). Future elevational ranges were projected based on vertical distance movements of each bird species based on future temperature scenarios and tropospheric lapse-rates. Future temperature scenarios were based on two representative concentration pathways RCP 6.0 and RCP 8.5. Future elevational ranges were applied to three of the potential migration scenarios: *range contraction* (where the lower range limit moves upwards), *range expansion* (where the upper range limit moves upwards), and *range shift* where both the lower and upper range limit move upwards.

| Family       | Bird species                       | Current |      | Range expansion |         |      | Range contraction |         |      | Range shift |      |         |      |
|--------------|------------------------------------|---------|------|-----------------|---------|------|-------------------|---------|------|-------------|------|---------|------|
|              |                                    | min     | max  | RCP 6.0         | RCP 8.5 | max  | RCP 6.0           | RCP 8.5 | max  | RCP 6.0     |      | RCP 8.5 |      |
|              |                                    | min     | max  | min             | max     | max  | min               | min     | max  | min         | max  | min     | max  |
| Cardinalidae | <i>Cyanocompsa cyanooides</i>      | 250     | 1400 | 250             | 1786    | 1953 | 636               | 803     | 1400 | 636         | 1786 | 803     | 1953 |
| Cardinalidae | <i>Pheucticus aureoventris</i>     | 600     | 3250 | 600             | 3622    | 3774 | 972               | 1124    | 3250 | 972         | 3622 | 1124    | 3774 |
| Cardinalidae | <i>Pheucticus chrysogaster</i>     | 650     | 3500 | 650             | 3869    | 4023 | 1019              | 1173    | 3500 | 1019        | 3869 | 1173    | 4023 |
| Cardinalidae | <i>Saltator aurantirostris</i>     | 2600    | 3500 | 2600            | 3864    | 4026 | 2964              | 3126    | 3500 | 2964        | 3864 | 3126    | 4026 |
| Cardinalidae | <i>Saltator coerulescens</i>       | 250     | 900  | 250             | 1294    | 1463 | 644               | 813     | 900  | 644         | 1294 | 813     | 1463 |
| Cardinalidae | <i>Saltator grossus</i>            | 250     | 1006 | 250             | 1392    | 1559 | 636               | 803     | 1006 | 636         | 1392 | 803     | 1559 |
| Cardinalidae | <i>Saltator maximus</i>            | 250     | 2507 | 250             | 2886    | 3042 | 629               | 785     | 2507 | 629         | 2886 | 785     | 3042 |
| Columbidae   | <i>Geotrygon montana</i>           | 250     | 1489 | 250             | 1875    | 2042 | 636               | 803     | 1489 | 636         | 1875 | 803     | 2042 |
| Columbidae   | <i>Patagioenas cayennensis</i>     | 250     | 900  | 250             | 1294    | 1463 | 644               | 813     | 900  | 644         | 1294 | 813     | 1463 |
| Columbidae   | <i>Patagioenas fasciata</i>        | 1200    | 3530 | 1200            | 3899    | 4051 | 1569              | 1721    | 3530 | 1569        | 3899 | 1721    | 4051 |
| Columbidae   | <i>Patagioenas plumbea</i>         | 250     | 1991 | 250             | 2374    | 2535 | 633               | 794     | 1991 | 633         | 2374 | 794     | 2535 |
| Columbidae   | <i>Patagioenas subvinacea</i>      | 250     | 1550 | 250             | 1933    | 2094 | 633               | 794     | 1550 | 633         | 1933 | 794     | 2094 |
| Corvidae     | <i>Cyanocorax cyanomelas</i>       | 250     | 1100 | 250             | 1486    | 1653 | 636               | 803     | 1100 | 636         | 1486 | 803     | 1653 |
| Corvidae     | <i>Cyanocorax violaceus</i>        | 250     | 1400 | 250             | 1786    | 1953 | 636               | 803     | 1400 | 636         | 1786 | 803     | 1953 |
| Corvidae     | <i>Cyanocorax yncas</i>            | 1150    | 2200 | 1150            | 2572    | 2718 | 1522              | 1668    | 2200 | 1522        | 2572 | 1668    | 2718 |
| Cotingidae   | <i>Ampelioides tschudii</i>        | 700     | 1400 | 700             | 1771    | 1932 | 1071              | 1232    | 1400 | 1071        | 1771 | 1232    | 1932 |
| Cotingidae   | <i>Ampelion rubrocristatus</i>     | 2500    | 3450 | 2500            | 3822    | 3976 | 2872              | 3026    | 3450 | 2872        | 3822 | 3026    | 3976 |
| Cotingidae   | <i>Ampelion rufaxilla</i>          | 1600    | 2850 | 1600            | 3222    | 3368 | 1972              | 2118    | 2850 | 1972        | 3222 | 2118    | 3368 |
| Cotingidae   | <i>Cephalopterus ornatus</i>       | 250     | 1650 | 250             | 2033    | 2194 | 633               | 794     | 1650 | 633         | 2033 | 794     | 2194 |
| Cotingidae   | <i>Conioptilon mcilhennyi</i>      | 250     | 450  | 250             | 852     | 1029 | 652               | 829     | 450  | 652         | 852  | 829     | 1029 |
| Cotingidae   | <i>Cotinga cayana</i>              | 250     | 800  | 250             | 1194    | 1363 | 644               | 813     | 800  | 644         | 1194 | 813     | 1363 |
| Cotingidae   | <i>Cotinga maynana</i>             | 250     | 1000 | 250             | 1386    | 1553 | 636               | 803     | 1000 | 636         | 1386 | 803     | 1553 |
| Cotingidae   | <i>Gymnoderus foetidus</i>         | 250     | 500  | 250             | 894     | 1063 | 644               | 813     | 500  | 644         | 894  | 813     | 1063 |
| Cotingidae   | <i>Iodopleura isabellae</i>        | 250     | 850  | 250             | 1244    | 1413 | 644               | 813     | 850  | 644         | 1244 | 813     | 1413 |
| Cotingidae   | <i>Laniocera hypopyrra</i>         | 250     | 750  | 250             | 1144    | 1313 | 644               | 813     | 750  | 644         | 1144 | 813     | 1313 |
| Cotingidae   | <i>Lipaugus vociferans</i>         | 250     | 800  | 250             | 1194    | 1363 | 644               | 813     | 800  | 644         | 1194 | 813     | 1363 |
| Cotingidae   | <i>Oxyruncus cristatus</i>         | 850     | 1300 | 850             | 1671    | 1832 | 1221              | 1382    | 1300 | 1221        | 1671 | 1382    | 1832 |
| Cotingidae   | <i>Pipreola arcuata</i>            | 1821    | 3650 | 1821            | 4018    | 4172 | 2189              | 2343    | 3650 | 2189        | 4018 | 2343    | 4172 |
| Cotingidae   | <i>Pipreola frontalis</i>          | 1000    | 1780 | 1000            | 2151    | 2305 | 1371              | 1525    | 1780 | 1371        | 2151 | 1525    | 2305 |
| Cotingidae   | <i>Pipreola intermedia</i>         | 1459    | 3101 | 1459            | 3473    | 3623 | 1831              | 1981    | 3101 | 1831        | 3473 | 1981    | 3623 |
| Cotingidae   | <i>Porphyrolaema porphyrolaema</i> | 250     | 450  | 250             | 852     | 1029 | 652               | 829     | 450  | 652         | 852  | 829     | 1029 |
| Cotingidae   | <i>Querula purpurata</i>           | 250     | 1050 | 250             | 1436    | 1603 | 636               | 803     | 1050 | 636         | 1436 | 803     | 1603 |
| Cotingidae   | <i>Rupicola peruvianus</i>         | 650     | 2800 | 650             | 3172    | 3321 | 1022              | 1171    | 2800 | 1022        | 3172 | 1171    | 3321 |
| Cotingidae   | <i>Snowornis subalaris</i>         | 850     | 1350 | 850             | 1721    | 1882 | 1221              | 1382    | 1350 | 1221        | 1721 | 1382    | 1882 |
| Cotingidae   | <i>Tityra cayana</i>               | 250     | 450  | 250             | 852     | 1029 | 652               | 829     | 450  | 652         | 852  | 829     | 1029 |
| Cotingidae   | <i>Tityra inquisitor</i>           | 250     | 670  | 250             | 1064    | 1233 | 644               | 813     | 670  | 644         | 1064 | 813     | 1233 |
| Cotingidae   | <i>Tityra semifasciata</i>         | 250     | 1500 | 250             | 1883    | 2044 | 633               | 794     | 1500 | 633         | 1883 | 794     | 2044 |
| Cracidae     | <i>Aburria aburri</i>              | 650     | 1948 | 650             | 2319    | 2473 | 1021              | 1175    | 1948 | 1021        | 2319 | 1175    | 2473 |

|                |                                    |      |      |      |      |      |      |      |      |      |      |      |      |
|----------------|------------------------------------|------|------|------|------|------|------|------|------|------|------|------|------|
| Cracidae       | <i>Mitu tuberosum</i>              | 250  | 1000 | 250  | 1386 | 1553 | 636  | 803  | 1000 | 636  | 1386 | 803  | 1553 |
| Cracidae       | <i>Ortalis guttata</i>             | 250  | 1600 | 250  | 1983 | 2144 | 633  | 794  | 1600 | 633  | 1983 | 794  | 2144 |
| Cracidae       | <i>Penelope jacquacu</i>           | 250  | 1500 | 250  | 1883 | 2044 | 633  | 794  | 1500 | 633  | 1883 | 794  | 2044 |
| Cracidae       | <i>Penelope montagnii</i>          | 900  | 3200 | 900  | 3572 | 3724 | 1272 | 1424 | 3200 | 1272 | 3572 | 1424 | 3724 |
| Cracidae       | <i>Pipile cumanensis</i>           | 250  | 500  | 250  | 894  | 1063 | 644  | 813  | 500  | 644  | 894  | 813  | 1063 |
| Icteridae      | <i>Cacicus cela</i>                | 250  | 1050 | 250  | 1436 | 1603 | 636  | 803  | 1050 | 636  | 1436 | 803  | 1603 |
| Icteridae      | <i>Cacicus chrysonotus</i>         | 2010 | 3342 | 2010 | 3714 | 3868 | 2382 | 2536 | 3342 | 2382 | 3714 | 2536 | 3868 |
| Icteridae      | <i>Cacicus haemorrhous</i>         | 250  | 1000 | 250  | 1386 | 1553 | 636  | 803  | 1000 | 636  | 1386 | 803  | 1553 |
| Icteridae      | <i>Clypicterus oseryi</i>          | 250  | 800  | 250  | 1194 | 1363 | 644  | 813  | 800  | 644  | 1194 | 813  | 1363 |
| Icteridae      | <i>Icterus icterus</i>             | 250  | 800  | 250  | 1194 | 1363 | 644  | 813  | 800  | 644  | 1194 | 813  | 1363 |
| Icteridae      | <i>Molothrus oryzivorus</i>        | 250  | 800  | 250  | 1194 | 1363 | 644  | 813  | 800  | 644  | 1194 | 813  | 1363 |
| Icteridae      | <i>Psarocolius angustifrons</i>    | 250  | 2083 | 250  | 2464 | 2622 | 631  | 789  | 2083 | 631  | 2464 | 789  | 2622 |
| Icteridae      | <i>Psarocolius atrovirens</i>      | 983  | 2750 | 983  | 3122 | 3271 | 1355 | 1504 | 2750 | 1355 | 3122 | 1504 | 3271 |
| Icteridae      | <i>Psarocolius bifasciatus</i>     | 250  | 970  | 250  | 1364 | 1533 | 644  | 813  | 970  | 644  | 1364 | 813  | 1533 |
| Icteridae      | <i>Psarocolius decumanus</i>       | 250  | 1320 | 250  | 1706 | 1873 | 636  | 803  | 1320 | 636  | 1706 | 803  | 1873 |
| Odontophoridae | <i>Odontophorus balliviani</i>     | 800  | 3100 | 800  | 3472 | 3624 | 1172 | 1324 | 3100 | 1172 | 3472 | 1324 | 3624 |
| Odontophoridae | <i>Odontophorus speciosus</i>      | 1000 | 2100 | 1000 | 2472 | 2622 | 1372 | 1522 | 2100 | 1372 | 2472 | 1522 | 2622 |
| Odontophoridae | <i>Odontophorus stellatus</i>      | 250  | 1050 | 250  | 1436 | 1603 | 636  | 803  | 1050 | 636  | 1436 | 803  | 1603 |
| Picidae        | <i>Celeus elegans</i>              | 250  | 500  | 250  | 894  | 1063 | 644  | 813  | 500  | 644  | 894  | 813  | 1063 |
| Picidae        | <i>Celeus flavus</i>               | 250  | 500  | 250  | 894  | 1063 | 644  | 813  | 500  | 644  | 894  | 813  | 1063 |
| Picidae        | <i>Celeus grammicus</i>            | 250  | 1200 | 250  | 1586 | 1753 | 636  | 803  | 1200 | 636  | 1586 | 803  | 1753 |
| Picidae        | <i>Celeus spectabilis</i>          | 250  | 500  | 250  | 894  | 1063 | 644  | 813  | 500  | 644  | 894  | 813  | 1063 |
| Picidae        | <i>Celeus torquatus</i>            | 250  | 500  | 250  | 894  | 1063 | 644  | 813  | 500  | 644  | 894  | 813  | 1063 |
| Picidae        | <i>Colaptes rubiginosus</i>        | 750  | 2010 | 750  | 2382 | 2532 | 1122 | 1272 | 2010 | 1122 | 2382 | 1272 | 2532 |
| Pipridae       | <i>Chiroxiphia boliviana</i>       | 950  | 2033 | 950  | 2405 | 2555 | 1322 | 1472 | 2033 | 1322 | 2405 | 1472 | 2555 |
| Pipridae       | <i>Chiroxiphia pareola</i>         | 250  | 700  | 250  | 1094 | 1263 | 644  | 813  | 700  | 644  | 1094 | 813  | 1263 |
| Pipridae       | <i>Lepidothrix coeruleocapilla</i> | 797  | 1709 | 797  | 2080 | 2234 | 1168 | 1322 | 1709 | 1168 | 2080 | 1322 | 2234 |
| Pipridae       | <i>Lepidothrix coronata</i>        | 250  | 900  | 250  | 1294 | 1463 | 644  | 813  | 900  | 644  | 1294 | 813  | 1463 |
| Pipridae       | <i>Machaeropterus pyrocephalus</i> | 250  | 1429 | 250  | 1815 | 1982 | 636  | 803  | 1429 | 636  | 1815 | 803  | 1982 |
| Pipridae       | <i>Manacus manacus</i>             | 450  | 975  | 450  | 1362 | 1523 | 837  | 998  | 975  | 837  | 1362 | 998  | 1523 |
| Pipridae       | <i>Neopelma sulphureiventer</i>    | 250  | 500  | 250  | 894  | 1063 | 644  | 813  | 500  | 644  | 894  | 813  | 1063 |
| Pipridae       | <i>Pipra chloromeros</i>           | 250  | 1400 | 250  | 1786 | 1953 | 636  | 803  | 1400 | 636  | 1786 | 803  | 1953 |
| Pipridae       | <i>Pipra fasciicauda</i>           | 250  | 1055 | 250  | 1441 | 1608 | 636  | 803  | 1055 | 636  | 1441 | 803  | 1608 |
| Pipridae       | <i>Xenopipo holochlora</i>         | 450  | 1100 | 450  | 1479 | 1640 | 829  | 990  | 1100 | 829  | 1479 | 990  | 1640 |
| Pipridae       | <i>Xenopipo unicolor</i>           | 1000 | 1800 | 1000 | 2171 | 2325 | 1371 | 1525 | 1800 | 1371 | 2171 | 1525 | 2325 |
| Psittacidae    | <i>Amazona farinosa</i>            | 250  | 1350 | 250  | 1736 | 1903 | 636  | 803  | 1350 | 636  | 1736 | 803  | 1903 |
| Psittacidae    | <i>Amazona mercenaria</i>          | 826  | 3100 | 826  | 3472 | 3624 | 1198 | 1350 | 3100 | 1198 | 3472 | 1350 | 3624 |
| Psittacidae    | <i>Amazona ochrocephala</i>        | 250  | 850  | 250  | 1244 | 1413 | 644  | 813  | 850  | 644  | 1244 | 813  | 1413 |
| Psittacidae    | <i>Ara ararauna</i>                | 250  | 1000 | 250  | 1386 | 1553 | 636  | 803  | 1000 | 636  | 1386 | 803  | 1553 |
| Psittacidae    | <i>Ara chloropterus</i>            | 250  | 1390 | 250  | 1776 | 1943 | 636  | 803  | 1390 | 636  | 1776 | 803  | 1943 |
| Psittacidae    | <i>Ara macao</i>                   | 250  | 1000 | 250  | 1386 | 1553 | 636  | 803  | 1000 | 636  | 1386 | 803  | 1553 |
| Psittacidae    | <i>Ara militaris</i>               | 600  | 1716 | 600  | 2087 | 2241 | 971  | 1125 | 1716 | 971  | 2087 | 1125 | 2241 |
| Psittacidae    | <i>Ara severus</i>                 | 250  | 1236 | 250  | 1622 | 1789 | 636  | 803  | 1236 | 636  | 1622 | 803  | 1789 |
| Psittacidae    | <i>Aratinga leucophthalma</i>      | 250  | 1650 | 250  | 2033 | 2194 | 633  | 794  | 1650 | 633  | 2033 | 794  | 2194 |
| Psittacidae    | <i>Aratinga mitrata</i>            | 1621 | 3414 | 1621 | 3786 | 3937 | 1993 | 2144 | 3414 | 1993 | 3786 | 2144 | 3937 |
| Psittacidae    | <i>Aratinga weddellii</i>          | 250  | 700  | 250  | 1094 | 1263 | 644  | 813  | 700  | 644  | 1094 | 813  | 1263 |
| Psittacidae    | <i>Bolborhynchus lineola</i>       | 1100 | 3383 | 1100 | 3755 | 3905 | 1472 | 1622 | 3383 | 1472 | 3755 | 1622 | 3905 |
| Psittacidae    | <i>Bolborhynchus orbygnesi</i>     | 2500 | 3500 | 2500 | 3867 | 4023 | 2867 | 3023 | 3500 | 2867 | 3867 | 3023 | 4023 |
| Psittacidae    | <i>Brotogeris cyanoptera</i>       | 250  | 500  | 250  | 894  | 1063 | 644  | 813  | 500  | 644  | 894  | 813  | 1063 |
| Psittacidae    | <i>Brotogeris sanctithomae</i>     | 250  | 500  | 250  | 894  | 1063 | 644  | 813  | 500  | 644  | 894  | 813  | 1063 |

|                 |                                       |      |      |      |      |      |      |      |      |      |      |      |      |
|-----------------|---------------------------------------|------|------|------|------|------|------|------|------|------|------|------|------|
| Psittacidae     | <i>Forpus modestus</i>                | 250  | 500  | 250  | 894  | 1063 | 644  | 813  | 500  | 644  | 894  | 813  | 1063 |
| Psittacidae     | <i>Nannopsittaca dachilleae</i>       | 250  | 1088 | 250  | 1474 | 1641 | 636  | 803  | 1088 | 636  | 1474 | 803  | 1641 |
| Psittacidae     | <i>Orthopsittaca manilata</i>         | 250  | 650  | 250  | 1044 | 1213 | 644  | 813  | 650  | 644  | 1044 | 813  | 1213 |
| Psittacidae     | <i>Pionites leucogaster</i>           | 250  | 500  | 250  | 894  | 1063 | 644  | 813  | 500  | 644  | 894  | 813  | 1063 |
| Psittacidae     | <i>Pionus menstruus</i>               | 250  | 2383 | 250  | 2764 | 2922 | 631  | 789  | 2383 | 631  | 2764 | 789  | 2922 |
| Psittacidae     | <i>Pionus tumultuosus</i>             | 1100 | 3032 | 1100 | 3404 | 3554 | 1472 | 1622 | 3032 | 1472 | 3404 | 1622 | 3554 |
| Psittacidae     | <i>Primolius couloni</i>              | 250  | 1300 | 250  | 1686 | 1853 | 636  | 803  | 1300 | 636  | 1686 | 803  | 1853 |
| Psittacidae     | <i>Pyrilia barrabandi</i>             | 250  | 500  | 250  | 894  | 1063 | 644  | 813  | 500  | 644  | 894  | 813  | 1063 |
| Psittacidae     | <i>Pyrrhura roseifrons</i>            | 250  | 1000 | 250  | 1386 | 1553 | 636  | 803  | 1000 | 636  | 1386 | 803  | 1553 |
| Psittacidae     | <i>Pyrrhura rupicola</i>              | 250  | 1100 | 250  | 1486 | 1653 | 636  | 803  | 1100 | 636  | 1486 | 803  | 1653 |
| Psittacidae     | <i>Touit huetii</i>                   | 300  | 1300 | 300  | 1679 | 1840 | 679  | 840  | 1300 | 679  | 1679 | 840  | 1840 |
| Psophiidae      | <i>Psophia leucoptera</i>             | 250  | 1050 | 250  | 1436 | 1603 | 636  | 803  | 1050 | 636  | 1436 | 803  | 1603 |
| Ramphastidae    | <i>Andigena hypoglauca</i>            | 1450 | 3500 | 1450 | 3869 | 4021 | 1819 | 1971 | 3500 | 1819 | 3869 | 1971 | 4021 |
| Ramphastidae    | <i>Aulacorhynchus coeruleicinctis</i> | 1059 | 2937 | 1059 | 3309 | 3455 | 1431 | 1577 | 2937 | 1431 | 3309 | 1577 | 3455 |
| Ramphastidae    | <i>Aulacorhynchus derbianus</i>       | 800  | 1852 | 800  | 2223 | 2377 | 1171 | 1325 | 1852 | 1171 | 2223 | 1325 | 2377 |
| Ramphastidae    | <i>Aulacorhynchus prasinus</i>        | 250  | 1500 | 250  | 1883 | 2044 | 633  | 794  | 1500 | 633  | 1883 | 794  | 2044 |
| Ramphastidae    | <i>Capito auratus</i>                 | 250  | 1350 | 250  | 1736 | 1903 | 636  | 803  | 1350 | 636  | 1736 | 803  | 1903 |
| Ramphastidae    | <i>Eubucco richardsoni</i>            | 250  | 1000 | 250  | 1386 | 1553 | 636  | 803  | 1000 | 636  | 1386 | 803  | 1553 |
| Ramphastidae    | <i>Eubucco tucinkae</i>               | 250  | 800  | 250  | 1194 | 1363 | 644  | 813  | 800  | 644  | 1194 | 813  | 1363 |
| Ramphastidae    | <i>Eubucco versicolor</i>             | 750  | 2130 | 750  | 2502 | 2652 | 1122 | 1272 | 2130 | 1122 | 2502 | 1272 | 2652 |
| Ramphastidae    | <i>Pteroglossus azara</i>             | 250  | 1200 | 250  | 1586 | 1753 | 636  | 803  | 1200 | 636  | 1586 | 803  | 1753 |
| Ramphastidae    | <i>Pteroglossus beauharnaesii</i>     | 250  | 951  | 250  | 1345 | 1514 | 644  | 813  | 951  | 644  | 1345 | 813  | 1514 |
| Ramphastidae    | <i>Pteroglossus castanotis</i>        | 250  | 1000 | 250  | 1386 | 1553 | 636  | 803  | 1000 | 636  | 1386 | 803  | 1553 |
| Ramphastidae    | <i>Pteroglossus inscriptus</i>        | 250  | 500  | 250  | 894  | 1063 | 644  | 813  | 500  | 644  | 894  | 813  | 1063 |
| Ramphastidae    | <i>Ramphastos tucanus</i>             | 250  | 876  | 250  | 1270 | 1439 | 644  | 813  | 876  | 644  | 1270 | 813  | 1439 |
| Ramphastidae    | <i>Ramphastos vitellinus</i>          | 250  | 600  | 250  | 994  | 1163 | 644  | 813  | 600  | 644  | 994  | 813  | 1163 |
| Ramphastidae    | <i>Selenidera reinwardtii</i>         | 250  | 1682 | 250  | 2065 | 2226 | 633  | 794  | 1682 | 633  | 2065 | 794  | 2226 |
| Steatornithidae | <i>Steatornis caripensis</i>          | 450  | 900  | 450  | 1287 | 1448 | 837  | 998  | 900  | 837  | 1287 | 998  | 1448 |
| Thraupidae      | <i>Anisognathus igniventris</i>       | 2525 | 3600 | 2525 | 3964 | 4126 | 2889 | 3051 | 3600 | 2889 | 3964 | 3051 | 4126 |
| Thraupidae      | <i>Anisognathus somptuosus</i>        | 1375 | 3000 | 1375 | 3372 | 3522 | 1747 | 1897 | 3000 | 1747 | 3372 | 1897 | 3522 |
| Thraupidae      | <i>Buthraupis montana</i>             | 2312 | 3250 | 2312 | 3622 | 3776 | 2684 | 2838 | 3250 | 2684 | 3622 | 2838 | 3776 |
| Thraupidae      | <i>Catamblyrhynchus diadema</i>       | 2000 | 3250 | 2000 | 3622 | 3773 | 2372 | 2523 | 3250 | 2372 | 3622 | 2523 | 3773 |
| Thraupidae      | <i>Chlorochrysa calliparaea</i>       | 1000 | 2200 | 1000 | 2572 | 2722 | 1372 | 1522 | 2200 | 1372 | 2572 | 1522 | 2722 |
| Thraupidae      | <i>Chlorophanes spiza</i>             | 250  | 1430 | 250  | 1816 | 1983 | 636  | 803  | 1430 | 636  | 1816 | 803  | 1983 |
| Thraupidae      | <i>Chlorophonia cyanea</i>            | 250  | 2115 | 250  | 2496 | 2654 | 631  | 789  | 2115 | 631  | 2496 | 789  | 2654 |
| Thraupidae      | <i>Chlorornis riefferii</i>           | 2100 | 3215 | 2100 | 3587 | 3741 | 2472 | 2626 | 3215 | 2472 | 3587 | 2626 | 3741 |
| Thraupidae      | <i>Chlorospingus canigularis</i>      | 1000 | 1600 | 1000 | 1971 | 2125 | 1371 | 1525 | 1600 | 1371 | 1971 | 1525 | 2125 |
| Thraupidae      | <i>Chlorospingus flavigularis</i>     | 800  | 2350 | 800  | 2722 | 2872 | 1172 | 1322 | 2350 | 1172 | 2722 | 1322 | 2872 |
| Thraupidae      | <i>Chlorospingus ophthalmicus</i>     | 1000 | 2561 | 1000 | 2933 | 3082 | 1372 | 1521 | 2561 | 1372 | 2933 | 1521 | 3082 |
| Thraupidae      | <i>Chlorospingus parvirostris</i>     | 1100 | 2600 | 1100 | 2972 | 3118 | 1472 | 1618 | 2600 | 1472 | 2972 | 1618 | 3118 |
| Thraupidae      | <i>Cissopis leverianus</i>            | 250  | 1600 | 250  | 1983 | 2144 | 633  | 794  | 1600 | 633  | 1983 | 794  | 2144 |
| Thraupidae      | <i>Conirostrum cinereum</i>           | 2850 | 3500 | 2850 | 3864 | 4026 | 3214 | 3376 | 3500 | 3214 | 3864 | 3376 | 4026 |
| Thraupidae      | <i>Conirostrum speciosum</i>          | 250  | 900  | 250  | 1294 | 1463 | 644  | 813  | 900  | 644  | 1294 | 813  | 1463 |
| Thraupidae      | <i>Cyanerpes caeruleus</i>            | 250  | 1400 | 250  | 1786 | 1953 | 636  | 803  | 1400 | 636  | 1786 | 803  | 1953 |
| Thraupidae      | <i>Cyanerpes cyaneus</i>              | 250  | 1000 | 250  | 1386 | 1553 | 636  | 803  | 1000 | 636  | 1386 | 803  | 1553 |
| Thraupidae      | <i>Dacnis cayana</i>                  | 250  | 1550 | 250  | 1933 | 2094 | 633  | 794  | 1550 | 633  | 1933 | 794  | 2094 |
| Thraupidae      | <i>Dacnis flaviventer</i>             | 250  | 1000 | 250  | 1386 | 1553 | 636  | 803  | 1000 | 636  | 1386 | 803  | 1553 |
| Thraupidae      | <i>Dacnis lineata</i>                 | 250  | 1300 | 250  | 1686 | 1853 | 636  | 803  | 1300 | 636  | 1686 | 803  | 1853 |
| Thraupidae      | <i>Delothraupis castaneoventris</i>   | 2305 | 3520 | 2305 | 3887 | 4043 | 2672 | 2828 | 3520 | 2672 | 3887 | 2828 | 4043 |
| Thraupidae      | <i>Diglossa brunneiventris</i>        | 2518 | 3560 | 2518 | 3924 | 4086 | 2882 | 3044 | 3560 | 2882 | 3924 | 3044 | 4086 |

|            |                                 |      |      |      |      |      |      |      |      |      |      |      |      |
|------------|---------------------------------|------|------|------|------|------|------|------|------|------|------|------|------|
| Thraupidae | <i>Diglossa caeruleascens</i>   | 1399 | 2700 | 1399 | 3072 | 3218 | 1771 | 1917 | 2700 | 1771 | 3072 | 1917 | 3218 |
| Thraupidae | <i>Diglossa cyanea</i>          | 1394 | 3600 | 1394 | 3969 | 4121 | 1763 | 1915 | 3600 | 1763 | 3969 | 1915 | 4121 |
| Thraupidae | <i>Diglossa glauca</i>          | 1000 | 2300 | 1000 | 2672 | 2822 | 1372 | 1522 | 2300 | 1372 | 2672 | 1522 | 2822 |
| Thraupidae | <i>Diglossa mystacalis</i>      | 2600 | 3600 | 2600 | 3964 | 4126 | 2964 | 3126 | 3600 | 2964 | 3964 | 3126 | 4126 |
| Thraupidae | <i>Diglossa sittoides</i>       | 1900 | 3600 | 1900 | 3968 | 4122 | 2268 | 2422 | 3600 | 2268 | 3968 | 2422 | 4122 |
| Thraupidae | <i>Dubusia taeniata</i>         | 1900 | 3200 | 1900 | 3572 | 3723 | 2272 | 2423 | 3200 | 2272 | 3572 | 2423 | 3723 |
| Thraupidae | <i>Euphonia chlorotica</i>      | 250  | 450  | 250  | 852  | 1029 | 652  | 829  | 450  | 652  | 852  | 829  | 1029 |
| Thraupidae | <i>Euphonia chrysopasta</i>     | 250  | 950  | 250  | 1344 | 1513 | 644  | 813  | 950  | 644  | 1344 | 813  | 1513 |
| Thraupidae | <i>Euphonia laniirostris</i>    | 250  | 1500 | 250  | 1883 | 2044 | 633  | 794  | 1500 | 633  | 1883 | 794  | 2044 |
| Thraupidae | <i>Euphonia mesochrysa</i>      | 600  | 1800 | 600  | 2171 | 2325 | 971  | 1125 | 1800 | 971  | 2171 | 1125 | 2325 |
| Thraupidae | <i>Euphonia minuta</i>          | 250  | 1050 | 250  | 1436 | 1603 | 636  | 803  | 1050 | 636  | 1436 | 803  | 1603 |
| Thraupidae | <i>Euphonia rufiventris</i>     | 250  | 950  | 250  | 1344 | 1513 | 644  | 813  | 950  | 644  | 1344 | 813  | 1513 |
| Thraupidae | <i>Euphonia xanthogaster</i>    | 250  | 2130 | 250  | 2511 | 2669 | 631  | 789  | 2130 | 631  | 2511 | 789  | 2669 |
| Thraupidae | <i>Iridophanes pulcherrimus</i> | 1100 | 1800 | 1100 | 2172 | 2318 | 1472 | 1618 | 1800 | 1472 | 2172 | 1618 | 2318 |
| Thraupidae | <i>Iridosornis analis</i>       | 1000 | 2200 | 1000 | 2572 | 2722 | 1372 | 1522 | 2200 | 1372 | 2572 | 1522 | 2722 |
| Thraupidae | <i>Iridosornis jelskii</i>      | 2200 | 3500 | 2200 | 3867 | 4023 | 2567 | 2723 | 3500 | 2567 | 3867 | 2723 | 4023 |
| Thraupidae | <i>Lamprospiza melanoleuca</i>  | 250  | 900  | 250  | 1294 | 1463 | 644  | 813  | 900  | 644  | 1294 | 813  | 1463 |
| Thraupidae | <i>Pipraeidea melanonota</i>    | 450  | 3000 | 450  | 3374 | 3528 | 824  | 978  | 3000 | 824  | 3374 | 978  | 3528 |
| Thraupidae | <i>Piranga leucoptera</i>       | 900  | 1800 | 900  | 2171 | 2325 | 1271 | 1425 | 1800 | 1271 | 2171 | 1425 | 2325 |
| Thraupidae | <i>Ramphocelus carbo</i>        | 250  | 1600 | 250  | 1983 | 2144 | 633  | 794  | 1600 | 633  | 1983 | 794  | 2144 |
| Thraupidae | <i>Ramphocelus nigrogularis</i> | 250  | 1000 | 250  | 1386 | 1553 | 636  | 803  | 1000 | 636  | 1386 | 803  | 1553 |
| Thraupidae | <i>Schistochlamys melanopis</i> | 600  | 2600 | 600  | 2972 | 3121 | 972  | 1121 | 2600 | 972  | 2972 | 1121 | 3121 |
| Thraupidae | <i>Tachyphonus cristatus</i>    | 300  | 450  | 300  | 852  | 1029 | 702  | 879  | 450  | 702  | 852  | 879  | 1029 |
| Thraupidae | <i>Tachyphonus rufiventer</i>   | 250  | 1250 | 250  | 1636 | 1803 | 636  | 803  | 1250 | 636  | 1636 | 803  | 1803 |
| Thraupidae | <i>Tangara arthus</i>           | 600  | 1800 | 600  | 2171 | 2325 | 971  | 1125 | 1800 | 971  | 2171 | 1125 | 2325 |
| Thraupidae | <i>Tangara callophrys</i>       | 250  | 950  | 250  | 1344 | 1513 | 644  | 813  | 950  | 644  | 1344 | 813  | 1513 |
| Thraupidae | <i>Tangara chilensis</i>        | 250  | 1921 | 250  | 2304 | 2465 | 633  | 794  | 1921 | 633  | 2304 | 794  | 2465 |
| Thraupidae | <i>Tangara chrysotis</i>        | 850  | 2115 | 850  | 2487 | 2637 | 1222 | 1372 | 2115 | 1222 | 2487 | 1372 | 2637 |
| Thraupidae | <i>Tangara cyanicollis</i>      | 500  | 2000 | 500  | 2375 | 2529 | 875  | 1029 | 2000 | 875  | 2375 | 1029 | 2529 |
| Thraupidae | <i>Tangara cyanotis</i>         | 1300 | 2000 | 1300 | 2372 | 2518 | 1672 | 1818 | 2000 | 1672 | 2372 | 1818 | 2518 |
| Thraupidae | <i>Tangara gyrola</i>           | 250  | 1500 | 250  | 1883 | 2044 | 633  | 794  | 1500 | 633  | 1883 | 794  | 2044 |
| Thraupidae | <i>Tangara mexicana</i>         | 250  | 1000 | 250  | 1386 | 1553 | 636  | 803  | 1000 | 636  | 1386 | 803  | 1553 |
| Thraupidae | <i>Tangara nigrocincta</i>      | 250  | 1100 | 250  | 1486 | 1653 | 636  | 803  | 1100 | 636  | 1486 | 803  | 1653 |
| Thraupidae | <i>Tangara nigroviridis</i>     | 1220 | 2500 | 1220 | 2872 | 3018 | 1592 | 1738 | 2500 | 1592 | 2872 | 1738 | 3018 |
| Thraupidae | <i>Tangara parzudakii</i>       | 1375 | 2000 | 1375 | 2372 | 2518 | 1747 | 1893 | 2000 | 1747 | 2372 | 1893 | 2518 |
| Thraupidae | <i>Tangara punctata</i>         | 600  | 2000 | 600  | 2372 | 2522 | 972  | 1122 | 2000 | 972  | 2372 | 1122 | 2522 |
| Thraupidae | <i>Tangara ruficervix</i>       | 1000 | 2100 | 1000 | 2472 | 2622 | 1372 | 1522 | 2100 | 1372 | 2472 | 1522 | 2622 |
| Thraupidae | <i>Tangara schrankii</i>        | 250  | 1100 | 250  | 1486 | 1653 | 636  | 803  | 1100 | 636  | 1486 | 803  | 1653 |
| Thraupidae | <i>Tangara vassorii</i>         | 1690 | 3250 | 1690 | 3622 | 3773 | 2062 | 2213 | 3250 | 2062 | 3622 | 2213 | 3773 |
| Thraupidae | <i>Tangara velia</i>            | 250  | 600  | 250  | 994  | 1163 | 644  | 813  | 600  | 644  | 994  | 813  | 1163 |
| Thraupidae | <i>Tangara viridicollis</i>     | 800  | 2600 | 800  | 2972 | 3121 | 1172 | 1321 | 2600 | 1172 | 2972 | 1321 | 3121 |
| Thraupidae | <i>Tangara xanthocephala</i>    | 1000 | 2500 | 1000 | 2872 | 3021 | 1372 | 1521 | 2500 | 1372 | 2872 | 1521 | 3021 |
| Thraupidae | <i>Tangara xanthogastra</i>     | 250  | 1400 | 250  | 1786 | 1953 | 636  | 803  | 1400 | 636  | 1786 | 803  | 1953 |
| Thraupidae | <i>Tersina viridis</i>          | 250  | 1450 | 250  | 1836 | 2003 | 636  | 803  | 1450 | 636  | 1836 | 803  | 2003 |
| Thraupidae | <i>Thlypopsis sordida</i>       | 250  | 600  | 250  | 994  | 1163 | 644  | 813  | 600  | 644  | 994  | 813  | 1163 |
| Thraupidae | <i>Thraupis bonariensis</i>     | 1000 | 3500 | 1000 | 3869 | 4023 | 1369 | 1523 | 3500 | 1369 | 3869 | 1523 | 4023 |
| Thraupidae | <i>Thraupis cyanocephala</i>    | 1335 | 3032 | 1335 | 3404 | 3554 | 1707 | 1857 | 3032 | 1707 | 3404 | 1857 | 3554 |
| Thraupidae | <i>Thraupis episcopus</i>       | 250  | 1600 | 250  | 1983 | 2144 | 633  | 794  | 1600 | 633  | 1983 | 794  | 2144 |
| Thraupidae | <i>Thraupis palmarum</i>        | 250  | 1600 | 250  | 1983 | 2144 | 633  | 794  | 1600 | 633  | 1983 | 794  | 2144 |
| Thraupidae | <i>Trichothraupis melanops</i>  | 1000 | 1650 | 1000 | 2021 | 2175 | 1371 | 1525 | 1650 | 1371 | 2021 | 1525 | 2175 |

|            |                                  |      |      |      |      |      |      |      |      |      |      |      |      |
|------------|----------------------------------|------|------|------|------|------|------|------|------|------|------|------|------|
| Tinamidae  | <i>Crypturellus atrocapillus</i> | 250  | 1000 | 250  | 1386 | 1553 | 636  | 803  | 1000 | 636  | 1386 | 803  | 1553 |
| Tinamidae  | <i>Crypturellus bartletti</i>    | 250  | 500  | 250  | 894  | 1063 | 644  | 813  | 500  | 644  | 894  | 813  | 1063 |
| Tinamidae  | <i>Crypturellus cinereus</i>     | 250  | 1000 | 250  | 1386 | 1553 | 636  | 803  | 1000 | 636  | 1386 | 803  | 1553 |
| Tinamidae  | <i>Crypturellus obsoletus</i>    | 450  | 3013 | 450  | 3387 | 3541 | 824  | 978  | 3013 | 824  | 3387 | 978  | 3541 |
| Tinamidae  | <i>Crypturellus soui</i>         | 250  | 1500 | 250  | 1883 | 2044 | 633  | 794  | 1500 | 633  | 1883 | 794  | 2044 |
| Tinamidae  | <i>Crypturellus strigulosus</i>  | 350  | 750  | 350  | 1137 | 1298 | 737  | 898  | 750  | 737  | 1137 | 898  | 1298 |
| Tinamidae  | <i>Crypturellus undulatus</i>    | 250  | 800  | 250  | 1194 | 1363 | 644  | 813  | 800  | 644  | 1194 | 813  | 1363 |
| Tinamidae  | <i>Crypturellus variegatus</i>   | 250  | 500  | 250  | 894  | 1063 | 644  | 813  | 500  | 644  | 894  | 813  | 1063 |
| Tinamidae  | <i>Nothocercus nigrocapillus</i> | 1600 | 3200 | 1600 | 3572 | 3723 | 1972 | 2123 | 3200 | 1972 | 3572 | 2123 | 3723 |
| Tinamidae  | <i>Tinamus guttatus</i>          | 250  | 1100 | 250  | 1486 | 1653 | 636  | 803  | 1100 | 636  | 1486 | 803  | 1653 |
| Tinamidae  | <i>Tinamus major</i>             | 250  | 700  | 250  | 1094 | 1263 | 644  | 813  | 700  | 644  | 1094 | 813  | 1263 |
| Tinamidae  | <i>Tinamus tao</i>               | 250  | 1300 | 250  | 1686 | 1853 | 636  | 803  | 1300 | 636  | 1686 | 803  | 1853 |
| Trogonidae | <i>Pharomachrus antisianus</i>   | 1000 | 2338 | 1000 | 2710 | 2860 | 1372 | 1522 | 2338 | 1372 | 2710 | 1522 | 2860 |
| Trogonidae | <i>Pharomachrus auriceps</i>     | 1300 | 3049 | 1300 | 3421 | 3571 | 1672 | 1822 | 3049 | 1672 | 3421 | 1822 | 3571 |
| Trogonidae | <i>Pharomachrus pavoninus</i>    | 250  | 1200 | 250  | 1586 | 1753 | 636  | 803  | 1200 | 636  | 1586 | 803  | 1753 |
| Trogonidae | <i>Trogon collaris</i>           | 250  | 1489 | 250  | 1875 | 2042 | 636  | 803  | 1489 | 636  | 1875 | 803  | 2042 |
| Trogonidae | <i>Trogon curucui</i>            | 250  | 1500 | 250  | 1883 | 2044 | 633  | 794  | 1500 | 633  | 1883 | 794  | 2044 |
| Trogonidae | <i>Trogon melanurus</i>          | 250  | 1000 | 250  | 1386 | 1553 | 636  | 803  | 1000 | 636  | 1386 | 803  | 1553 |
| Trogonidae | <i>Trogon personatus</i>         | 1100 | 3500 | 1100 | 3869 | 4021 | 1469 | 1621 | 3500 | 1469 | 3869 | 1621 | 4021 |
| Trogonidae | <i>Trogon violaceus</i>          | 250  | 876  | 250  | 1270 | 1439 | 644  | 813  | 876  | 644  | 1270 | 813  | 1439 |
| Trogonidae | <i>Trogon viridis</i>            | 250  | 878  | 250  | 1272 | 1441 | 644  | 813  | 878  | 644  | 1272 | 813  | 1441 |
| Turdidae   | <i>Catharus fuscater</i>         | 1500 | 2850 | 1500 | 3222 | 3368 | 1872 | 2018 | 2850 | 1872 | 3222 | 2018 | 3368 |
| Turdidae   | <i>Entomodestes leucotis</i>     | 1139 | 2900 | 1139 | 3272 | 3418 | 1511 | 1657 | 2900 | 1511 | 3272 | 1657 | 3418 |
| Turdidae   | <i>Myadestes ralloides</i>       | 750  | 2900 | 750  | 3272 | 3421 | 1122 | 1271 | 2900 | 1122 | 3272 | 1271 | 3421 |
| Turdidae   | <i>Turdus albicollis</i>         | 250  | 850  | 250  | 1244 | 1413 | 644  | 813  | 850  | 644  | 1244 | 813  | 1413 |
| Turdidae   | <i>Turdus chiguanco</i>          | 1300 | 3520 | 1300 | 3889 | 4041 | 1669 | 1821 | 3520 | 1669 | 3889 | 1821 | 4041 |
| Turdidae   | <i>Turdus fuscater</i>           | 2500 | 3500 | 2500 | 3867 | 4023 | 2867 | 3023 | 3500 | 2867 | 3867 | 3023 | 4023 |
| Turdidae   | <i>Turdus hauxwelli</i>          | 250  | 1496 | 250  | 1882 | 2049 | 636  | 803  | 1496 | 636  | 1882 | 803  | 2049 |
| Turdidae   | <i>Turdus ignobilis</i>          | 250  | 1640 | 250  | 2023 | 2184 | 633  | 794  | 1640 | 633  | 2023 | 794  | 2184 |
| Turdidae   | <i>Turdus leucops</i>            | 850  | 2600 | 850  | 2972 | 3121 | 1222 | 1371 | 2600 | 1222 | 2972 | 1371 | 3121 |
| Turdidae   | <i>Turdus nigriceps</i>          | 250  | 1851 | 250  | 2234 | 2395 | 633  | 794  | 1851 | 633  | 2234 | 794  | 2395 |
| Turdidae   | <i>Turdus serranus</i>           | 1400 | 3342 | 1400 | 3714 | 3864 | 1772 | 1922 | 3342 | 1772 | 3714 | 1922 | 3864 |
| Tyrannidae | <i>Elaenia albiceps</i>          | 500  | 3250 | 500  | 3624 | 3778 | 874  | 1028 | 3250 | 874  | 3624 | 1028 | 3778 |
| Tyrannidae | <i>Elaenia flavogaster</i>       | 450  | 900  | 450  | 1287 | 1448 | 837  | 998  | 900  | 837  | 1287 | 998  | 1448 |
| Tyrannidae | <i>Elaenia gigas</i>             | 250  | 1550 | 250  | 1933 | 2094 | 633  | 794  | 1550 | 633  | 1933 | 794  | 2094 |
| Tyrannidae | <i>Elaenia obscura</i>           | 1700 | 3000 | 1700 | 3372 | 3523 | 2072 | 2223 | 3000 | 2072 | 3372 | 2223 | 3523 |
| Tyrannidae | <i>Elaenia pallatangae</i>       | 1100 | 3250 | 1100 | 3622 | 3772 | 1472 | 1622 | 3250 | 1472 | 3622 | 1622 | 3772 |
| Tyrannidae | <i>Lophotriccus pileatus</i>     | 800  | 1821 | 800  | 2192 | 2346 | 1171 | 1325 | 1821 | 1171 | 2192 | 1325 | 2346 |
| Tyrannidae | <i>Mionectes macconnelli</i>     | 250  | 1200 | 250  | 1586 | 1753 | 636  | 803  | 1200 | 636  | 1586 | 803  | 1753 |
| Tyrannidae | <i>Mionectes oleagineus</i>      | 250  | 1350 | 250  | 1736 | 1903 | 636  | 803  | 1350 | 636  | 1736 | 803  | 1903 |
| Tyrannidae | <i>Mionectes olivaceus</i>       | 250  | 1712 | 250  | 2095 | 2256 | 633  | 794  | 1712 | 633  | 2095 | 794  | 2256 |
| Tyrannidae | <i>Mionectes striaticollis</i>   | 550  | 3377 | 550  | 3749 | 3901 | 922  | 1074 | 3377 | 922  | 3749 | 1074 | 3901 |
| Tyrannidae | <i>Zimmerius bolivianus</i>      | 1000 | 2901 | 1000 | 3273 | 3422 | 1372 | 1521 | 2901 | 1372 | 3273 | 1521 | 3422 |
| Tyrannidae | <i>Zimmerius gracilipes</i>      | 250  | 850  | 250  | 1244 | 1413 | 644  | 813  | 850  | 644  | 1244 | 813  | 1413 |







|                 |                                       |       |       |       |       |       |       |       |       |       |       |       |       |       |       |       |       |       |       |       |       |       |
|-----------------|---------------------------------------|-------|-------|-------|-------|-------|-------|-------|-------|-------|-------|-------|-------|-------|-------|-------|-------|-------|-------|-------|-------|-------|
| Psittacidae     | <i>Orthopsittaca manilata</i>         | 0.098 | 0.007 | 0.007 | 0.092 | 0.221 | 0.957 | 0.005 | 0.019 | 0.019 | 0.003 | 0.005 | 0.003 | 0.015 | 0.023 | 0.003 | 0.003 | 0.004 | 0.003 | 0.004 | 0.007 | 0.010 |
| Psittacidae     | <i>Pionites leucogaster</i>           | 0.004 | 0.000 | 0.000 | 0.000 | 0.000 | 0.241 | 0.000 | 0.000 | 0.000 | 0.000 | 0.000 | 0.000 | 0.001 | 0.001 | 0.000 | 0.000 | 0.000 | 0.000 | 0.000 | 0.000 | 0.000 |
| Psittacidae     | <i>Pionus menstruus</i>               | 0.137 | 0.161 | 0.542 | 0.489 | 0.518 | 0.981 | 0.078 | 0.546 | 0.762 | 0.653 | 0.039 | 0.050 | 0.004 | 0.092 | 0.867 | 0.004 | 0.004 | 0.004 | 0.004 | 0.004 | 0.004 |
| Psittacidae     | <i>Pionus tumultuosus</i>             | 0.073 | 0.041 | 0.040 | 0.203 | 0.048 | 0.009 | 0.959 | 0.029 | 0.418 | 0.989 | 0.076 | 0.024 | 0.893 | 0.990 | 0.993 | 0.297 | 0.990 | 0.991 | 0.042 | 0.029 | 0.212 |
| Psittacidae     | <i>Primolius couloni</i>              | 0.109 | 0.006 | 0.006 | 0.050 | 0.975 | 0.991 | 0.006 | 0.020 | 0.042 | 0.007 | 0.029 | 0.008 | 0.005 | 0.004 | 0.005 | 0.015 | 0.011 | 0.012 | 0.026 | 0.006 | 0.006 |
| Psittacidae     | <i>Pyrrhura barrabandi</i>            | 0.006 | 0.006 | 0.006 | 0.006 | 0.007 | 0.030 | 0.006 | 0.006 | 0.642 | 0.006 | 0.006 | 0.006 | 0.006 | 0.006 | 0.006 | 0.006 | 0.006 | 0.006 | 0.006 | 0.006 | 0.006 |
| Psittacidae     | <i>Pyrrhura roseifrons</i>            | 0.005 | 0.005 | 0.005 | 0.005 | 0.646 | 0.941 | 0.005 | 0.005 | 0.104 | 0.005 | 0.005 | 0.005 | 0.005 | 0.005 | 0.005 | 0.005 | 0.005 | 0.005 | 0.005 | 0.005 | 0.005 |
| Psittacidae     | <i>Pyrrhura rupicola</i>              | 0.018 | 0.018 | 0.018 | 0.433 | 0.508 | 0.890 | 0.261 | 0.226 | 0.202 | 0.823 | 0.213 | 0.226 | 0.018 | 0.018 | 0.572 | 0.018 | 0.018 | 0.018 | 0.018 | 0.018 | 0.018 |
| Psittacidae     | <i>Touit huetii</i>                   | 0.264 | 0.318 | 0.062 | 0.005 | 0.018 | 0.941 | 0.001 | 0.007 | 0.012 | 0.001 | 0.005 | 0.007 | 0.001 | 0.001 | 0.001 | 0.000 | 0.000 | 0.000 | 0.001 | 0.000 | 0.000 |
| Psophiidae      | <i>Psophia leucoptera</i>             | 0.995 | 0.274 | 0.159 | 0.057 | 0.563 | 0.996 | 0.023 | 0.061 | 0.313 | 0.023 | 0.028 | 0.146 | 0.012 | 0.022 | 0.021 | 0.002 | 0.002 | 0.002 | 0.007 | 0.006 | 0.012 |
| Ramphastidae    | <i>Andigena hypoglaucia</i>           | 0.003 | 0.003 | 0.003 | 0.003 | 0.003 | 0.003 | 0.017 | 0.003 | 0.003 | 0.008 | 0.003 | 0.003 | 0.230 | 0.047 | 0.026 | 0.767 | 0.928 | 0.688 | 0.814 | 0.200 | 0.147 |
| Ramphastidae    | <i>Aulacorhynchus coeruleicinctis</i> | 0.009 | 0.009 | 0.009 | 0.837 | 0.010 | 0.009 | 0.915 | 0.871 | 0.635 | 0.707 | 0.928 | 0.863 | 0.043 | 0.671 | 0.520 | 0.236 | 0.885 | 0.900 | 0.012 | 0.012 | 0.010 |
| Ramphastidae    | <i>Aulacorhynchus derbianus</i>       | 0.974 | 0.359 | 0.240 | 0.984 | 0.984 | 0.982 | 0.705 | 0.981 | 0.983 | 0.348 | 0.949 | 0.912 | 0.110 | 0.425 | 0.451 | 0.028 | 0.167 | 0.657 | 0.030 | 0.019 | 0.019 |
| Ramphastidae    | <i>Aulacorhynchus prasinus</i>        | 0.116 | 0.001 | 0.001 | 0.937 | 0.976 | 0.986 | 0.948 | 0.841 | 0.898 | 0.995 | 0.766 | 0.194 | 0.860 | 0.915 | 0.956 | 0.047 | 0.522 | 0.419 | 0.060 | 0.316 | 0.240 |
| Ramphastidae    | <i>Capito auratus</i>                 | 0.079 | 0.008 | 0.012 | 0.018 | 0.143 | 0.880 | 0.002 | 0.014 | 0.568 | 0.001 | 0.010 | 0.003 | 0.001 | 0.019 | 0.008 | 0.001 | 0.001 | 0.001 | 0.001 | 0.002 | 0.002 |
| Ramphastidae    | <i>Eubucco richardsoni</i>            | 0.961 | 0.012 | 0.010 | 0.376 | 0.949 | 0.986 | 0.003 | 0.582 | 0.966 | 0.002 | 0.039 | 0.750 | 0.003 | 0.002 | 0.002 | 0.002 | 0.003 | 0.003 | 0.006 | 0.002 | 0.002 |
| Ramphastidae    | <i>Eubucco tucinkae</i>               | 0.602 | 0.073 | 0.073 | 0.310 | 0.997 | 0.998 | 0.100 | 0.112 | 0.112 | 0.086 | 0.086 | 0.086 | 0.007 | 0.086 | 0.098 | 0.004 | 0.004 | 0.004 | 0.005 | 0.005 | 0.005 |
| Ramphastidae    | <i>Eubucco versicolor</i>             | 0.742 | 0.246 | 0.246 | 0.909 | 0.167 | 0.003 | 0.063 | 0.849 | 0.924 | 0.004 | 0.753 | 0.570 | 0.002 | 0.007 | 0.010 | 0.001 | 0.050 | 0.628 | 0.002 | 0.002 | 0.002 |
| Ramphastidae    | <i>Pteroglossus azara</i>             | 0.887 | 0.075 | 0.093 | 0.034 | 0.976 | 0.971 | 0.008 | 0.013 | 0.340 | 0.001 | 0.012 | 0.009 | 0.002 | 0.001 | 0.002 | 0.001 | 0.001 | 0.001 | 0.001 | 0.002 | 0.002 |
| Ramphastidae    | <i>Pteroglossus beauharnaesii</i>     | 0.096 | 0.015 | 0.024 | 0.007 | 0.236 | 0.875 | 0.004 | 0.005 | 0.009 | 0.004 | 0.004 | 0.005 | 0.003 | 0.003 | 0.004 | 0.003 | 0.003 | 0.003 | 0.003 | 0.003 | 0.003 |
| Ramphastidae    | <i>Pteroglossus castanotis</i>        | 0.645 | 0.017 | 0.029 | 0.135 | 0.414 | 0.920 | 0.021 | 0.093 | 0.277 | 0.012 | 0.050 | 0.053 | 0.005 | 0.033 | 0.005 | 0.004 | 0.004 | 0.016 | 0.004 | 0.004 | 0.004 |
| Ramphastidae    | <i>Pteroglossus inscriptus</i>        | 0.384 | 0.037 | 0.023 | 0.026 | 0.829 | 0.901 | 0.015 | 0.027 | 0.046 | 0.014 | 0.021 | 0.024 | 0.013 | 0.014 | 0.014 | 0.015 | 0.014 | 0.014 | 0.014 | 0.013 | 0.013 |
| Ramphastidae    | <i>Ramphastos tucanus</i>             | 0.007 | 0.015 | 0.034 | 0.004 | 0.012 | 0.986 | 0.002 | 0.040 | 0.286 | 0.002 | 0.179 | 0.022 | 0.003 | 0.002 | 0.002 | 0.002 | 0.002 | 0.002 | 0.003 | 0.003 | 0.002 |
| Ramphastidae    | <i>Ramphastos vitellinus</i>          | 0.204 | 0.204 | 0.460 | 0.013 | 0.283 | 0.894 | 0.005 | 0.009 | 0.419 | 0.004 | 0.122 | 0.032 | 0.232 | 0.009 | 0.038 | 0.003 | 0.003 | 0.003 | 0.003 | 0.004 | 0.003 |
| Ramphastidae    | <i>Selenidera reinwardtii</i>         | 0.909 | 0.084 | 0.005 | 0.154 | 0.686 | 0.849 | 0.001 | 0.064 | 0.835 | 0.001 | 0.007 | 0.019 | 0.001 | 0.003 | 0.001 | 0.000 | 0.000 | 0.000 | 0.000 | 0.000 | 0.000 |
| Steatornithidae | <i>Steatornis caripensis</i>          | 0.992 | 0.056 | 0.264 | 0.988 | 0.966 | 0.991 | 0.957 | 0.818 | 0.964 | 0.994 | 0.983 | 0.956 | 0.854 | 0.989 | 0.987 | 0.954 | 0.798 | 0.795 | 0.011 | 0.130 | 0.795 |
| Thraupidae      | <i>Anisognathus igniventris</i>       | 0.003 | 0.003 | 0.003 | 0.176 | 0.203 | 0.044 | 0.392 | 0.185 | 0.375 | 0.529 | 0.018 | 0.008 | 0.090 | 0.222 | 0.966 | 0.551 | 0.940 | 0.993 | 0.878 | 0.767 | 0.005 |
| Thraupidae      | <i>Anisognathus somptuosus</i>        | 0.008 | 0.004 | 0.004 | 0.998 | 0.052 | 0.057 | 0.684 | 0.871 | 0.045 | 0.998 | 0.414 | 0.543 | 0.130 | 0.831 | 0.894 | 0.051 | 0.009 | 0.400 | 0.023 | 0.258 | 0.004 |
| Thraupidae      | <i>Buthraupis montana</i>             | 0.010 | 0.006 | 0.006 | 0.059 | 0.232 | 0.083 | 0.819 | 0.154 | 0.263 | 0.862 | 0.006 | 0.005 | 0.370 | 0.864 | 0.990 | 0.040 | 0.232 | 0.807 | 0.023 | 0.509 | 0.078 |
| Thraupidae      | <i>Catamblyrhynchus diadema</i>       | 0.010 | 0.010 | 0.010 | 0.191 | 0.031 | 0.010 | 0.389 | 0.129 | 0.083 | 0.862 | 0.119 | 0.066 | 0.921 | 0.940 | 0.942 | 0.864 | 0.945 | 0.953 | 0.239 | 0.612 | 0.571 |
| Thraupidae      | <i>Chlorochrysa calliparaea</i>       | 0.593 | 0.007 | 0.007 | 0.876 | 0.745 | 0.967 | 0.585 | 0.925 | 0.819 | 0.988 | 0.119 | 0.614 | 0.065 | 0.717 | 0.996 | 0.005 | 0.063 | 0.015 | 0.005 | 0.005 | 0.005 |
| Thraupidae      | <i>Chlorophanes spiza</i>             | 0.924 | 0.501 | 0.319 | 0.960 | 0.930 | 0.966 | 0.829 | 0.514 | 0.964 | 0.712 | 0.935 | 0.988 | 0.020 | 0.089 | 0.186 | 0.004 | 0.005 | 0.004 | 0.003 | 0.006 | 0.005 |
| Thraupidae      | <i>Chlorophonia cyanea</i>            | 0.051 | 0.004 | 0.004 | 0.913 | 0.339 | 0.199 | 0.993 | 0.904 | 0.978 | 0.335 | 0.900 | 0.890 | 0.637 | 0.823 | 0.599 | 0.004 | 0.045 | 0.811 | 0.004 | 0.007 | 0.006 |
| Thraupidae      | <i>Chlorornis riefferii</i>           | 0.007 | 0.003 | 0.003 | 0.782 | 0.323 | 0.367 | 0.331 | 0.798 | 0.505 | 0.924 | 0.658 | 0.522 | 0.813 | 0.884 | 0.995 | 0.561 | 0.991 | 0.993 | 0.039 | 0.015 | 0.009 |
| Thraupidae      | <i>Chlorospingus canigularis</i>      | 0.008 | 0.006 | 0.006 | 0.970 | 0.444 | 0.006 | 0.881 | 0.812 | 0.610 | 0.922 | 0.916 | 0.826 | 0.371 | 0.960 | 0.995 | 0.098 | 0.773 | 0.469 | 0.006 | 0.005 | 0.006 |
| Thraupidae      | <i>Chlorospingus flavigularis</i>     | 0.215 | 0.010 | 0.010 | 0.985 | 0.662 | 0.666 | 0.995 | 0.992 | 0.996 | 0.985 | 0.994 | 0.994 | 0.059 | 0.076 | 0.995 | 0.007 | 0.059 | 0.015 | 0.003 | 0.003 | 0.003 |
| Thraupidae      | <i>Chlorospingus ophthalmicus</i>     | 0.216 | 0.002 | 0.002 | 0.974 | 0.358 | 0.212 | 0.129 | 0.289 | 0.122 | 0.166 | 0.209 | 0.206 | 0.776 | 0.919 | 0.993 | 0.005 | 0.971 | 0.406 | 0.002 | 0.127 | 0.009 |
| Thraupidae      | <i>Chlorospingus parvirostris</i>     | 0.055 | 0.007 | 0.007 | 0.885 | 0.148 | 0.056 | 0.966 | 0.929 | 0.859 | 0.951 | 0.710 | 0.778 | 0.414 | 0.934 | 0.971 | 0.132 | 0.499 | 0.762 | 0.007 | 0.008 | 0.143 |
| Thraupidae      | <i>Cissopis leverianus</i>            | 0.982 | 0.020 | 0.009 | 0.971 | 0.965 | 0.919 | 0.010 | 0.856 | 0.898 | 0.032 | 0.030 | 0.789 | 0.032 | 0.225 | 0.829 | 0.007 | 0.011 | 0.075 | 0.008 | 0.006 | 0.007 |
| Thraupidae      | <i>Conirostrum cinereum</i>           | 0.004 | 0.003 | 0.003 | 0.013 | 0.056 | 0.003 | 0.008 | 0.078 | 0.005 | 0.016 | 0.013 | 0.068 | 0.006 | 0.012 | 0.008 | 0.003 | 0.012 | 0.337 | 0.014 | 0.003 | 0.003 |
| Thraupidae      | <i>Conirostrum speciosum</i>          | 0.016 | 0.010 | 0.015 | 0.182 | 0.105 | 0.083 | 0.084 | 0.164 | 0.565 | 0.193 | 0.136 | 0.260 | 0.006 | 0.018 | 0.247 | 0.007 | 0.024 | 0.093 | 0.006 | 0.008 | 0.009 |
| Thraupidae      | <i>Cyanerpes caeruleus</i>            | 0.868 | 0.111 | 0.693 | 0.665 | 0.579 | 0.928 | 0.734 | 0.835 | 0.987 | 0.818 | 0.865 | 0.856 | 0.006 | 0.260 | 0.233 | 0.002 | 0.002 | 0.002 | 0.002 | 0.006 | 0.006 |
| Thraupidae      | <i>Cyanerpes cyaneus</i>              | 0.018 | 0.107 | 0.648 | 0.005 | 0.083 | 0.034 | 0.069 | 0.007 | 0.417 | 0.371 | 0.013 | 0.009 | 0.033 | 0.389 | 0.358 | 0.002 | 0.000 | 0.001 | 0.002 | 0.000 | 0.000 |
| Thraupidae      | <i>Dacnis cayana</i>                  | 0.952 | 0.736 | 0.347 | 0.840 | 0.838 | 0.179 | 0.093 | 0.216 | 0.969 | 0.075 | 0.492 | 0.822 | 0.431 | 0.030 | 0.622 | 0.005 | 0.015 | 0.070 | 0.005 | 0.005 | 0.005 |
| Thraupidae      | <i>Dacnis flaviventer</i>             | 0.894 | 0.263 | 0.035 | 0.209 | 0.950 | 0.993 | 0.006 | 0.099 | 0.374 | 0.053 | 0.020 | 0.018 | 0.005 | 0.190 | 0.086 | 0.001 | 0.002 | 0.005 | 0.002 | 0.004 | 0.003 |
| Thraupidae      | <i>Dacnis lineata</i>                 | 0.344 | 0.088 | 0.033 | 0.893 | 0.990 | 0.402 | 0.748 | 0.543 | 0.979 | 0.594 | 0.352 | 0.969 | 0.005 | 0.487 | 0.731 | 0.003 | 0.004 | 0.135 | 0.003 | 0.004 | 0.004 |
| Thraupidae      | <i>Delothraupis castaneiventris</i>   | 0.047 | 0.004 | 0.004 | 0.098 | 0.032 | 0.009 | 0.065 | 0.240 | 0.080 | 0.065 | 0.130 | 0.219 | 0.000 | 0.001 | 0.004 | 0.070 | 0.080 | 0.039 | 0.000 | 0.007 | 0.003 |
| Thraupidae      | <i>Diglossa brunneiventris</i>        | 0.001 | 0.001 | 0.001 | 0.001 | 0.001 | 0.001 | 0.001 | 0.001 | 0.001 | 0.001 | 0.001 | 0.001 | 0.581 | 0.002 | 0.002 | 0.003 | 0.006 | 0.001 | 0.007 | 0.063 | 0.044 |
| Thraupidae      | <i>Diglossa caeruleascens</i>         | 0.010 | 0.004 | 0.005 | 0.954 | 0.006 | 0.004 | 0.041 | 0.992 | 0.132 | 0.021 | 0.860 | 0.622 | 0.977 | 0.997 | 0.998 | 0.145 | 0.346 | 0.813 | 0.042 | 0.078 | 0.127 |
| Thraupidae      | <i>Diglossa cyanea</i>                | 0.003 | 0.002 | 0.002 | 0.025 | 0.090 | 0.020 | 0.075 | 0.015 | 0.096 | 0.982 | 0.147 | 0.072 | 0.969 | 0.280 | 0.956 | 0.044 | 0.653 | 0.303 | 0.125 | 0.042 | 0.003 |

|            |                                  |       |       |       |       |       |       |       |       |       |       |       |       |       |       |       |       |       |       |       |       |       |
|------------|----------------------------------|-------|-------|-------|-------|-------|-------|-------|-------|-------|-------|-------|-------|-------|-------|-------|-------|-------|-------|-------|-------|-------|
| Thraupidae | <i>Diglossa glauca</i>           | 0.641 | 0.049 | 0.049 | 0.986 | 0.882 | 0.627 | 0.983 | 0.986 | 0.980 | 0.950 | 0.985 | 0.983 | 0.082 | 0.673 | 0.969 | 0.010 | 0.073 | 0.077 | 0.013 | 0.018 | 0.023 |
| Thraupidae | <i>Diglossa mystacalis</i>       | 0.001 | 0.001 | 0.001 | 0.019 | 0.324 | 0.001 | 0.010 | 0.019 | 0.047 | 0.002 | 0.008 | 0.013 | 0.002 | 0.005 | 0.002 | 0.185 | 0.091 | 0.097 | 0.033 | 0.011 | 0.003 |
| Thraupidae | <i>Diglossa sittoides</i>        | 0.003 | 0.002 | 0.002 | 0.740 | 0.018 | 0.005 | 0.974 | 0.659 | 0.491 | 0.967 | 0.921 | 0.700 | 0.216 | 0.711 | 0.375 | 0.062 | 0.682 | 0.779 | 0.004 | 0.005 | 0.004 |
| Thraupidae | <i>Dubusia taeniata</i>          | 0.001 | 0.001 | 0.001 | 0.003 | 0.001 | 0.001 | 0.182 | 0.009 | 0.002 | 0.106 | 0.008 | 0.006 | 0.863 | 0.657 | 0.868 | 0.374 | 0.156 | 0.731 | 0.239 | 0.971 | 0.919 |
| Thraupidae | <i>Euphonia chlorotica</i>       | 0.005 | 0.019 | 0.074 | 0.012 | 0.070 | 0.008 | 0.014 | 0.011 | 0.009 | 0.009 | 0.024 | 0.115 | 0.004 | 0.009 | 0.095 | 0.004 | 0.011 | 0.010 | 0.004 | 0.004 | 0.004 |
| Thraupidae | <i>Euphonia chrysopasta</i>      | 0.882 | 0.062 | 0.074 | 0.496 | 0.918 | 0.961 | 0.051 | 0.459 | 0.867 | 0.049 | 0.318 | 0.393 | 0.022 | 0.042 | 0.051 | 0.017 | 0.017 | 0.017 | 0.026 | 0.028 | 0.017 |
| Thraupidae | <i>Euphonia laniirostris</i>     | 0.020 | 0.152 | 0.188 | 0.794 | 0.922 | 0.863 | 0.909 | 0.840 | 0.824 | 0.980 | 0.901 | 0.782 | 0.005 | 0.511 | 0.307 | 0.003 | 0.005 | 0.135 | 0.003 | 0.119 | 0.003 |
| Thraupidae | <i>Euphonia mesochrysa</i>       | 0.156 | 0.075 | 0.075 | 0.968 | 0.048 | 0.034 | 0.935 | 0.981 | 0.970 | 0.452 | 0.805 | 0.960 | 0.008 | 0.797 | 0.860 | 0.004 | 0.017 | 0.066 | 0.005 | 0.005 | 0.005 |
| Thraupidae | <i>Euphonia minuta</i>           | 0.517 | 0.343 | 0.121 | 0.394 | 0.623 | 0.743 | 0.251 | 0.402 | 0.544 | 0.206 | 0.343 | 0.402 | 0.069 | 0.100 | 0.166 | 0.013 | 0.020 | 0.051 | 0.023 | 0.031 | 0.037 |
| Thraupidae | <i>Euphonia rufiventris</i>      | 0.157 | 0.236 | 0.192 | 0.027 | 0.855 | 0.991 | 0.010 | 0.064 | 0.098 | 0.010 | 0.014 | 0.619 | 0.011 | 0.019 | 0.047 | 0.009 | 0.026 | 0.073 | 0.010 | 0.012 | 0.028 |
| Thraupidae | <i>Euphonia xanthogaster</i>     | 0.950 | 0.151 | 0.305 | 0.988 | 0.510 | 0.272 | 0.655 | 0.862 | 0.989 | 0.914 | 0.973 | 0.958 | 0.005 | 0.219 | 0.164 | 0.004 | 0.080 | 0.021 | 0.004 | 0.011 | 0.003 |
| Thraupidae | <i>Iridophanes pulcherrimus</i>  | 0.010 | 0.006 | 0.006 | 0.067 | 0.380 | 0.000 | 0.984 | 0.232 | 0.396 | 0.997 | 0.672 | 0.874 | 0.919 | 0.998 | 0.999 | 0.326 | 0.820 | 0.967 | 0.001 | 0.001 | 0.001 |
| Thraupidae | <i>Iridosornis analis</i>        | 0.014 | 0.011 | 0.011 | 0.983 | 0.323 | 0.050 | 0.864 | 0.973 | 0.793 | 0.886 | 0.988 | 0.991 | 0.178 | 0.513 | 0.872 | 0.010 | 0.023 | 0.132 | 0.024 | 0.022 | 0.023 |
| Thraupidae | <i>Iridosornis jelskii</i>       | 0.025 | 0.018 | 0.018 | 0.822 | 0.739 | 0.551 | 0.449 | 0.718 | 0.743 | 0.364 | 0.464 | 0.171 | 0.003 | 0.056 | 0.052 | 0.195 | 0.144 | 0.195 | 0.003 | 0.005 | 0.005 |
| Thraupidae | <i>Lamprospiza melanoleuca</i>   | 0.004 | 0.004 | 0.004 | 0.004 | 0.008 | 0.637 | 0.004 | 0.004 | 0.004 | 0.004 | 0.004 | 0.004 | 0.004 | 0.004 | 0.004 | 0.004 | 0.004 | 0.004 | 0.004 | 0.004 | 0.004 |
| Thraupidae | <i>Pipraeidea melanonota</i>     | 0.441 | 0.003 | 0.003 | 0.510 | 0.073 | 0.629 | 0.310 | 0.625 | 0.325 | 0.480 | 0.681 | 0.784 | 0.273 | 0.790 | 0.991 | 0.007 | 0.677 | 0.929 | 0.003 | 0.036 | 0.003 |
| Thraupidae | <i>Piranga leucoptera</i>        | 0.066 | 0.085 | 0.060 | 0.963 | 0.522 | 0.013 | 0.860 | 0.965 | 0.992 | 0.937 | 0.294 | 0.771 | 0.005 | 0.455 | 0.725 | 0.005 | 0.014 | 0.872 | 0.002 | 0.041 | 0.002 |
| Thraupidae | <i>Ramphocelus carbo</i>         | 0.188 | 0.017 | 0.132 | 0.366 | 0.343 | 0.636 | 0.103 | 0.053 | 0.398 | 0.015 | 0.134 | 0.907 | 0.002 | 0.027 | 0.608 | 0.002 | 0.003 | 0.002 | 0.002 | 0.003 | 0.002 |
| Thraupidae | <i>Ramphocelus nigrogularis</i>  | 0.027 | 0.010 | 0.002 | 0.070 | 0.861 | 0.728 | 0.002 | 0.015 | 0.292 | 0.002 | 0.014 | 0.004 | 0.002 | 0.005 | 0.003 | 0.002 | 0.002 | 0.002 | 0.002 | 0.003 | 0.003 |
| Thraupidae | <i>Schistochlamys melanopis</i>  | 0.485 | 0.699 | 0.901 | 0.931 | 0.978 | 0.838 | 0.239 | 0.958 | 0.993 | 0.044 | 0.061 | 0.330 | 0.010 | 0.011 | 0.040 | 0.011 | 0.099 | 0.083 | 0.009 | 0.009 | 0.010 |
| Thraupidae | <i>Tachyphonus cristatus</i>     | 0.413 | 0.340 | 0.053 | 0.005 | 0.329 | 0.853 | 0.004 | 0.195 | 0.542 | 0.005 | 0.009 | 0.473 | 0.004 | 0.005 | 0.017 | 0.004 | 0.004 | 0.005 | 0.003 | 0.003 | 0.003 |
| Thraupidae | <i>Tachyphonus rufiventer</i>    | 0.676 | 0.052 | 0.028 | 0.982 | 0.993 | 0.993 | 0.054 | 0.974 | 0.983 | 0.024 | 0.847 | 0.646 | 0.003 | 0.003 | 0.024 | 0.003 | 0.005 | 0.005 | 0.003 | 0.004 | 0.003 |
| Thraupidae | <i>Tangara arthus</i>            | 0.083 | 0.003 | 0.003 | 0.985 | 0.884 | 0.388 | 0.636 | 0.832 | 0.972 | 0.200 | 0.955 | 0.962 | 0.067 | 0.127 | 0.598 | 0.004 | 0.003 | 0.014 | 0.003 | 0.298 | 0.003 |
| Thraupidae | <i>Tangara callophrys</i>        | 0.830 | 0.011 | 0.011 | 0.013 | 0.896 | 0.978 | 0.007 | 0.019 | 0.680 | 0.006 | 0.008 | 0.053 | 0.013 | 0.006 | 0.006 | 0.005 | 0.007 | 0.007 | 0.006 | 0.006 | 0.006 |
| Thraupidae | <i>Tangara chilensis</i>         | 0.278 | 0.036 | 0.005 | 0.976 | 0.935 | 0.898 | 0.243 | 0.847 | 0.847 | 0.006 | 0.205 | 0.945 | 0.003 | 0.855 | 0.580 | 0.002 | 0.003 | 0.004 | 0.002 | 0.003 | 0.004 |
| Thraupidae | <i>Tangara chrysotis</i>         | 0.246 | 0.046 | 0.046 | 0.986 | 0.984 | 0.232 | 0.779 | 0.441 | 0.993 | 0.154 | 0.928 | 0.295 | 0.464 | 0.899 | 0.844 | 0.003 | 0.025 | 0.025 | 0.003 | 0.006 | 0.006 |
| Thraupidae | <i>Tangara cyanicollis</i>       | 0.548 | 0.006 | 0.248 | 0.988 | 0.731 | 0.762 | 0.749 | 0.782 | 0.953 | 0.724 | 0.993 | 0.977 | 0.401 | 0.966 | 0.991 | 0.007 | 0.034 | 0.021 | 0.003 | 0.009 | 0.003 |
| Thraupidae | <i>Tangara cyanotis</i>          | 0.010 | 0.010 | 0.010 | 0.954 | 0.080 | 0.283 | 0.932 | 0.943 | 0.738 | 0.948 | 0.926 | 0.903 | 0.010 | 0.379 | 0.889 | 0.010 | 0.224 | 0.058 | 0.010 | 0.010 | 0.010 |
| Thraupidae | <i>Tangara gyrola</i>            | 0.419 | 0.006 | 0.020 | 0.992 | 0.827 | 0.236 | 0.898 | 0.991 | 0.972 | 0.996 | 0.995 | 0.994 | 0.169 | 0.951 | 0.996 | 0.004 | 0.008 | 0.150 | 0.004 | 0.063 | 0.005 |
| Thraupidae | <i>Tangara mexicana</i>          | 0.389 | 0.154 | 0.027 | 0.243 | 0.971 | 0.991 | 0.112 | 0.071 | 0.263 | 0.003 | 0.027 | 0.012 | 0.011 | 0.004 | 0.008 | 0.003 | 0.003 | 0.003 | 0.003 | 0.003 | 0.003 |
| Thraupidae | <i>Tangara nigrocincta</i>       | 0.978 | 0.066 | 0.069 | 0.564 | 0.950 | 0.998 | 0.071 | 0.892 | 0.784 | 0.113 | 0.672 | 0.753 | 0.180 | 0.474 | 0.137 | 0.003 | 0.095 | 0.074 | 0.009 | 0.004 | 0.008 |
| Thraupidae | <i>Tangara nigroviridis</i>      | 0.009 | 0.004 | 0.004 | 0.948 | 0.717 | 0.009 | 0.962 | 0.745 | 0.186 | 0.992 | 0.165 | 0.885 | 0.973 | 0.317 | 0.995 | 0.012 | 0.018 | 0.059 | 0.004 | 0.030 | 0.004 |
| Thraupidae | <i>Tangara parzudakii</i>        | 0.003 | 0.003 | 0.003 | 0.977 | 0.556 | 0.007 | 0.995 | 0.625 | 0.139 | 0.991 | 0.732 | 0.318 | 0.045 | 0.254 | 0.996 | 0.075 | 0.034 | 0.432 | 0.010 | 0.003 | 0.003 |
| Thraupidae | <i>Tangara punctata</i>          | 0.097 | 0.043 | 0.033 | 0.989 | 0.955 | 0.952 | 0.427 | 0.952 | 0.869 | 0.277 | 0.761 | 0.855 | 0.158 | 0.246 | 0.586 | 0.006 | 0.011 | 0.029 | 0.007 | 0.008 | 0.014 |
| Thraupidae | <i>Tangara ruficervix</i>        | 0.005 | 0.005 | 0.005 | 0.978 | 0.084 | 0.013 | 0.987 | 0.636 | 0.421 | 0.991 | 0.136 | 0.197 | 0.133 | 0.579 | 0.990 | 0.022 | 0.451 | 0.660 | 0.005 | 0.005 | 0.005 |
| Thraupidae | <i>Tangara schrankii</i>         | 0.203 | 0.025 | 0.003 | 0.231 | 0.742 | 0.969 | 0.013 | 0.980 | 0.962 | 0.002 | 0.064 | 0.679 | 0.002 | 0.002 | 0.038 | 0.002 | 0.002 | 0.002 | 0.002 | 0.002 | 0.002 |
| Thraupidae | <i>Tangara vassorii</i>          | 0.010 | 0.009 | 0.008 | 0.309 | 0.167 | 0.012 | 0.159 | 0.337 | 0.182 | 0.545 | 0.119 | 0.263 | 0.550 | 0.940 | 0.993 | 0.972 | 0.021 | 0.123 | 0.301 | 0.325 | 0.006 |
| Thraupidae | <i>Tangara velia</i>             | 0.926 | 0.487 | 0.126 | 0.010 | 0.365 | 0.993 | 0.006 | 0.008 | 0.094 | 0.003 | 0.038 | 0.006 | 0.007 | 0.003 | 0.003 | 0.003 | 0.003 | 0.003 | 0.004 | 0.003 | 0.003 |
| Thraupidae | <i>Tangara viridicollis</i>      | 0.033 | 0.014 | 0.014 | 0.066 | 0.002 | 0.002 | 0.023 | 0.196 | 0.004 | 0.133 | 0.077 | 0.297 | 0.005 | 0.002 | 0.002 | 0.002 | 0.009 | 0.005 | 0.001 | 0.002 | 0.002 |
| Thraupidae | <i>Tangara xanthocephala</i>     | 0.005 | 0.002 | 0.002 | 0.871 | 0.797 | 0.003 | 0.459 | 0.958 | 0.285 | 0.974 | 0.167 | 0.790 | 0.908 | 0.987 | 0.998 | 0.012 | 0.125 | 0.988 | 0.003 | 0.018 | 0.003 |
| Thraupidae | <i>Tangara xanthogastra</i>      | 0.583 | 0.055 | 0.045 | 0.926 | 0.979 | 0.992 | 0.021 | 0.989 | 0.971 | 0.004 | 0.287 | 0.322 | 0.067 | 0.006 | 0.003 | 0.060 | 0.115 | 0.011 | 0.005 | 0.004 | 0.004 |
| Thraupidae | <i>Tersina viridis</i>           | 0.590 | 0.065 | 0.285 | 0.994 | 0.427 | 0.570 | 0.245 | 0.679 | 0.887 | 0.957 | 0.971 | 0.866 | 0.500 | 0.258 | 0.199 | 0.007 | 0.048 | 0.447 | 0.005 | 0.005 | 0.005 |
| Thraupidae | <i>Thlyopsis sordida</i>         | 0.741 | 0.123 | 0.057 | 0.021 | 0.914 | 0.306 | 0.016 | 0.184 | 0.350 | 0.013 | 0.126 | 0.350 | 0.004 | 0.034 | 0.239 | 0.002 | 0.884 | 0.639 | 0.002 | 0.002 | 0.002 |
| Thraupidae | <i>Thraupis bonariensis</i>      | 0.008 | 0.002 | 0.002 | 0.002 | 0.002 | 0.002 | 0.006 | 0.089 | 0.011 | 0.183 | 0.020 | 0.135 | 0.002 | 0.068 | 0.068 | 0.003 | 0.066 | 0.299 | 0.002 | 0.002 | 0.002 |
| Thraupidae | <i>Thraupis cyanocephala</i>     | 0.002 | 0.002 | 0.002 | 0.867 | 0.304 | 0.007 | 0.794 | 0.263 | 0.005 | 0.938 | 0.743 | 0.149 | 0.934 | 0.885 | 0.674 | 0.142 | 0.107 | 0.023 | 0.434 | 0.012 | 0.002 |
| Thraupidae | <i>Thraupis episcopus</i>        | 0.109 | 0.267 | 0.617 | 0.267 | 0.549 | 0.190 | 0.458 | 0.299 | 0.762 | 0.931 | 0.430 | 0.370 | 0.019 | 0.671 | 0.414 | 0.024 | 0.007 | 0.011 | 0.006 | 0.008 | 0.006 |
| Thraupidae | <i>Thraupis palmarum</i>         | 0.092 | 0.296 | 0.076 | 0.307 | 0.705 | 0.152 | 0.321 | 0.348 | 0.978 | 0.981 | 0.448 | 0.407 | 0.031 | 0.367 | 0.981 | 0.005 | 0.005 | 0.093 | 0.003 | 0.003 | 0.003 |
| Thraupidae | <i>Trichothraupis melanops</i>   | 0.041 | 0.003 | 0.003 | 0.010 | 0.003 | 0.004 | 0.010 | 0.726 | 0.336 | 0.027 | 0.003 | 0.751 | 0.051 | 0.019 | 0.028 | 0.002 | 0.026 | 0.006 | 0.002 | 0.001 | 0.001 |
| Tinamidae  | <i>Crypturellus atrocipillus</i> | 0.449 | 0.012 | 0.012 | 0.963 | 0.992 | 0.959 | 0.012 | 0.986 | 0.984 | 0.007 | 0.454 | 0.891 | 0.007 | 0.007 | 0.007 | 0.015 | 0.008 | 0.007 | 0.008 | 0.008 | 0.008 |
| Tinamidae  | <i>Crypturellus bartletti</i>    | 0.007 | 0.037 | 0.010 | 0.010 | 0.020 | 0.037 | 0.008 | 0.009 | 0.010 | 0.006 | 0.005 | 0.005 | 0.005 | 0.005 | 0.005 | 0.004 | 0.004 | 0.004 | 0.004 | 0.005 | 0.004 |



**Table S3.** Current and future community composition at all seven elevational levels, including probabilities of occurrence derived from species distribution models (SDMs) of all 232 frugivorous bird species of the Manú Biosphere Reserve, Peru. Based on the MIROC5 climate model, representative concentration pathway (RCP) 6.0. Species' elevational ranges were projected according to four potential dispersal scenarios: no range change, range contraction (lower range limit moves upwards), range expansion (upper range limit moves upwards), and range shift (both lower and upper range limit move upwards). SDMs were based on current and future local temperature and precipitation values.

| Family       | Bird species                       | 500 m   |                 |             |           |       | 1000 m  |                 |             |           |       | 1500 m  |                 |             |           |       | 2000 m  |                 |             |           |       |       |   |
|--------------|------------------------------------|---------|-----------------|-------------|-----------|-------|---------|-----------------|-------------|-----------|-------|---------|-----------------|-------------|-----------|-------|---------|-----------------|-------------|-----------|-------|-------|---|
|              |                                    | current | no range change | contraction | expansion | shift | current | no range change | contraction | expansion | shift | current | no range change | contraction | expansion | shift | current | no range change | contraction | expansion | shift |       |   |
| Cardinalidae | <i>Cyanocompsa cyanoides</i>       | 0.354   | 0.936           | 0           | 0.936     | 0     | 0.965   | 0.975           | 0.975       | 0.975     | 0.975 | 0       | 0.968           | 0           | 0.968     | 0.968 | 0       | 0.758           | 0           | 0         | 0     | 0     |   |
| Cardinalidae | <i>Pheucticus aureoventris</i>     | 0       | 0.008           | 0           | 0         | 0     | 0.302   | 0.027           | 0.027       | 0.027     | 0.027 | 0.008   | 0.183           | 0.183       | 0.183     | 0.183 | 0.028   | 0.321           | 0.321       | 0.321     | 0.321 | 0.321 |   |
| Cardinalidae | <i>Pheucticus chrysogaster</i>     | 0       | 0.003           | 0           | 0         | 0     | 0.063   | 0.011           | 0           | 0.011     | 0     | 0.476   | 0.179           | 0.179       | 0.179     | 0.179 | 0.520   | 0.054           | 0.054       | 0.054     | 0.054 | 0.054 |   |
| Cardinalidae | <i>Saltator aurantiirostris</i>    | 0       | 0.002           | 0           | 0         | 0     | 0       | 0.002           | 0           | 0         | 0     | 0       | 0.022           | 0           | 0         | 0     | 0       | 0.007           | 0           | 0         | 0     | 0     |   |
| Cardinalidae | <i>Saltator coerulescens</i>       | 0.023   | 0.013           | 0           | 0.013     | 0     | 0       | 0.848           | 0           | 0.848     | 0.848 | 0       | 0.683           | 0           | 0         | 0     | 0       | 0               | 0.582       | 0         | 0     | 0     | 0 |
| Cardinalidae | <i>Saltator grossus</i>            | 0.195   | 0.553           | 0           | 0.553     | 0     | 0.988   | 0.841           | 0.841       | 0.841     | 0.841 | 0       | 0.505           | 0           | 0         | 0     | 0       | 0               | 0.830       | 0         | 0     | 0     | 0 |
| Cardinalidae | <i>Saltator maximus</i>            | 0.514   | 0.452           | 0           | 0.452     | 0     | 0.903   | 0.424           | 0.424       | 0.424     | 0.424 | 0.136   | 0.958           | 0.958       | 0.958     | 0.958 | 0.941   | 0.634           | 0.634       | 0.634     | 0.634 | 0.634 |   |
| Columbidae   | <i>Geotrygon montana</i>           | 0.731   | 0.286           | 0           | 0.286     | 0     | 0.270   | 0.567           | 0.567       | 0.567     | 0.567 | 0       | 0.911           | 0           | 0.911     | 0.911 | 0       | 0.517           | 0           | 0         | 0     | 0     |   |
| Columbidae   | <i>Patagioenas cayennensis</i>     | 0.067   | 0.013           | 0           | 0.013     | 0     | 0       | 0.466           | 0           | 0.466     | 0.466 | 0       | 0.956           | 0           | 0         | 0     | 0       | 0.045           | 0           | 0         | 0     | 0     |   |
| Columbidae   | <i>Patagioenas fasciata</i>        | 0       | 0.010           | 0           | 0         | 0     | 0       | 0.432           | 0           | 0         | 0     | 0.790   | 0.496           | 0           | 0.496     | 0     | 0.993   | 0.899           | 0.899       | 0.899     | 0.899 | 0.899 |   |
| Columbidae   | <i>Patagioenas plumbea</i>         | 0.075   | 0.188           | 0           | 0.188     | 0     | 0.344   | 0.272           | 0.272       | 0.272     | 0.272 | 0.030   | 0.978           | 0.978       | 0.978     | 0.978 | 0       | 0.923           | 0           | 0.923     | 0.923 | 0.923 |   |
| Columbidae   | <i>Patagioenas subvinacea</i>      | 0.008   | 0.020           | 0           | 0.020     | 0     | 0.593   | 0.955           | 0.955       | 0.955     | 0.955 | 0.698   | 0.792           | 0.792       | 0.792     | 0.792 | 0       | 0.719           | 0           | 0         | 0     | 0     |   |
| Corvidae     | <i>Cyanocorax cyanomelas</i>       | 0.338   | 0.004           | 0           | 0.004     | 0     | 0.496   | 0.701           | 0.701       | 0.701     | 0.701 | 0       | 0.254           | 0           | 0         | 0     | 0       | 0.044           | 0           | 0         | 0     | 0     |   |
| Corvidae     | <i>Cyanocorax violaceus</i>        | 0.544   | 0.005           | 0           | 0.005     | 0     | 0.207   | 0.971           | 0.971       | 0.971     | 0.971 | 0       | 0.484           | 0           | 0.484     | 0.484 | 0       | 0.089           | 0           | 0         | 0     | 0     |   |
| Corvidae     | <i>Cyanocorax yncas</i>            | 0       | 0.009           | 0           | 0         | 0     | 0       | 0.660           | 0           | 0         | 0     | 0.453   | 0.402           | 0           | 0.402     | 0     | 0.994   | 0.992           | 0.992       | 0.992     | 0.992 | 0.992 |   |
| Cotingidae   | <i>Ampelioides tschudii</i>        | 0       | 0.080           | 0           | 0         | 0     | 0.765   | 0.977           | 0           | 0.977     | 0     | 0       | 0.951           | 0           | 0.951     | 0.951 | 0       | 0.918           | 0           | 0         | 0     | 0     |   |
| Cotingidae   | <i>Ampelion rubrocristatus</i>     | 0       | 0.005           | 0           | 0         | 0     | 0       | 0.004           | 0           | 0         | 0     | 0       | 0.014           | 0           | 0         | 0     | 0       | 0.090           | 0           | 0         | 0     | 0     |   |
| Cotingidae   | <i>Ampelion rufaxilla</i>          | 0       | 0.024           | 0           | 0         | 0     | 0       | 0.221           | 0           | 0         | 0     | 0       | 0.941           | 0           | 0         | 0     | 0.953   | 0.890           | 0.890       | 0.890     | 0.890 | 0.890 |   |
| Cotingidae   | <i>Cephalopterus ornatus</i>       | 0.371   | 0.175           | 0           | 0.175     | 0     | 0.044   | 0.842           | 0.842       | 0.842     | 0.842 | 0.534   | 0.792           | 0.792       | 0.792     | 0.792 | 0       | 0.047           | 0           | 0.047     | 0.047 | 0.047 |   |
| Cotingidae   | <i>Conioptilon mcilhennyi</i>      | 0       | 0.014           | 0           | 0.014     | 0     | 0       | 0.211           | 0           | 0         | 0     | 0       | 0.063           | 0           | 0         | 0     | 0       | 0.070           | 0           | 0         | 0     | 0     |   |
| Cotingidae   | <i>Cotinga cayana</i>              | 0.070   | 0.064           | 0           | 0.064     | 0     | 0       | 0.667           | 0           | 0.667     | 0.667 | 0       | 0.163           | 0           | 0         | 0     | 0       | 0.064           | 0           | 0         | 0     | 0     |   |
| Cotingidae   | <i>Cotinga maynana</i>             | 0.023   | 0.003           | 0           | 0.003     | 0     | 0.271   | 0.962           | 0.962       | 0.962     | 0.962 | 0       | 0.057           | 0           | 0         | 0     | 0       | 0.003           | 0           | 0         | 0     | 0     |   |
| Cotingidae   | <i>Gymnoderus foetidus</i>         | 0.010   | 0.010           | 0           | 0.010     | 0     | 0       | 0.006           | 0           | 0         | 0     | 0       | 0.002           | 0           | 0         | 0     | 0       | 0.003           | 0           | 0         | 0     | 0     |   |
| Cotingidae   | <i>Iodopleura isabellae</i>        | 0.842   | 0.116           | 0           | 0.116     | 0     | 0       | 0.920           | 0           | 0.920     | 0.920 | 0       | 0.014           | 0           | 0         | 0     | 0       | 0.003           | 0           | 0         | 0     | 0     |   |
| Cotingidae   | <i>Laniocera hypopyrra</i>         | 0.016   | 0.015           | 0           | 0.015     | 0     | 0       | 0.691           | 0           | 0.691     | 0.691 | 0       | 0.019           | 0           | 0         | 0     | 0       | 0.015           | 0           | 0         | 0     | 0     |   |
| Cotingidae   | <i>Lipaugus vociferans</i>         | 0.041   | 0.009           | 0           | 0.009     | 0     | 0       | 0.045           | 0           | 0.045     | 0.045 | 0       | 0.002           | 0           | 0         | 0     | 0       | 0.002           | 0           | 0         | 0     | 0     |   |
| Cotingidae   | <i>Oxyruncus cristatus</i>         | 0       | 0.155           | 0           | 0         | 0     | 0.729   | 0.618           | 0           | 0.618     | 0     | 0       | 0.547           | 0           | 0.547     | 0.547 | 0       | 0.809           | 0           | 0         | 0     | 0     |   |
| Cotingidae   | <i>Pipreola arcuata</i>            | 0       | 0.001           | 0           | 0         | 0     | 0       | 0.029           | 0           | 0         | 0     | 0       | 0.114           | 0           | 0         | 0     | 0.906   | 0.043           | 0           | 0.043     | 0     | 0     |   |
| Cotingidae   | <i>Pipreola frontalis</i>          | 0       | 0.036           | 0           | 0         | 0     | 0.926   | 0.865           | 0           | 0.865     | 0     | 0.913   | 0.921           | 0.921       | 0.921     | 0.921 | 0       | 0.922           | 0           | 0.922     | 0.922 | 0.922 |   |
| Cotingidae   | <i>Pipreola intermedia</i>         | 0       | 0.003           | 0           | 0         | 0     | 0       | 0.009           | 0           | 0         | 0     | 0.036   | 0.010           | 0           | 0.010     | 0     | 0.054   | 0.030           | 0.030       | 0.030     | 0.030 | 0.030 |   |
| Cotingidae   | <i>Porphyrolaema porphyrolaema</i> | 0       | 0.049           | 0           | 0.049     | 0     | 0       | 0.491           | 0           | 0         | 0     | 0       | 0.120           | 0           | 0         | 0     | 0       | 0.047           | 0           | 0         | 0     | 0     |   |
| Cotingidae   | <i>Querula purpurata</i>           | 0.021   | 0.030           | 0           | 0.030     | 0     | 0.436   | 0.932           | 0.932       | 0.932     | 0.932 | 0       | 0.950           | 0           | 0         | 0     | 0       | 0.573           | 0           | 0         | 0     | 0     |   |
| Cotingidae   | <i>Rupicola peruvianus</i>         | 0       | 0.003           | 0           | 0         | 0     | 0.996   | 0.766           | 0           | 0.766     | 0     | 0.995   | 0.998           | 0.998       | 0.998     | 0.998 | 0.909   | 0.988           | 0.988       | 0.988     | 0.988 | 0.988 |   |
| Cotingidae   | <i>Snowornis subalaris</i>         | 0       | 0.010           | 0           | 0         | 0     | 0.976   | 0.956           | 0           | 0.956     | 0     | 0       | 0.969           | 0           | 0.969     | 0.969 | 0       | 0.920           | 0           | 0         | 0     | 0     |   |
| Cotingidae   | <i>Tityra cayana</i>               | 0       | 0.027           | 0           | 0.027     | 0     | 0       | 0.063           | 0           | 0         | 0     | 0       | 0.036           | 0           | 0         | 0     | 0       | 0.004           | 0           | 0         | 0     | 0     |   |
| Cotingidae   | <i>Tityra inquisitor</i>           | 0.856   | 0.061           | 0           | 0.061     | 0     | 0       | 0.669           | 0           | 0.669     | 0.669 | 0       | 0.951           | 0           | 0         | 0     | 0       | 0.508           | 0           | 0         | 0     | 0     |   |

|                |                                    |       |       |   |       |   |       |       |       |       |       |       |       |       |       |       |       |       |       |       |       |
|----------------|------------------------------------|-------|-------|---|-------|---|-------|-------|-------|-------|-------|-------|-------|-------|-------|-------|-------|-------|-------|-------|-------|
| Cotingidae     | <i>Tityra semifasciata</i>         | 0.424 | 0.600 | 0 | 0.600 | 0 | 0.967 | 0.968 | 0.968 | 0.968 | 0.968 | 0.984 | 0.913 | 0.913 | 0.913 | 0.913 | 0     | 0.669 | 0     | 0     | 0     |
| Cracidae       | <i>Aburria aburri</i>              | 0     | 0.017 | 0 | 0     | 0 | 0.985 | 0.988 | 0     | 0.988 | 0     | 0.995 | 0.999 | 0.999 | 0.999 | 0.999 | 0     | 0.988 | 0     | 0.988 | 0.988 |
| Cracidae       | <i>Mitu tuberosum</i>              | 0.903 | 0.034 | 0 | 0.034 | 0 | 0.044 | 0.972 | 0.972 | 0.972 | 0.972 | 0     | 0.028 | 0     | 0     | 0     | 0     | 0.002 | 0     | 0     | 0     |
| Cracidae       | <i>Ortalis guttata</i>             | 0.577 | 0.006 | 0 | 0.006 | 0 | 0.978 | 0.769 | 0.769 | 0.769 | 0.769 | 0.136 | 0.968 | 0.968 | 0.968 | 0.968 | 0     | 0.743 | 0     | 0     | 0     |
| Cracidae       | <i>Penelope jacquacu</i>           | 0.078 | 0.006 | 0 | 0.006 | 0 | 0.139 | 0.130 | 0.130 | 0.130 | 0.130 | 0.004 | 0.337 | 0.337 | 0.337 | 0.337 | 0     | 0.048 | 0     | 0     | 0     |
| Cracidae       | <i>Penelope montagnii</i>          | 0     | 0.007 | 0 | 0     | 0 | 0.224 | 0.014 | 0     | 0.014 | 0     | 0.109 | 0.123 | 0.123 | 0.123 | 0.123 | 0.491 | 0.686 | 0.686 | 0.686 | 0.686 |
| Cracidae       | <i>Pipile cumanensis</i>           | 0.113 | 0.012 | 0 | 0.012 | 0 | 0     | 0.948 | 0     | 0     | 0     | 0     | 0.006 | 0     | 0     | 0     | 0     | 0.005 | 0     | 0     | 0     |
| Icteridae      | <i>Cacicus cela</i>                | 0.789 | 0.023 | 0 | 0.023 | 0 | 0.008 | 0.700 | 0.700 | 0.700 | 0.700 | 0     | 0.014 | 0     | 0     | 0     | 0     | 0.013 | 0     | 0     | 0     |
| Icteridae      | <i>Cacicus chrysonotus</i>         | 0     | 0.002 | 0 | 0     | 0 | 0     | 0.077 | 0     | 0     | 0     | 0     | 0.700 | 0     | 0     | 0     | 0     | 0.119 | 0     | 0     | 0     |
| Icteridae      | <i>Cacicus haemorrhous</i>         | 0.006 | 0.206 | 0 | 0.206 | 0 | 0.007 | 0.022 | 0.022 | 0.022 | 0.022 | 0     | 0.028 | 0     | 0     | 0     | 0     | 0.003 | 0     | 0     | 0     |
| Icteridae      | <i>Clypicterus oseryi</i>          | 0.988 | 0.058 | 0 | 0.058 | 0 | 0     | 0.195 | 0     | 0.195 | 0.195 | 0     | 0.101 | 0     | 0     | 0     | 0     | 0.036 | 0     | 0     | 0     |
| Icteridae      | <i>Icterus icterus</i>             | 0.074 | 0.028 | 0 | 0.028 | 0 | 0     | 0.040 | 0     | 0.040 | 0.040 | 0     | 0.042 | 0     | 0     | 0     | 0     | 0.066 | 0     | 0     | 0     |
| Icteridae      | <i>Molothrus oryzivorus</i>        | 0.216 | 0.115 | 0 | 0.115 | 0 | 0     | 0.896 | 0     | 0.896 | 0.896 | 0     | 0.400 | 0     | 0     | 0     | 0     | 0.885 | 0     | 0     | 0     |
| Icteridae      | <i>Psarocolius angustifrons</i>    | 0.244 | 0.009 | 0 | 0.009 | 0 | 0.493 | 0.813 | 0.813 | 0.813 | 0.813 | 0.073 | 0.784 | 0.784 | 0.784 | 0.784 | 0.707 | 0.954 | 0.954 | 0.954 | 0.954 |
| Icteridae      | <i>Psarocolius atrovirens</i>      | 0     | 0.002 | 0 | 0     | 0 | 0.699 | 0.707 | 0     | 0.707 | 0     | 0.775 | 0.981 | 0.981 | 0.981 | 0.981 | 0.551 | 0.922 | 0.922 | 0.922 | 0.922 |
| Icteridae      | <i>Psarocolius bifasciatus</i>     | 0.932 | 0.066 | 0 | 0.066 | 0 | 0     | 0.346 | 0     | 0.346 | 0.346 | 0     | 0.807 | 0     | 0     | 0     | 0     | 0.016 | 0     | 0     | 0     |
| Icteridae      | <i>Psarocolius decumanus</i>       | 0.892 | 0.499 | 0 | 0.499 | 0 | 0.978 | 0.653 | 0.653 | 0.653 | 0.653 | 0     | 0.943 | 0     | 0.943 | 0.943 | 0     | 0.914 | 0     | 0     | 0     |
| Odontophoridae | <i>Odontophorus balliviani</i>     | 0     | 0.040 | 0 | 0     | 0 | 0.148 | 0.030 | 0     | 0.030 | 0     | 0.956 | 0.065 | 0.065 | 0.065 | 0.065 | 0.955 | 0.420 | 0.420 | 0.420 | 0.420 |
| Odontophoridae | <i>Odontophorus speciosus</i>      | 0     | 0.007 | 0 | 0     | 0 | 0.981 | 0.064 | 0     | 0.064 | 0     | 0.828 | 0.986 | 0.986 | 0.986 | 0.986 | 0.418 | 0.968 | 0.968 | 0.968 | 0.968 |
| Odontophoridae | <i>Odontophorus stellatus</i>      | 0.016 | 0.008 | 0 | 0.008 | 0 | 0.253 | 0.431 | 0.431 | 0.431 | 0.431 | 0     | 0.253 | 0     | 0     | 0     | 0     | 0.170 | 0     | 0     | 0     |
| Picidae        | <i>Celeus elegans</i>              | 0.109 | 0.031 | 0 | 0.031 | 0 | 0     | 0.008 | 0     | 0     | 0     | 0     | 0.003 | 0     | 0     | 0     | 0     | 0.003 | 0     | 0     | 0     |
| Picidae        | <i>Celeus flavus</i>               | 0.201 | 0.173 | 0 | 0.173 | 0 | 0     | 0.107 | 0     | 0     | 0     | 0     | 0.010 | 0     | 0     | 0     | 0     | 0.008 | 0     | 0     | 0     |
| Picidae        | <i>Celeus grammicus</i>            | 0.791 | 0.621 | 0 | 0.621 | 0 | 0.030 | 0.138 | 0.138 | 0.138 | 0.138 | 0     | 0.033 | 0     | 0.033 | 0.033 | 0     | 0.016 | 0     | 0     | 0     |
| Picidae        | <i>Celeus spectabilis</i>          | 0.201 | 0.000 | 0 | 0     | 0 | 0     | 0.570 | 0     | 0     | 0     | 0     | 0.303 | 0     | 0     | 0     | 0     | 0.187 | 0     | 0     | 0     |
| Picidae        | <i>Celeus torquatus</i>            | 0.190 | 0.152 | 0 | 0.152 | 0 | 0     | 0.016 | 0     | 0     | 0     | 0     | 0.010 | 0     | 0     | 0     | 0     | 0.011 | 0     | 0     | 0     |
| Picidae        | <i>Colaptes rubiginosus</i>        | 0     | 0.005 | 0 | 0     | 0 | 0.985 | 0.804 | 0     | 0.804 | 0     | 0.995 | 0.978 | 0.978 | 0.978 | 0.978 | 0.986 | 0.821 | 0.821 | 0.821 | 0.821 |
| Pipridae       | <i>Chiroxiphia boliviana</i>       | 0     | 0.007 | 0 | 0     | 0 | 0.142 | 0.121 | 0     | 0.121 | 0     | 0.123 | 0.883 | 0.883 | 0.883 | 0.883 | 0.028 | 0.198 | 0.198 | 0.198 | 0.198 |
| Pipridae       | <i>Chiroxiphia pareola</i>         | 0.463 | 0.236 | 0 | 0.236 | 0 | 0     | 0.771 | 0     | 0.771 | 0.771 | 0     | 0.085 | 0     | 0     | 0     | 0     | 0.043 | 0     | 0     | 0     |
| Pipridae       | <i>Lepidothrix coerulescapilla</i> | 0     | 0.007 | 0 | 0     | 0 | 0.972 | 0.448 | 0     | 0.448 | 0     | 0.044 | 0.993 | 0.993 | 0.993 | 0.993 | 0     | 0.573 | 0     | 0.573 | 0.573 |
| Pipridae       | <i>Lepidothrix coronata</i>        | 0.825 | 0.579 | 0 | 0.579 | 0 | 0     | 0.774 | 0     | 0.774 | 0.774 | 0     | 0.465 | 0     | 0     | 0     | 0     | 0.035 | 0     | 0     | 0     |
| Pipridae       | <i>Machaeropterus pyrocephalus</i> | 0.074 | 0.005 | 0 | 0.005 | 0 | 0.240 | 0.984 | 0.984 | 0.984 | 0.984 | 0     | 0.064 | 0     | 0.064 | 0.064 | 0     | 0.023 | 0     | 0     | 0     |
| Pipridae       | <i>Manacus manacus</i>             | 0.895 | 0.495 | 0 | 0.495 | 0 | 0     | 0.908 | 0     | 0.908 | 0.908 | 0     | 0.930 | 0     | 0     | 0     | 0     | 0.835 | 0     | 0     | 0     |
| Pipridae       | <i>Neopelma sulphureiventer</i>    | 0.311 | 0.137 | 0 | 0.137 | 0 | 0     | 0.077 | 0     | 0     | 0     | 0     | 0.035 | 0     | 0     | 0     | 0     | 0.037 | 0     | 0     | 0     |
| Pipridae       | <i>Pipra chloromeros</i>           | 0.409 | 0.013 | 0 | 0.013 | 0 | 0.851 | 0.925 | 0.925 | 0.925 | 0.925 | 0     | 0.783 | 0     | 0.783 | 0.783 | 0     | 0.432 | 0     | 0     | 0     |
| Pipridae       | <i>Pipra fasciicauda</i>           | 0.005 | 0.003 | 0 | 0.003 | 0 | 0.413 | 0.804 | 0.804 | 0.804 | 0.804 | 0     | 0.641 | 0     | 0     | 0     | 0     | 0.006 | 0     | 0     | 0     |
| Pipridae       | <i>Xenopipo holochlora</i>         | 0.983 | 0.262 | 0 | 0.262 | 0 | 0.799 | 0.990 | 0.990 | 0.990 | 0.990 | 0     | 0.960 | 0     | 0     | 0     | 0     | 0.812 | 0     | 0     | 0     |
| Pipridae       | <i>Xenopipo unicolor</i>           | 0     | 0.002 | 0 | 0     | 0 | 0.500 | 0.133 | 0     | 0.133 | 0     | 0.916 | 0.837 | 0.837 | 0.837 | 0.837 | 0     | 0.475 | 0     | 0.475 | 0.475 |
| Psittacidae    | <i>Amazona farinosa</i>            | 0.033 | 0.071 | 0 | 0.071 | 0 | 0.034 | 0.302 | 0.302 | 0.302 | 0.302 | 0     | 0.344 | 0     | 0.344 | 0.344 | 0     | 0.009 | 0     | 0     | 0     |
| Psittacidae    | <i>Amazona mercenaria</i>          | 0     | 0.028 | 0 | 0     | 0 | 0.974 | 0.659 | 0     | 0.659 | 0     | 0.974 | 0.970 | 0.970 | 0.970 | 0.970 | 0.977 | 0.976 | 0.976 | 0.976 | 0.976 |
| Psittacidae    | <i>Amazona ochrocephala</i>        | 0.009 | 0.018 | 0 | 0.018 | 0 | 0     | 0.194 | 0     | 0.194 | 0.194 | 0     | 0.018 | 0     | 0     | 0     | 0     | 0.012 | 0     | 0     | 0     |
| Psittacidae    | <i>Ara ararauna</i>                | 0.506 | 0.034 | 0 | 0.034 | 0 | 0.010 | 0.098 | 0.098 | 0.098 | 0.098 | 0     | 0.070 | 0     | 0     | 0     | 0     | 0.022 | 0     | 0     | 0     |
| Psittacidae    | <i>Ara chloropterus</i>            | 0.079 | 0.033 | 0 | 0.033 | 0 | 0.004 | 0.063 | 0.063 | 0.063 | 0.063 | 0     | 0.007 | 0     | 0.007 | 0.007 | 0     | 0.019 | 0     | 0     | 0     |
| Psittacidae    | <i>Ara macao</i>                   | 0.007 | 0.020 | 0 | 0.020 | 0 | 0.070 | 0.035 | 0.035 | 0.035 | 0.035 | 0     | 0.077 | 0     | 0     | 0     | 0     | 0.042 | 0     | 0     | 0     |
| Psittacidae    | <i>Ara militaris</i>               | 0     | 0.045 | 0 | 0     | 0 | 0.994 | 0.971 | 0.971 | 0.971 | 0.971 | 0.747 | 0.994 | 0.994 | 0.994 | 0.994 | 0     | 0.587 | 0     | 0.587 | 0.587 |
| Psittacidae    | <i>Ara severus</i>                 | 0.114 | 0.712 | 0 | 0.712 | 0 | 0.120 | 0.102 | 0.102 | 0.102 | 0.102 | 0     | 0.862 | 0     | 0.862 | 0.862 | 0     | 0.015 | 0     | 0     | 0     |
| Psittacidae    | <i>Aratinga leucophthalma</i>      | 0.019 | 0.011 | 0 | 0.011 | 0 | 0.021 | 0.181 | 0.181 | 0.181 | 0.181 | 0.006 | 0.149 | 0.149 | 0.149 | 0.149 | 0     | 0.007 | 0     | 0.007 | 0.007 |
| Psittacidae    | <i>Aratinga mitrata</i>            | 0     | 0.001 | 0 | 0     | 0 | 0     | 0.001 | 0     | 0     | 0     | 0     | 0.004 | 0     | 0     | 0     | 0.001 | 0.008 | 0.008 | 0.008 | 0.008 |
| Psittacidae    | <i>Aratinga weddellii</i>          | 0.179 | 0.015 | 0 | 0.015 | 0 | 0     | 0.569 | 0     | 0.569 | 0.569 | 0     | 0.105 | 0     | 0     | 0     | 0     | 0.004 | 0     | 0     | 0     |
| Psittacidae    | <i>Bolborhynchus lineola</i>       | 0     | 0.042 | 0 | 0     | 0 | 0     | 0.118 | 0     | 0     | 0     | 0.766 | 0.609 | 0.609 | 0.609 | 0.609 | 0.800 | 0.632 | 0.632 | 0.632 | 0.632 |
| Psittacidae    | <i>Bolborhynchus orbynesius</i>    | 0     | 0.011 | 0 | 0     | 0 | 0     | 0.014 | 0     | 0     | 0     | 0     | 0.050 | 0     | 0     | 0     | 0     | 0.067 | 0     | 0     | 0     |

|                 |                                       |       |       |   |       |   |       |       |       |       |       |       |       |       |       |       |       |       |       |       |       |
|-----------------|---------------------------------------|-------|-------|---|-------|---|-------|-------|-------|-------|-------|-------|-------|-------|-------|-------|-------|-------|-------|-------|-------|
| Psittacidae     | <i>Brotogeris cyanoptera</i>          | 0.052 | 0.007 | 0 | 0.007 | 0 | 0     | 0.154 | 0     | 0     | 0     | 0     | 0.010 | 0     | 0     | 0     | 0     | 0.002 | 0     | 0     | 0     |
| Psittacidae     | <i>Brotogeris sanctithomae</i>        | 0.041 | 0.184 | 0 | 0.184 | 0 | 0     | 0.059 | 0     | 0     | 0     | 0     | 0.059 | 0     | 0     | 0     | 0     | 0.031 | 0     | 0     | 0     |
| Psittacidae     | <i>Forpus modestus</i>                | 0.017 | 0.017 | 0 | 0.017 | 0 | 0     | 0.348 | 0     | 0     | 0     | 0     | 0.360 | 0     | 0     | 0     | 0     | 0.129 | 0     | 0     | 0     |
| Psittacidae     | <i>Nannopsittaca dachilleae</i>       | 0.263 | 0.992 | 0 | 0.992 | 0 | 0.009 | 0.010 | 0.010 | 0.010 | 0.010 | 0     | 0.016 | 0     | 0     | 0     | 0     | 0.002 | 0     | 0     | 0     |
| Psittacidae     | <i>Orthopsittaca manilata</i>         | 0.098 | 0.007 | 0 | 0.007 | 0 | 0     | 0.221 | 0     | 0.221 | 0.221 | 0     | 0.019 | 0     | 0     | 0     | 0     | 0.005 | 0     | 0     | 0     |
| Psittacidae     | <i>Pionites leucogaster</i>           | 0.004 | 0.000 | 0 | 0     | 0 | 0     | 0.000 | 0     | 0     | 0     | 0     | 0.000 | 0     | 0     | 0     | 0     | 0.000 | 0     | 0     | 0     |
| Psittacidae     | <i>Pionus menstruus</i>               | 0.137 | 0.161 | 0 | 0.161 | 0 | 0.489 | 0.518 | 0.518 | 0.518 | 0.518 | 0.078 | 0.546 | 0.546 | 0.546 | 0.546 | 0.653 | 0.039 | 0.039 | 0.039 | 0.039 |
| Psittacidae     | <i>Pionus tumultuosus</i>             | 0     | 0.041 | 0 | 0     | 0 | 0     | 0.048 | 0     | 0     | 0     | 0.959 | 0.029 | 0.029 | 0.029 | 0.029 | 0.989 | 0.076 | 0.076 | 0.076 | 0.076 |
| Psittacidae     | <i>Primolius couloni</i>              | 0.109 | 0.006 | 0 | 0.006 | 0 | 0.050 | 0.975 | 0.975 | 0.975 | 0.975 | 0     | 0.020 | 0     | 0.020 | 0.020 | 0     | 0.029 | 0     | 0     | 0     |
| Psittacidae     | <i>Pyrilia barrabandi</i>             | 0.006 | 0.006 | 0 | 0.006 | 0 | 0     | 0.007 | 0     | 0     | 0     | 0     | 0.006 | 0     | 0     | 0     | 0     | 0.006 | 0     | 0     | 0     |
| Psittacidae     | <i>Pyrrhura roseifrons</i>            | 0.005 | 0.005 | 0 | 0.005 | 0 | 0.005 | 0.646 | 0.646 | 0.646 | 0.646 | 0     | 0.005 | 0     | 0     | 0     | 0     | 0.005 | 0     | 0     | 0     |
| Psittacidae     | <i>Pyrrhura rupicola</i>              | 0.018 | 0.018 | 0 | 0.018 | 0 | 0.433 | 0.508 | 0.508 | 0.508 | 0.508 | 0     | 0.226 | 0     | 0     | 0     | 0     | 0.213 | 0     | 0     | 0     |
| Psittacidae     | <i>Touit huetii</i>                   | 0.264 | 0.318 | 0 | 0.318 | 0 | 0.005 | 0.018 | 0.018 | 0.018 | 0.018 | 0     | 0.007 | 0     | 0.007 | 0.007 | 0     | 0.005 | 0     | 0     | 0     |
| Psophiidae      | <i>Sophia leucoptera</i>              | 0.995 | 0.274 | 0 | 0.274 | 0 | 0.057 | 0.563 | 0.563 | 0.563 | 0.563 | 0     | 0.061 | 0     | 0     | 0     | 0     | 0.028 | 0     | 0     | 0     |
| Ramphastidae    | <i>Andigena hypoglauc</i>             | 0     | 0.003 | 0 | 0     | 0 | 0     | 0.003 | 0     | 0     | 0     | 0.017 | 0.003 | 0     | 0.003 | 0     | 0.008 | 0.003 | 0.003 | 0.003 | 0.003 |
| Ramphastidae    | <i>Aulacorhynchus coeruleicinctis</i> | 0     | 0.009 | 0 | 0     | 0 | 0     | 0.010 | 0     | 0     | 0     | 0.915 | 0.871 | 0.871 | 0.871 | 0.871 | 0.707 | 0.928 | 0.928 | 0.928 | 0.928 |
| Ramphastidae    | <i>Aulacorhynchus derbianus</i>       | 0     | 0.359 | 0 | 0     | 0 | 0.984 | 0.984 | 0     | 0.984 | 0     | 0.705 | 0.981 | 0.981 | 0.981 | 0.981 | 0     | 0.949 | 0     | 0.949 | 0.949 |
| Ramphastidae    | <i>Aulacorhynchus prasinus</i>        | 0.116 | 0.001 | 0 | 0.001 | 0 | 0.937 | 0.976 | 0.976 | 0.976 | 0.976 | 0.948 | 0.841 | 0.841 | 0.841 | 0.841 | 0     | 0.766 | 0     | 0     | 0     |
| Ramphastidae    | <i>Capito auratus</i>                 | 0.079 | 0.008 | 0 | 0.008 | 0 | 0.018 | 0.143 | 0.143 | 0.143 | 0.143 | 0     | 0.014 | 0     | 0.014 | 0.014 | 0     | 0.010 | 0     | 0     | 0     |
| Ramphastidae    | <i>Eubucco richardsoni</i>            | 0.961 | 0.012 | 0 | 0.012 | 0 | 0.376 | 0.949 | 0.949 | 0.949 | 0.949 | 0     | 0.582 | 0     | 0     | 0     | 0     | 0.039 | 0     | 0     | 0     |
| Ramphastidae    | <i>Eubucco tucinkae</i>               | 0.602 | 0.073 | 0 | 0.073 | 0 | 0     | 0.997 | 0     | 0.997 | 0.997 | 0     | 0.112 | 0     | 0     | 0     | 0     | 0.086 | 0     | 0     | 0     |
| Ramphastidae    | <i>Eubucco versicolor</i>             | 0     | 0.246 | 0 | 0     | 0 | 0.909 | 0.167 | 0     | 0.167 | 0     | 0.063 | 0.849 | 0.849 | 0.849 | 0.849 | 0.004 | 0.753 | 0.753 | 0.753 | 0.753 |
| Ramphastidae    | <i>Pteroglossus azara</i>             | 0.887 | 0.075 | 0 | 0.075 | 0 | 0.034 | 0.976 | 0.976 | 0.976 | 0.976 | 0     | 0.013 | 0     | 0.013 | 0.013 | 0     | 0.012 | 0     | 0     | 0     |
| Ramphastidae    | <i>Pteroglossus beauharnaesii</i>     | 0.096 | 0.015 | 0 | 0.015 | 0 | 0     | 0.236 | 0     | 0.236 | 0.236 | 0     | 0.005 | 0     | 0     | 0     | 0     | 0.004 | 0     | 0     | 0     |
| Ramphastidae    | <i>Pteroglossus castanotis</i>        | 0.645 | 0.017 | 0 | 0.017 | 0 | 0.135 | 0.414 | 0.414 | 0.414 | 0.414 | 0     | 0.093 | 0     | 0     | 0     | 0     | 0.050 | 0     | 0     | 0     |
| Ramphastidae    | <i>Pteroglossus inscriptus</i>        | 0.384 | 0.037 | 0 | 0.037 | 0 | 0     | 0.829 | 0     | 0     | 0     | 0     | 0.027 | 0     | 0     | 0     | 0     | 0.021 | 0     | 0     | 0     |
| Ramphastidae    | <i>Ramphastos tucanus</i>             | 0.007 | 0.015 | 0 | 0.015 | 0 | 0     | 0.012 | 0     | 0.012 | 0.012 | 0     | 0.040 | 0     | 0     | 0     | 0     | 0.179 | 0     | 0     | 0     |
| Ramphastidae    | <i>Ramphastos vitellinus</i>          | 0.204 | 0.204 | 0 | 0.204 | 0 | 0     | 0.283 | 0     | 0     | 0     | 0     | 0.009 | 0     | 0     | 0     | 0     | 0.122 | 0     | 0     | 0     |
| Ramphastidae    | <i>Selenidera reinwardtii</i>         | 0.909 | 0.084 | 0 | 0.084 | 0 | 0.154 | 0.686 | 0.686 | 0.686 | 0.686 | 0.001 | 0.064 | 0.064 | 0.064 | 0.064 | 0     | 0.007 | 0     | 0.007 | 0.007 |
| Steatornithidae | <i>Steatornis caripensis</i>          | 0.992 | 0.056 | 0 | 0.056 | 0 | 0     | 0.966 | 0     | 0.966 | 0.966 | 0     | 0.818 | 0     | 0     | 0     | 0     | 0.983 | 0     | 0     | 0     |
| Thraupidae      | <i>Anisognathus igniventris</i>       | 0     | 0.003 | 0 | 0     | 0 | 0     | 0.203 | 0     | 0     | 0     | 0     | 0.185 | 0     | 0     | 0     | 0     | 0.018 | 0     | 0     | 0     |
| Thraupidae      | <i>Anisognathus somptuosus</i>        | 0     | 0.004 | 0 | 0     | 0 | 0     | 0.052 | 0     | 0     | 0     | 0.684 | 0.871 | 0     | 0.871 | 0     | 0.998 | 0.414 | 0.414 | 0.414 | 0.414 |
| Thraupidae      | <i>Buthraupis montana</i>             | 0     | 0.006 | 0 | 0     | 0 | 0     | 0.232 | 0     | 0     | 0     | 0     | 0.154 | 0     | 0     | 0     | 0     | 0.006 | 0     | 0     | 0     |
| Thraupidae      | <i>Catamblyrhynchus diadema</i>       | 0     | 0.010 | 0 | 0     | 0 | 0     | 0.031 | 0     | 0     | 0     | 0     | 0.129 | 0     | 0     | 0     | 0.862 | 0.119 | 0     | 0.119 | 0     |
| Thraupidae      | <i>Chlorochrysa calliparaea</i>       | 0     | 0.007 | 0 | 0     | 0 | 0.876 | 0.745 | 0     | 0.745 | 0     | 0.585 | 0.925 | 0.925 | 0.925 | 0.925 | 0.988 | 0.119 | 0.119 | 0.119 | 0.119 |
| Thraupidae      | <i>Chlorophanes spiza</i>             | 0.924 | 0.501 | 0 | 0.501 | 0 | 0.960 | 0.930 | 0.930 | 0.930 | 0.930 | 0     | 0.514 | 0     | 0.514 | 0.514 | 0     | 0.935 | 0     | 0     | 0     |
| Thraupidae      | <i>Chlorophonia cyanea</i>            | 0.051 | 0.004 | 0 | 0.004 | 0 | 0.913 | 0.339 | 0.339 | 0.339 | 0.339 | 0.993 | 0.904 | 0.904 | 0.904 | 0.904 | 0.335 | 0.900 | 0.900 | 0.900 | 0.900 |
| Thraupidae      | <i>Chlorornis riefferii</i>           | 0     | 0.003 | 0 | 0     | 0 | 0     | 0.323 | 0     | 0     | 0     | 0     | 0.798 | 0     | 0     | 0     | 0     | 0.658 | 0     | 0     | 0     |
| Thraupidae      | <i>Chlorospingus canigularis</i>      | 0     | 0.006 | 0 | 0     | 0 | 0.970 | 0.444 | 0     | 0.444 | 0     | 0.881 | 0.812 | 0.812 | 0.812 | 0.812 | 0     | 0.916 | 0     | 0     | 0     |
| Thraupidae      | <i>Chlorospingus flavigularis</i>     | 0     | 0.010 | 0 | 0     | 0 | 0.985 | 0.662 | 0     | 0.662 | 0     | 0.995 | 0.992 | 0.992 | 0.992 | 0.992 | 0.985 | 0.994 | 0.994 | 0.994 | 0.994 |
| Thraupidae      | <i>Chlorospingus ophthalmicus</i>     | 0     | 0.002 | 0 | 0     | 0 | 0.974 | 0.358 | 0     | 0.358 | 0     | 0.129 | 0.289 | 0.289 | 0.289 | 0.289 | 0.166 | 0.209 | 0.209 | 0.209 | 0.209 |
| Thraupidae      | <i>Chlorospingus parvirostris</i>     | 0     | 0.007 | 0 | 0     | 0 | 0     | 0.148 | 0     | 0     | 0     | 0.966 | 0.929 | 0.929 | 0.929 | 0.929 | 0.951 | 0.710 | 0.710 | 0.710 | 0.710 |
| Thraupidae      | <i>Cissopis leverianus</i>            | 0.982 | 0.020 | 0 | 0.020 | 0 | 0.971 | 0.965 | 0.965 | 0.965 | 0.965 | 0.010 | 0.856 | 0.856 | 0.856 | 0.856 | 0     | 0.030 | 0     | 0     | 0     |
| Thraupidae      | <i>Conirostrum cinereum</i>           | 0     | 0.003 | 0 | 0     | 0 | 0     | 0.056 | 0     | 0     | 0     | 0     | 0.078 | 0     | 0     | 0     | 0     | 0.013 | 0     | 0     | 0     |
| Thraupidae      | <i>Conirostrum speciosum</i>          | 0.016 | 0.010 | 0 | 0.010 | 0 | 0     | 0.105 | 0     | 0.105 | 0.105 | 0     | 0.164 | 0     | 0     | 0     | 0     | 0.136 | 0     | 0     | 0     |
| Thraupidae      | <i>Cyanerpes caeruleus</i>            | 0.868 | 0.111 | 0 | 0.111 | 0 | 0.665 | 0.579 | 0.579 | 0.579 | 0.579 | 0     | 0.835 | 0     | 0.835 | 0.835 | 0     | 0.865 | 0     | 0     | 0     |
| Thraupidae      | <i>Cyanerpes cyaneus</i>              | 0.018 | 0.107 | 0 | 0.107 | 0 | 0.005 | 0.083 | 0.083 | 0.083 | 0.083 | 0     | 0.007 | 0     | 0     | 0     | 0     | 0.013 | 0     | 0     | 0     |
| Thraupidae      | <i>Dacnis cayana</i>                  | 0.952 | 0.736 | 0 | 0.736 | 0 | 0.840 | 0.838 | 0.838 | 0.838 | 0.838 | 0.093 | 0.216 | 0.216 | 0.216 | 0.216 | 0     | 0.492 | 0     | 0     | 0     |
| Thraupidae      | <i>Dacnis flaviventer</i>             | 0.894 | 0.263 | 0 | 0.263 | 0 | 0.209 | 0.950 | 0.950 | 0.950 | 0.950 | 0     | 0.099 | 0     | 0     | 0     | 0     | 0.020 | 0     | 0     | 0     |
| Thraupidae      | <i>Dacnis lineata</i>                 | 0.344 | 0.088 | 0 | 0.088 | 0 | 0.893 | 0.990 | 0.990 | 0.990 | 0.990 | 0     | 0.543 | 0     | 0.543 | 0.543 | 0     | 0.352 | 0     | 0     | 0     |

|            |                                     |       |       |   |       |   |       |       |       |       |       |       |       |       |       |       |       |       |       |       |       |
|------------|-------------------------------------|-------|-------|---|-------|---|-------|-------|-------|-------|-------|-------|-------|-------|-------|-------|-------|-------|-------|-------|-------|
| Thraupidae | <i>Delothraupis castaneiventris</i> | 0     | 0.004 | 0 | 0     | 0 | 0     | 0.032 | 0     | 0     | 0     | 0     | 0.240 | 0     | 0     | 0     | 0     | 0.130 | 0     | 0     | 0     |
| Thraupidae | <i>Diglossa brunneiventris</i>      | 0     | 0.001 | 0 | 0     | 0 | 0     | 0.001 | 0     | 0     | 0     | 0     | 0.001 | 0     | 0     | 0     | 0     | 0.001 | 0     | 0     | 0     |
| Thraupidae | <i>Diglossa caerulescens</i>        | 0     | 0.004 | 0 | 0     | 0 | 0     | 0.006 | 0     | 0     | 0     | 0.041 | 0.992 | 0     | 0.992 | 0     | 0.021 | 0.860 | 0.860 | 0.860 | 0.860 |
| Thraupidae | <i>Diglossa cyanea</i>              | 0     | 0.002 | 0 | 0     | 0 | 0     | 0.090 | 0     | 0     | 0     | 0.075 | 0.015 | 0     | 0.015 | 0     | 0.982 | 0.147 | 0.147 | 0.147 | 0.147 |
| Thraupidae | <i>Diglossa glauca</i>              | 0     | 0.049 | 0 | 0     | 0 | 0.986 | 0.882 | 0     | 0.882 | 0     | 0.983 | 0.986 | 0.986 | 0.986 | 0.986 | 0.950 | 0.985 | 0.985 | 0.985 | 0.985 |
| Thraupidae | <i>Diglossa mystacalis</i>          | 0     | 0.001 | 0 | 0     | 0 | 0     | 0.324 | 0     | 0     | 0     | 0     | 0.019 | 0     | 0     | 0     | 0     | 0.008 | 0     | 0     | 0     |
| Thraupidae | <i>Diglossa sittoides</i>           | 0     | 0.002 | 0 | 0     | 0 | 0     | 0.018 | 0     | 0     | 0     | 0     | 0.659 | 0     | 0     | 0     | 0.967 | 0.921 | 0     | 0.921 | 0     |
| Thraupidae | <i>Dubusia taeniata</i>             | 0     | 0.001 | 0 | 0     | 0 | 0     | 0.001 | 0     | 0     | 0     | 0     | 0.009 | 0     | 0     | 0     | 0.106 | 0.008 | 0     | 0.008 | 0     |
| Thraupidae | <i>Euphonia chlorotica</i>          | 0     | 0.019 | 0 | 0.019 | 0 | 0     | 0.070 | 0     | 0     | 0     | 0     | 0.011 | 0     | 0     | 0     | 0     | 0.024 | 0     | 0     | 0     |
| Thraupidae | <i>Euphonia chrysopasta</i>         | 0.882 | 0.062 | 0 | 0.062 | 0 | 0     | 0.918 | 0     | 0.918 | 0.918 | 0     | 0.459 | 0     | 0     | 0     | 0     | 0.318 | 0     | 0     | 0     |
| Thraupidae | <i>Euphonia laniirostris</i>        | 0.020 | 0.152 | 0 | 0.152 | 0 | 0.794 | 0.922 | 0.922 | 0.922 | 0.922 | 0.909 | 0.840 | 0.840 | 0.840 | 0.840 | 0     | 0.901 | 0     | 0     | 0     |
| Thraupidae | <i>Euphonia mesochrysa</i>          | 0     | 0.075 | 0 | 0     | 0 | 0.968 | 0.048 | 0.048 | 0.048 | 0.048 | 0.935 | 0.981 | 0.981 | 0.981 | 0.981 | 0     | 0.805 | 0     | 0.805 | 0.805 |
| Thraupidae | <i>Euphonia minuta</i>              | 0.517 | 0.343 | 0 | 0.343 | 0 | 0.394 | 0.623 | 0.623 | 0.623 | 0.623 | 0     | 0.402 | 0     | 0     | 0     | 0     | 0.343 | 0     | 0     | 0     |
| Thraupidae | <i>Euphonia rufiventris</i>         | 0.157 | 0.236 | 0 | 0.236 | 0 | 0     | 0.855 | 0     | 0.855 | 0.855 | 0     | 0.064 | 0     | 0     | 0     | 0     | 0.014 | 0     | 0     | 0     |
| Thraupidae | <i>Euphonia xanthogaster</i>        | 0.950 | 0.151 | 0 | 0.151 | 0 | 0.988 | 0.510 | 0.510 | 0.510 | 0.510 | 0.655 | 0.862 | 0.862 | 0.862 | 0.862 | 0.914 | 0.973 | 0.973 | 0.973 | 0.973 |
| Thraupidae | <i>Iridophanes pulcherrimus</i>     | 0     | 0.006 | 0 | 0     | 0 | 0     | 0.380 | 0     | 0     | 0     | 0.984 | 0.232 | 0.232 | 0.232 | 0.232 | 0     | 0.672 | 0     | 0.672 | 0.672 |
| Thraupidae | <i>Iridosornis analis</i>           | 0     | 0.011 | 0 | 0     | 0 | 0.983 | 0.323 | 0     | 0.323 | 0     | 0.864 | 0.973 | 0.973 | 0.973 | 0.973 | 0.886 | 0.988 | 0.988 | 0.988 | 0.988 |
| Thraupidae | <i>Iridosornis jelskii</i>          | 0     | 0.018 | 0 | 0     | 0 | 0     | 0.739 | 0     | 0     | 0     | 0     | 0.718 | 0     | 0     | 0     | 0     | 0.464 | 0     | 0     | 0     |
| Thraupidae | <i>Lamprospiza melanoleuca</i>      | 0.004 | 0.004 | 0 | 0.004 | 0 | 0     | 0.008 | 0     | 0.008 | 0.008 | 0     | 0.004 | 0     | 0     | 0     | 0     | 0.004 | 0     | 0     | 0     |
| Thraupidae | <i>Pipraeidea melanonota</i>        | 0.441 | 0.003 | 0 | 0.003 | 0 | 0.510 | 0.073 | 0.073 | 0.073 | 0.073 | 0.310 | 0.625 | 0.625 | 0.625 | 0.625 | 0.480 | 0.681 | 0.681 | 0.681 | 0.681 |
| Thraupidae | <i>Piranga leucoptera</i>           | 0     | 0.085 | 0 | 0     | 0 | 0.963 | 0.522 | 0     | 0.522 | 0     | 0.860 | 0.965 | 0.965 | 0.965 | 0.965 | 0     | 0.294 | 0     | 0.294 | 0.294 |
| Thraupidae | <i>Ramphocelus carbo</i>            | 0.188 | 0.017 | 0 | 0.017 | 0 | 0.366 | 0.343 | 0.343 | 0.343 | 0.343 | 0.103 | 0.053 | 0.053 | 0.053 | 0.053 | 0     | 0.134 | 0     | 0     | 0     |
| Thraupidae | <i>Ramphocelus nigrogularis</i>     | 0.027 | 0.010 | 0 | 0.010 | 0 | 0.070 | 0.861 | 0.861 | 0.861 | 0.861 | 0     | 0.015 | 0     | 0     | 0     | 0     | 0.014 | 0     | 0     | 0     |
| Thraupidae | <i>Schistochlamys melanopis</i>     | 0     | 0.699 | 0 | 0     | 0 | 0.931 | 0.978 | 0.978 | 0.978 | 0.978 | 0.239 | 0.958 | 0.958 | 0.958 | 0.958 | 0.044 | 0.061 | 0.061 | 0.061 | 0.061 |
| Thraupidae | <i>Tachyphonus cristatus</i>        | 0     | 0.340 | 0 | 0.340 | 0 | 0     | 0.329 | 0     | 0     | 0     | 0     | 0.195 | 0     | 0     | 0     | 0     | 0.009 | 0     | 0     | 0     |
| Thraupidae | <i>Tachyphonus rufiventer</i>       | 0.676 | 0.052 | 0 | 0.052 | 0 | 0.982 | 0.993 | 0.993 | 0.993 | 0.993 | 0     | 0.974 | 0     | 0.974 | 0.974 | 0     | 0.847 | 0     | 0     | 0     |
| Thraupidae | <i>Tangara arthus</i>               | 0     | 0.003 | 0 | 0     | 0 | 0.985 | 0.884 | 0.884 | 0.884 | 0.884 | 0.636 | 0.832 | 0.832 | 0.832 | 0.832 | 0     | 0.955 | 0     | 0.955 | 0.955 |
| Thraupidae | <i>Tangara callophrys</i>           | 0.830 | 0.011 | 0 | 0.011 | 0 | 0     | 0.896 | 0     | 0.896 | 0.896 | 0     | 0.019 | 0     | 0     | 0     | 0     | 0.008 | 0     | 0     | 0     |
| Thraupidae | <i>Tangara chilensis</i>            | 0.278 | 0.036 | 0 | 0.036 | 0 | 0.976 | 0.935 | 0.935 | 0.935 | 0.935 | 0.243 | 0.847 | 0.847 | 0.847 | 0.847 | 0     | 0.205 | 0     | 0.205 | 0.205 |
| Thraupidae | <i>Tangara chrysotis</i>            | 0     | 0.046 | 0 | 0     | 0 | 0.986 | 0.984 | 0     | 0.984 | 0     | 0.779 | 0.441 | 0.441 | 0.441 | 0.441 | 0.154 | 0.928 | 0.928 | 0.928 | 0.928 |
| Thraupidae | <i>Tangara cyanicollis</i>          | 0.548 | 0.006 | 0 | 0.006 | 0 | 0.988 | 0.731 | 0.731 | 0.731 | 0.731 | 0.749 | 0.782 | 0.782 | 0.782 | 0.782 | 0.724 | 0.993 | 0.993 | 0.993 | 0.993 |
| Thraupidae | <i>Tangara cyanotis</i>             | 0     | 0.010 | 0 | 0     | 0 | 0     | 0.080 | 0     | 0     | 0     | 0.932 | 0.943 | 0     | 0.943 | 0     | 0.948 | 0.926 | 0.926 | 0.926 | 0.926 |
| Thraupidae | <i>Tangara gyrola</i>               | 0.419 | 0.006 | 0 | 0.006 | 0 | 0.992 | 0.827 | 0.827 | 0.827 | 0.827 | 0.898 | 0.991 | 0.991 | 0.991 | 0.991 | 0     | 0.995 | 0     | 0     | 0     |
| Thraupidae | <i>Tangara mexicana</i>             | 0.389 | 0.154 | 0 | 0.154 | 0 | 0.243 | 0.971 | 0.971 | 0.971 | 0.971 | 0     | 0.071 | 0     | 0     | 0     | 0     | 0.027 | 0     | 0     | 0     |
| Thraupidae | <i>Tangara nigrocincta</i>          | 0.978 | 0.066 | 0 | 0.066 | 0 | 0.564 | 0.950 | 0.950 | 0.950 | 0.950 | 0     | 0.892 | 0     | 0     | 0     | 0     | 0.672 | 0     | 0     | 0     |
| Thraupidae | <i>Tangara nigroviridis</i>         | 0     | 0.004 | 0 | 0     | 0 | 0     | 0.717 | 0     | 0     | 0     | 0.962 | 0.745 | 0     | 0.745 | 0     | 0.992 | 0.165 | 0.165 | 0.165 | 0.165 |
| Thraupidae | <i>Tangara parzudakii</i>           | 0     | 0.003 | 0 | 0     | 0 | 0     | 0.556 | 0     | 0     | 0     | 0.995 | 0.625 | 0     | 0.625 | 0     | 0.991 | 0.732 | 0.732 | 0.732 | 0.732 |
| Thraupidae | <i>Tangara punctata</i>             | 0     | 0.043 | 0 | 0     | 0 | 0.989 | 0.955 | 0.955 | 0.955 | 0.955 | 0.427 | 0.952 | 0.952 | 0.952 | 0.952 | 0.277 | 0.761 | 0.761 | 0.761 | 0.761 |
| Thraupidae | <i>Tangara ruficervix</i>           | 0     | 0.005 | 0 | 0     | 0 | 0.978 | 0.084 | 0     | 0.084 | 0     | 0.987 | 0.636 | 0.636 | 0.636 | 0.636 | 0.991 | 0.136 | 0.136 | 0.136 | 0.136 |
| Thraupidae | <i>Tangara schrankii</i>            | 0.203 | 0.025 | 0 | 0.025 | 0 | 0.231 | 0.742 | 0.742 | 0.742 | 0.742 | 0     | 0.980 | 0     | 0     | 0     | 0     | 0.064 | 0     | 0     | 0     |
| Thraupidae | <i>Tangara vassorii</i>             | 0     | 0.009 | 0 | 0     | 0 | 0     | 0.167 | 0     | 0     | 0     | 0     | 0.337 | 0     | 0     | 0     | 0.545 | 0.119 | 0     | 0.119 | 0     |
| Thraupidae | <i>Tangara velia</i>                | 0.926 | 0.487 | 0 | 0.487 | 0 | 0     | 0.365 | 0     | 0     | 0     | 0     | 0.008 | 0     | 0     | 0     | 0     | 0.038 | 0     | 0     | 0     |
| Thraupidae | <i>Tangara viridicollis</i>         | 0     | 0.014 | 0 | 0     | 0 | 0.066 | 0.002 | 0     | 0.002 | 0     | 0.023 | 0.196 | 0.196 | 0.196 | 0.196 | 0.133 | 0.077 | 0.077 | 0.077 | 0.077 |
| Thraupidae | <i>Tangara xanthocephala</i>        | 0     | 0.002 | 0 | 0     | 0 | 0.871 | 0.797 | 0     | 0.797 | 0     | 0.459 | 0.958 | 0.958 | 0.958 | 0.958 | 0.974 | 0.167 | 0.167 | 0.167 | 0.167 |
| Thraupidae | <i>Tangara xanthogastra</i>         | 0.583 | 0.055 | 0 | 0.055 | 0 | 0.926 | 0.979 | 0.979 | 0.979 | 0.979 | 0     | 0.989 | 0     | 0.989 | 0.989 | 0     | 0.287 | 0     | 0     | 0     |
| Thraupidae | <i>Tersina viridis</i>              | 0.590 | 0.065 | 0 | 0.065 | 0 | 0.994 | 0.427 | 0.427 | 0.427 | 0.427 | 0     | 0.679 | 0     | 0.679 | 0.679 | 0     | 0.971 | 0     | 0     | 0     |
| Thraupidae | <i>Thlypsopsis sordida</i>          | 0.741 | 0.123 | 0 | 0.123 | 0 | 0     | 0.914 | 0     | 0     | 0     | 0     | 0.184 | 0     | 0     | 0     | 0     | 0.126 | 0     | 0     | 0     |
| Thraupidae | <i>Thraupis bonariensis</i>         | 0     | 0.002 | 0 | 0     | 0 | 0.002 | 0.002 | 0     | 0.002 | 0     | 0.006 | 0.089 | 0.089 | 0.089 | 0.089 | 0.183 | 0.020 | 0.020 | 0.020 | 0.020 |
| Thraupidae | <i>Thraupis cyanocephala</i>        | 0     | 0.002 | 0 | 0     | 0 | 0     | 0.304 | 0     | 0     | 0     | 0.794 | 0.263 | 0     | 0.263 | 0     | 0.938 | 0.743 | 0.743 | 0.743 | 0.743 |
| Thraupidae | <i>Thraupis episcopus</i>           | 0.109 | 0.267 | 0 | 0.267 | 0 | 0.267 | 0.549 | 0.549 | 0.549 | 0.549 | 0.458 | 0.299 | 0.299 | 0.299 | 0.299 | 0     | 0.430 | 0     | 0     | 0     |

|            |                                  |       |       |   |       |   |       |       |       |       |       |       |       |       |       |       |       |       |       |       |       |
|------------|----------------------------------|-------|-------|---|-------|---|-------|-------|-------|-------|-------|-------|-------|-------|-------|-------|-------|-------|-------|-------|-------|
| Thraupidae | <i>Thraupis palmarum</i>         | 0.092 | 0.296 | 0 | 0.296 | 0 | 0.307 | 0.705 | 0.705 | 0.705 | 0.705 | 0.321 | 0.348 | 0.348 | 0.348 | 0.348 | 0     | 0.448 | 0     | 0     | 0     |
| Thraupidae | <i>Trichothraupis melanops</i>   | 0     | 0.003 | 0 | 0     | 0 | 0.010 | 0.003 | 0     | 0.003 | 0     | 0.010 | 0.726 | 0.726 | 0.726 | 0.726 | 0     | 0.003 | 0     | 0.003 | 0.003 |
| Tinamidae  | <i>Crypturellus atrocapillus</i> | 0.449 | 0.012 | 0 | 0.012 | 0 | 0.963 | 0.992 | 0.992 | 0.992 | 0.992 | 0     | 0.986 | 0     | 0     | 0     | 0     | 0.454 | 0     | 0     | 0     |
| Tinamidae  | <i>Crypturellus bartletti</i>    | 0.007 | 0.037 | 0 | 0.037 | 0 | 0     | 0.020 | 0     | 0     | 0     | 0     | 0.009 | 0     | 0     | 0     | 0     | 0.005 | 0     | 0     | 0     |
| Tinamidae  | <i>Crypturellus cinereus</i>     | 0.006 | 0.004 | 0 | 0.004 | 0 | 0.001 | 0.132 | 0.132 | 0.132 | 0.132 | 0     | 0.002 | 0     | 0     | 0     | 0     | 0.001 | 0     | 0     | 0     |
| Tinamidae  | <i>Crypturellus obsoletus</i>    | 0.021 | 0.002 | 0 | 0.002 | 0 | 0.861 | 0.483 | 0.483 | 0.483 | 0.483 | 0.006 | 0.946 | 0.946 | 0.946 | 0.946 | 0.010 | 0.689 | 0.689 | 0.689 | 0.689 |
| Tinamidae  | <i>Crypturellus soui</i>         | 0.273 | 0.451 | 0 | 0.451 | 0 | 0.893 | 0.992 | 0.992 | 0.992 | 0.992 | 0.518 | 0.779 | 0.779 | 0.779 | 0.779 | 0     | 0.925 | 0     | 0     | 0     |
| Tinamidae  | <i>Crypturellus strigulosus</i>  | 0.081 | 0.013 | 0 | 0.013 | 0 | 0     | 0.003 | 0     | 0.003 | 0.003 | 0     | 0.001 | 0     | 0     | 0     | 0     | 0.000 | 0     | 0     | 0     |
| Tinamidae  | <i>Crypturellus undulatus</i>    | 0.015 | 0.004 | 0 | 0.004 | 0 | 0     | 0.193 | 0     | 0.193 | 0.193 | 0     | 0.004 | 0     | 0     | 0     | 0     | 0.004 | 0     | 0     | 0     |
| Tinamidae  | <i>Crypturellus variegatus</i>   | 0.017 | 0.008 | 0 | 0.008 | 0 | 0     | 0.455 | 0     | 0     | 0     | 0     | 0.003 | 0     | 0     | 0     | 0     | 0.004 | 0     | 0     | 0     |
| Tinamidae  | <i>Nothocercus nigrocapillus</i> | 0     | 0.003 | 0 | 0     | 0 | 0     | 0.003 | 0     | 0     | 0     | 0     | 0.003 | 0     | 0     | 0     | 0.706 | 0.006 | 0.006 | 0.006 | 0.006 |
| Tinamidae  | <i>Tinamus guttatus</i>          | 0.092 | 0.379 | 0 | 0.379 | 0 | 0.002 | 0.865 | 0.865 | 0.865 | 0.865 | 0     | 0.030 | 0     | 0     | 0     | 0     | 0.006 | 0     | 0     | 0     |
| Tinamidae  | <i>Tinamus major</i>             | 0.668 | 0.223 | 0 | 0.223 | 0 | 0     | 0.079 | 0     | 0.079 | 0.079 | 0     | 0.516 | 0     | 0     | 0     | 0     | 0.035 | 0     | 0     | 0     |
| Tinamidae  | <i>Tinamus tao</i>               | 0.905 | 0.014 | 0 | 0.014 | 0 | 0.875 | 0.967 | 0.967 | 0.967 | 0.967 | 0     | 0.974 | 0     | 0.974 | 0.974 | 0     | 0.834 | 0     | 0     | 0     |
| Trogonidae | <i>Pharomachrus antisianus</i>   | 0     | 0.053 | 0 | 0     | 0 | 0.993 | 0.517 | 0     | 0.517 | 0     | 0.803 | 0.988 | 0.988 | 0.988 | 0.988 | 0.936 | 0.969 | 0.969 | 0.969 | 0.969 |
| Trogonidae | <i>Pharomachrus auriceps</i>     | 0     | 0.002 | 0 | 0     | 0 | 0     | 0.160 | 0     | 0     | 0     | 0.931 | 0.963 | 0     | 0.963 | 0     | 0.989 | 0.941 | 0.941 | 0.941 | 0.941 |
| Trogonidae | <i>Pharomachrus pavoninus</i>    | 0.918 | 0.837 | 0 | 0.837 | 0 | 0.132 | 0.837 | 0.837 | 0.837 | 0.837 | 0     | 0.130 | 0     | 0.130 | 0.130 | 0     | 0.010 | 0     | 0     | 0     |
| Trogonidae | <i>Trogon collaris</i>           | 0.004 | 0.023 | 0 | 0.023 | 0 | 0.965 | 0.681 | 0.681 | 0.681 | 0.681 | 0     | 0.600 | 0     | 0.600 | 0.600 | 0     | 0.874 | 0     | 0     | 0     |
| Trogonidae | <i>Trogon curucui</i>            | 0.058 | 0.024 | 0 | 0.024 | 0 | 0.181 | 0.593 | 0.593 | 0.593 | 0.593 | 0.004 | 0.198 | 0.198 | 0.198 | 0.198 | 0     | 0.044 | 0     | 0     | 0     |
| Trogonidae | <i>Trogon melanurus</i>          | 0.007 | 0.157 | 0 | 0.157 | 0 | 0.004 | 0.820 | 0.820 | 0.820 | 0.820 | 0     | 0.004 | 0     | 0     | 0     | 0     | 0.004 | 0     | 0     | 0     |
| Trogonidae | <i>Trogon personatus</i>         | 0     | 0.011 | 0 | 0     | 0 | 0     | 0.936 | 0     | 0     | 0     | 0.712 | 0.737 | 0.737 | 0.737 | 0.737 | 0.908 | 0.975 | 0.975 | 0.975 | 0.975 |
| Trogonidae | <i>Trogon violaceus</i>          | 0.694 | 0.870 | 0 | 0.870 | 0 | 0     | 0.596 | 0     | 0.596 | 0.596 | 0     | 0.297 | 0     | 0     | 0     | 0     | 0.054 | 0     | 0     | 0     |
| Trogonidae | <i>Trogon viridis</i>            | 0.243 | 0.024 | 0 | 0.024 | 0 | 0     | 0.165 | 0     | 0.165 | 0.165 | 0     | 0.117 | 0     | 0     | 0     | 0     | 0.028 | 0     | 0     | 0     |
| Turdidae   | <i>Catharus fuscater</i>         | 0     | 0.008 | 0 | 0     | 0 | 0     | 0.007 | 0     | 0     | 0     | 0.978 | 0.135 | 0     | 0.135 | 0     | 0.549 | 0.531 | 0.531 | 0.531 | 0.531 |
| Turdidae   | <i>Entomodestes leucotis</i>     | 0     | 0.012 | 0 | 0     | 0 | 0     | 0.215 | 0     | 0     | 0     | 0.473 | 0.473 | 0     | 0.473 | 0     | 0.444 | 0.478 | 0.478 | 0.478 | 0.478 |
| Turdidae   | <i>Myadestes ralloides</i>       | 0     | 0.002 | 0 | 0     | 0 | 0.990 | 0.272 | 0     | 0.272 | 0     | 0.940 | 0.978 | 0.978 | 0.978 | 0.978 | 0.961 | 0.771 | 0.771 | 0.771 | 0.771 |
| Turdidae   | <i>Turdus albicollis</i>         | 0.068 | 0.024 | 0 | 0.024 | 0 | 0     | 0.552 | 0     | 0.552 | 0.552 | 0     | 0.858 | 0     | 0     | 0     | 0     | 0.258 | 0     | 0     | 0     |
| Turdidae   | <i>Turdus chiguanco</i>          | 0     | 0.001 | 0 | 0     | 0 | 0     | 0.004 | 0     | 0     | 0     | 0.001 | 0.003 | 0     | 0.003 | 0     | 0.001 | 0.001 | 0.001 | 0.001 | 0.001 |
| Turdidae   | <i>Turdus fuscater</i>           | 0     | 0.004 | 0 | 0     | 0 | 0     | 0.398 | 0     | 0     | 0     | 0     | 0.188 | 0     | 0     | 0     | 0     | 0.074 | 0     | 0     | 0     |
| Turdidae   | <i>Turdus hauxwelli</i>          | 0.037 | 0.041 | 0 | 0.041 | 0 | 0.125 | 0.932 | 0.932 | 0.932 | 0.932 | 0     | 0.091 | 0     | 0.091 | 0.091 | 0     | 0.046 | 0     | 0     | 0     |
| Turdidae   | <i>Turdus ignobilis</i>          | 0.332 | 0.025 | 0 | 0.025 | 0 | 0.985 | 0.654 | 0.654 | 0.654 | 0.654 | 0.052 | 0.943 | 0.943 | 0.943 | 0.943 | 0     | 0.923 | 0     | 0.923 | 0.923 |
| Turdidae   | <i>Turdus leucops</i>            | 0     | 0.031 | 0 | 0     | 0 | 0.919 | 0.450 | 0     | 0.450 | 0     | 0.753 | 0.881 | 0.881 | 0.881 | 0.881 | 0.902 | 0.592 | 0.592 | 0.592 | 0.592 |
| Turdidae   | <i>Turdus nigriceps</i>          | 0.592 | 0.002 | 0 | 0.002 | 0 | 0.873 | 0.711 | 0.711 | 0.711 | 0.711 | 0.116 | 0.678 | 0.678 | 0.678 | 0.678 | 0     | 0.819 | 0     | 0.819 | 0.819 |
| Turdidae   | <i>Turdus serranus</i>           | 0     | 0.005 | 0 | 0     | 0 | 0     | 0.394 | 0     | 0     | 0     | 0.173 | 0.752 | 0     | 0.752 | 0     | 0.986 | 0.687 | 0.687 | 0.687 | 0.687 |
| Tyrannidae | <i>Elaenia albiceps</i>          | 0.042 | 0.003 | 0 | 0.003 | 0 | 0.005 | 0.003 | 0.003 | 0.003 | 0.003 | 0.004 | 0.082 | 0.082 | 0.082 | 0.082 | 0.722 | 0.005 | 0.005 | 0.005 | 0.005 |
| Tyrannidae | <i>Elaenia flavogaster</i>       | 0.010 | 0.096 | 0 | 0.096 | 0 | 0     | 0.975 | 0     | 0.975 | 0.975 | 0     | 0.960 | 0     | 0     | 0     | 0     | 0.917 | 0     | 0     | 0     |
| Tyrannidae | <i>Elaenia gigas</i>             | 0.992 | 0.314 | 0 | 0.314 | 0 | 0.991 | 0.995 | 0.995 | 0.995 | 0.995 | 0.364 | 0.980 | 0.980 | 0.980 | 0.980 | 0     | 0.580 | 0     | 0     | 0     |
| Tyrannidae | <i>Elaenia obscura</i>           | 0     | 0.017 | 0 | 0     | 0 | 0     | 0.023 | 0     | 0     | 0     | 0     | 0.093 | 0     | 0     | 0     | 0.298 | 0.194 | 0     | 0.194 | 0     |
| Tyrannidae | <i>Elaenia pallatangae</i>       | 0     | 0.013 | 0 | 0     | 0 | 0     | 0.979 | 0     | 0     | 0     | 0.951 | 0.421 | 0.421 | 0.421 | 0.421 | 0.994 | 0.248 | 0.248 | 0.248 | 0.248 |
| Tyrannidae | <i>Lophotriccus pileatus</i>     | 0     | 0.006 | 0 | 0     | 0 | 0.948 | 0.956 | 0     | 0.956 | 0     | 0.988 | 0.989 | 0.989 | 0.989 | 0.989 | 0     | 0.986 | 0     | 0.986 | 0.986 |
| Tyrannidae | <i>Mionectes macconnelli</i>     | 0.003 | 0.013 | 0 | 0.013 | 0 | 0.499 | 0.984 | 0.984 | 0.984 | 0.984 | 0     | 0.478 | 0     | 0.478 | 0.478 | 0     | 0.251 | 0     | 0     | 0     |
| Tyrannidae | <i>Mionectes oleagineus</i>      | 0.335 | 0.192 | 0 | 0.192 | 0 | 0.958 | 0.995 | 0.995 | 0.995 | 0.995 | 0     | 0.989 | 0     | 0.989 | 0.989 | 0     | 0.567 | 0     | 0     | 0     |
| Tyrannidae | <i>Mionectes olivaceus</i>       | 0.547 | 0.043 | 0 | 0.043 | 0 | 0.996 | 0.507 | 0.507 | 0.507 | 0.507 | 0.743 | 0.997 | 0.997 | 0.997 | 0.997 | 0     | 0.816 | 0     | 0.816 | 0.816 |
| Tyrannidae | <i>Mionectes striaticollis</i>   | 0     | 0.004 | 0 | 0     | 0 | 0.325 | 0.724 | 0.724 | 0.724 | 0.724 | 0.263 | 0.847 | 0.847 | 0.847 | 0.847 | 0.994 | 0.562 | 0.562 | 0.562 | 0.562 |
| Tyrannidae | <i>Zimmerius bolivianus</i>      | 0     | 0.003 | 0 | 0     | 0 | 0.956 | 0.209 | 0     | 0.209 | 0     | 0.737 | 0.926 | 0.926 | 0.926 | 0.926 | 0.385 | 0.912 | 0.912 | 0.912 | 0.912 |
| Tyrannidae | <i>Zimmerius gracilipes</i>      | 0.036 | 0.030 | 0 | 0.030 | 0 | 0     | 0.448 | 0     | 0.448 | 0.448 | 0     | 0.042 | 0     | 0     | 0     | 0     | 0.339 | 0     | 0     | 0     |



**Table S3. Continued.**

|              |                                    | 2500 m  |                 |             |           |       | 3000 m  |                 |             |           |       | 3500 m  |                 |             |           |       |
|--------------|------------------------------------|---------|-----------------|-------------|-----------|-------|---------|-----------------|-------------|-----------|-------|---------|-----------------|-------------|-----------|-------|
| Family       | Bird species                       | current | no range change | contraction | expansion | shift | current | no range change | contraction | expansion | shift | current | no range change | contraction | expansion | shift |
| Cardinalidae | <i>Cyanocompsa cyanoides</i>       | 0       | 0.093           | 0           | 0         | 0     | 0       | 0.049           | 0           | 0         | 0     | 0       | 0.004           | 0           | 0         | 0     |
| Cardinalidae | <i>Pheucticus aureoventris</i>     | 0.007   | 0.013           | 0.013       | 0.013     | 0.013 | 0.043   | 0.007           | 0.007       | 0.007     | 0.007 | 0       | 0.003           | 0           | 0.003     | 0.003 |
| Cardinalidae | <i>Pheucticus chrysogaster</i>     | 0.004   | 0.052           | 0.052       | 0.052     | 0.052 | 0.004   | 0.064           | 0.064       | 0.064     | 0.064 | 0.010   | 0.004           | 0.004       | 0.004     | 0.004 |
| Cardinalidae | <i>Saltator aurantiirostris</i>    | 0       | 0.002           | 0           | 0         | 0     | 0.002   | 0.002           | 0.002       | 0.002     | 0.002 | 0.003   | 0.004           | 0.004       | 0.004     | 0.004 |
| Cardinalidae | <i>Saltator coerulescens</i>       | 0       | 0.586           | 0           | 0         | 0     | 0       | 0.004           | 0           | 0         | 0     | 0       | 0.004           | 0           | 0         | 0     |
| Cardinalidae | <i>Saltator grossus</i>            | 0       | 0.030           | 0           | 0         | 0     | 0       | 0.003           | 0           | 0         | 0     | 0       | 0.003           | 0           | 0         | 0     |
| Cardinalidae | <i>Saltator maximus</i>            | 0.007   | 0.168           | 0.168       | 0.168     | 0.168 | 0       | 0.006           | 0           | 0         | 0     | 0       | 0.005           | 0           | 0         | 0     |
| Columbidae   | <i>Geotrygon montana</i>           | 0       | 0.041           | 0           | 0         | 0     | 0       | 0.125           | 0           | 0         | 0     | 0       | 0.001           | 0           | 0         | 0     |
| Columbidae   | <i>Patagioenas cayennensis</i>     | 0       | 0.008           | 0           | 0         | 0     | 0       | 0.085           | 0           | 0         | 0     | 0       | 0.005           | 0           | 0         | 0     |
| Columbidae   | <i>Patagioenas fasciata</i>        | 0.969   | 0.796           | 0.796       | 0.796     | 0.796 | 0.090   | 0.296           | 0.296       | 0.296     | 0.296 | 0.005   | 0.170           | 0.170       | 0.170     | 0.170 |
| Columbidae   | <i>Patagioenas plumbea</i>         | 0       | 0.102           | 0           | 0         | 0     | 0       | 0.225           | 0           | 0         | 0     | 0       | 0.003           | 0           | 0         | 0     |
| Columbidae   | <i>Patagioenas subvinacea</i>      | 0       | 0.868           | 0           | 0         | 0     | 0       | 0.023           | 0           | 0         | 0     | 0       | 0.008           | 0           | 0         | 0     |
| Corvidae     | <i>Cyanocorax cyanomelas</i>       | 0       | 0.003           | 0           | 0         | 0     | 0       | 0.003           | 0           | 0         | 0     | 0       | 0.003           | 0           | 0         | 0     |
| Corvidae     | <i>Cyanocorax violaceus</i>        | 0       | 0.039           | 0           | 0         | 0     | 0       | 0.003           | 0           | 0         | 0     | 0       | 0.003           | 0           | 0         | 0     |
| Corvidae     | <i>Cyanocorax yncas</i>            | 0       | 0.994           | 0           | 0.994     | 0.994 | 0       | 0.547           | 0           | 0         | 0     | 0       | 0.044           | 0           | 0         | 0     |
| Cotingidae   | <i>Ampelioides tschudii</i>        | 0       | 0.255           | 0           | 0         | 0     | 0       | 0.048           | 0           | 0         | 0     | 0       | 0.010           | 0           | 0         | 0     |
| Cotingidae   | <i>Ampelion rubrocristatus</i>     | 0.903   | 0.939           | 0           | 0.939     | 0     | 0.015   | 0.291           | 0.291       | 0.291     | 0.291 | 0       | 0.068           | 0           | 0.068     | 0.068 |
| Cotingidae   | <i>Ampelion rufaxilla</i>          | 0.856   | 0.884           | 0.884       | 0.884     | 0.884 | 0       | 0.940           | 0           | 0.940     | 0.940 | 0       | 0.071           | 0           | 0         | 0     |
| Cotingidae   | <i>Cephalopterus ornatus</i>       | 0       | 0.084           | 0           | 0         | 0     | 0       | 0.004           | 0           | 0         | 0     | 0       | 0.004           | 0           | 0         | 0     |
| Cotingidae   | <i>Conioptilon mcilhennyi</i>      | 0       | 0.078           | 0           | 0         | 0     | 0       | 0.062           | 0           | 0         | 0     | 0       | 0.089           | 0           | 0         | 0     |
| Cotingidae   | <i>Cotinga cayana</i>              | 0       | 0.033           | 0           | 0         | 0     | 0       | 0.005           | 0           | 0         | 0     | 0       | 0.007           | 0           | 0         | 0     |
| Cotingidae   | <i>Cotinga maynana</i>             | 0       | 0.000           | 0           | 0         | 0     | 0       | 0.000           | 0           | 0         | 0     | 0       | 0.000           | 0           | 0         | 0     |
| Cotingidae   | <i>Gymnoderus foetidus</i>         | 0       | 0.002           | 0           | 0         | 0     | 0       | 0.010           | 0           | 0         | 0     | 0       | 0.002           | 0           | 0         | 0     |
| Cotingidae   | <i>Iodopleura isabellae</i>        | 0       | 0.002           | 0           | 0         | 0     | 0       | 0.002           | 0           | 0         | 0     | 0       | 0.001           | 0           | 0         | 0     |
| Cotingidae   | <i>Laniocera hypopyrra</i>         | 0       | 0.015           | 0           | 0         | 0     | 0       | 0.015           | 0           | 0         | 0     | 0       | 0.015           | 0           | 0         | 0     |
| Cotingidae   | <i>Lipaugus vociferans</i>         | 0       | 0.002           | 0           | 0         | 0     | 0       | 0.002           | 0           | 0         | 0     | 0       | 0.006           | 0           | 0         | 0     |
| Cotingidae   | <i>Oxyruncus cristatus</i>         | 0       | 0.538           | 0           | 0         | 0     | 0       | 0.520           | 0           | 0         | 0     | 0       | 0.019           | 0           | 0         | 0     |
| Cotingidae   | <i>Pipreola arcuata</i>            | 0.612   | 0.915           | 0.915       | 0.915     | 0.915 | 0.356   | 0.932           | 0.932       | 0.932     | 0.932 | 0.189   | 0.992           | 0.992       | 0.992     | 0.992 |
| Cotingidae   | <i>Pipreola frontalis</i>          | 0       | 0.508           | 0           | 0         | 0     | 0       | 0.072           | 0           | 0         | 0     | 0       | 0.023           | 0           | 0         | 0     |
| Cotingidae   | <i>Pipreola intermedia</i>         | 0.095   | 0.037           | 0.037       | 0.037     | 0.037 | 0.302   | 0.969           | 0.969       | 0.969     | 0.969 | 0       | 0.055           | 0           | 0         | 0     |
| Cotingidae   | <i>Porphyrolaema porphyrolaema</i> | 0       | 0.001           | 0           | 0         | 0     | 0       | 0.000           | 0           | 0         | 0     | 0       | 0.000           | 0           | 0         | 0     |
| Cotingidae   | <i>Querula purpurata</i>           | 0       | 0.001           | 0           | 0         | 0     | 0       | 0.003           | 0           | 0         | 0     | 0       | 0.001           | 0           | 0         | 0     |
| Cotingidae   | <i>Rupicola peruvianus</i>         | 0.733   | 0.946           | 0.946       | 0.946     | 0.946 | 0       | 0.006           | 0           | 0.006     | 0.006 | 0       | 0.213           | 0           | 0         | 0     |
| Cotingidae   | <i>Snowornis subalaris</i>         | 0       | 0.010           | 0           | 0         | 0     | 0       | 0.010           | 0           | 0         | 0     | 0       | 0.010           | 0           | 0         | 0     |
| Cotingidae   | <i>Tityra cayana</i>               | 0       | 0.006           | 0           | 0         | 0     | 0       | 0.008           | 0           | 0         | 0     | 0       | 0.002           | 0           | 0         | 0     |
| Cotingidae   | <i>Tityra inquisitor</i>           | 0       | 0.014           | 0           | 0         | 0     | 0       | 0.013           | 0           | 0         | 0     | 0       | 0.003           | 0           | 0         | 0     |
| Cotingidae   | <i>Tityra semifasciata</i>         | 0       | 0.806           | 0           | 0         | 0     | 0       | 0.006           | 0           | 0         | 0     | 0       | 0.007           | 0           | 0         | 0     |
| Cracidae     | <i>Aburria aburri</i>              | 0       | 0.733           | 0           | 0         | 0     | 0       | 0.084           | 0           | 0         | 0     | 0       | 0.009           | 0           | 0         | 0     |
| Cracidae     | <i>Mitu tuberosum</i>              | 0       | 0.001           | 0           | 0         | 0     | 0       | 0.001           | 0           | 0         | 0     | 0       | 0.001           | 0           | 0         | 0     |
| Cracidae     | <i>Ortalis guttata</i>             | 0       | 0.232           | 0           | 0         | 0     | 0       | 0.089           | 0           | 0         | 0     | 0       | 0.005           | 0           | 0         | 0     |
| Cracidae     | <i>Penelope jacquacu</i>           | 0       | 0.003           | 0           | 0         | 0     | 0       | 0.003           | 0           | 0         | 0     | 0       | 0.003           | 0           | 0         | 0     |

|                |                                    |       |       |       |       |       |       |       |       |       |       |       |       |       |       |       |
|----------------|------------------------------------|-------|-------|-------|-------|-------|-------|-------|-------|-------|-------|-------|-------|-------|-------|-------|
| Cracidae       | <i>Penelope montagnii</i>          | 0.624 | 0.877 | 0.877 | 0.877 | 0.877 | 0.151 | 0.705 | 0.705 | 0.705 | 0.705 | 0     | 0.033 | 0     | 0.033 | 0.033 |
| Cracidae       | <i>Pipile cumanensis</i>           | 0     | 0.005 | 0     | 0     | 0     | 0     | 0.005 | 0     | 0     | 0     | 0     | 0.007 | 0     | 0     | 0     |
| Icteridae      | <i>Cacicus cela</i>                | 0     | 0.299 | 0     | 0     | 0     | 0     | 0.005 | 0     | 0     | 0     | 0     | 0.005 | 0     | 0     | 0     |
| Icteridae      | <i>Cacicus chrysonotus</i>         | 0.874 | 0.957 | 0.957 | 0.957 | 0.957 | 0.295 | 0.058 | 0.058 | 0.058 | 0.058 | 0     | 0.163 | 0     | 0.163 | 0.163 |
| Icteridae      | <i>Cacicus haemorrhous</i>         | 0     | 0.014 | 0     | 0     | 0     | 0     | 0.013 | 0     | 0     | 0     | 0     | 0.003 | 0     | 0     | 0     |
| Icteridae      | <i>Clypicterus oseryi</i>          | 0     | 0.018 | 0     | 0     | 0     | 0     | 0.002 | 0     | 0     | 0     | 0     | 0.006 | 0     | 0     | 0     |
| Icteridae      | <i>Icterus icterus</i>             | 0     | 0.030 | 0     | 0     | 0     | 0     | 0.025 | 0     | 0     | 0     | 0     | 0.024 | 0     | 0     | 0     |
| Icteridae      | <i>Molothrus oryzivorus</i>        | 0     | 0.246 | 0     | 0     | 0     | 0     | 0.016 | 0     | 0     | 0     | 0     | 0.045 | 0     | 0     | 0     |
| Icteridae      | <i>Psarocolius angustifrons</i>    | 0     | 0.868 | 0     | 0     | 0     | 0     | 0.008 | 0     | 0     | 0     | 0     | 0.005 | 0     | 0     | 0     |
| Icteridae      | <i>Psarocolius atrovirens</i>      | 0.009 | 0.208 | 0.208 | 0.208 | 0.208 | 0     | 0.015 | 0     | 0.015 | 0.015 | 0     | 0.001 | 0     | 0     | 0     |
| Icteridae      | <i>Psarocolius bifasciatus</i>     | 0     | 0.002 | 0     | 0     | 0     | 0     | 0.002 | 0     | 0     | 0     | 0     | 0.002 | 0     | 0     | 0     |
| Icteridae      | <i>Psarocolius decumanus</i>       | 0     | 0.574 | 0     | 0     | 0     | 0     | 0.026 | 0     | 0     | 0     | 0     | 0.004 | 0     | 0     | 0     |
| Odontophoridae | <i>Odontophorus balliviani</i>     | 0.475 | 0.631 | 0.631 | 0.631 | 0.631 | 0.411 | 0.568 | 0.568 | 0.568 | 0.568 | 0     | 0.004 | 0     | 0     | 0     |
| Odontophoridae | <i>Odontophorus speciosus</i>      | 0     | 0.359 | 0     | 0     | 0     | 0     | 0.136 | 0     | 0     | 0     | 0     | 0.009 | 0     | 0     | 0     |
| Odontophoridae | <i>Odontophorus stellatus</i>      | 0     | 0.039 | 0     | 0     | 0     | 0     | 0.001 | 0     | 0     | 0     | 0     | 0.001 | 0     | 0     | 0     |
| Picidae        | <i>Celeus elegans</i>              | 0     | 0.001 | 0     | 0     | 0     | 0     | 0.001 | 0     | 0     | 0     | 0     | 0.001 | 0     | 0     | 0     |
| Picidae        | <i>Celeus flavus</i>               | 0     | 0.008 | 0     | 0     | 0     | 0     | 0.008 | 0     | 0     | 0     | 0     | 0.008 | 0     | 0     | 0     |
| Picidae        | <i>Celeus grammicus</i>            | 0     | 0.007 | 0     | 0     | 0     | 0     | 0.006 | 0     | 0     | 0     | 0     | 0.016 | 0     | 0     | 0     |
| Picidae        | <i>Celeus spectabilis</i>          | 0     | 0.206 | 0     | 0     | 0     | 0     | 0.000 | 0     | 0     | 0     | 0     | 0.001 | 0     | 0     | 0     |
| Picidae        | <i>Celeus torquatus</i>            | 0     | 0.012 | 0     | 0     | 0     | 0     | 0.009 | 0     | 0     | 0     | 0     | 0.011 | 0     | 0     | 0     |
| Picidae        | <i>Colaptes rubiginosus</i>        | 0     | 0.954 | 0     | 0     | 0     | 0     | 0.027 | 0     | 0     | 0     | 0     | 0.005 | 0     | 0     | 0     |
| Pipridae       | <i>Chiroxiphia boliviana</i>       | 0     | 0.012 | 0     | 0     | 0     | 0     | 0.008 | 0     | 0     | 0     | 0     | 0.006 | 0     | 0     | 0     |
| Pipridae       | <i>Chiroxiphia pareola</i>         | 0     | 0.029 | 0     | 0     | 0     | 0     | 0.032 | 0     | 0     | 0     | 0     | 0.027 | 0     | 0     | 0     |
| Pipridae       | <i>Lepidothrix coeruleocapilla</i> | 0     | 0.004 | 0     | 0     | 0     | 0     | 0.004 | 0     | 0     | 0     | 0     | 0.003 | 0     | 0     | 0     |
| Pipridae       | <i>Lepidothrix coronata</i>        | 0     | 0.013 | 0     | 0     | 0     | 0     | 0.011 | 0     | 0     | 0     | 0     | 0.013 | 0     | 0     | 0     |
| Pipridae       | <i>Machaeropterus pyrocephalus</i> | 0     | 0.004 | 0     | 0     | 0     | 0     | 0.004 | 0     | 0     | 0     | 0     | 0.004 | 0     | 0     | 0     |
| Pipridae       | <i>Manacus manacus</i>             | 0     | 0.963 | 0     | 0     | 0     | 0     | 0.002 | 0     | 0     | 0     | 0     | 0.002 | 0     | 0     | 0     |
| Pipridae       | <i>Neopelma sulphureiventer</i>    | 0     | 0.031 | 0     | 0     | 0     | 0     | 0.042 | 0     | 0     | 0     | 0     | 0.056 | 0     | 0     | 0     |
| Pipridae       | <i>Pipra chloromeros</i>           | 0     | 0.006 | 0     | 0     | 0     | 0     | 0.006 | 0     | 0     | 0     | 0     | 0.006 | 0     | 0     | 0     |
| Pipridae       | <i>Pipra fasciicauda</i>           | 0     | 0.003 | 0     | 0     | 0     | 0     | 0.003 | 0     | 0     | 0     | 0     | 0.003 | 0     | 0     | 0     |
| Pipridae       | <i>Xenopipo holochlora</i>         | 0     | 0.015 | 0     | 0     | 0     | 0     | 0.021 | 0     | 0     | 0     | 0     | 0.001 | 0     | 0     | 0     |
| Pipridae       | <i>Xenopipo unicolor</i>           | 0     | 0.317 | 0     | 0     | 0     | 0     | 0.012 | 0     | 0     | 0     | 0     | 0.003 | 0     | 0     | 0     |
| Psittacidae    | <i>Amazona farinosa</i>            | 0     | 0.011 | 0     | 0     | 0     | 0     | 0.010 | 0     | 0     | 0     | 0     | 0.004 | 0     | 0     | 0     |
| Psittacidae    | <i>Amazona mercenaria</i>          | 0.981 | 0.981 | 0.981 | 0.981 | 0.981 | 0.948 | 0.759 | 0.759 | 0.759 | 0.759 | 0     | 0.838 | 0     | 0     | 0     |
| Psittacidae    | <i>Amazona ochrocephala</i>        | 0     | 0.004 | 0     | 0     | 0     | 0     | 0.009 | 0     | 0     | 0     | 0     | 0.005 | 0     | 0     | 0     |
| Psittacidae    | <i>Ara ararauna</i>                | 0     | 0.005 | 0     | 0     | 0     | 0     | 0.005 | 0     | 0     | 0     | 0     | 0.005 | 0     | 0     | 0     |
| Psittacidae    | <i>Ara chloropterus</i>            | 0     | 0.003 | 0     | 0     | 0     | 0     | 0.005 | 0     | 0     | 0     | 0     | 0.005 | 0     | 0     | 0     |
| Psittacidae    | <i>Ara macao</i>                   | 0     | 0.003 | 0     | 0     | 0     | 0     | 0.003 | 0     | 0     | 0     | 0     | 0.003 | 0     | 0     | 0     |
| Psittacidae    | <i>Ara militaris</i>               | 0     | 0.213 | 0     | 0     | 0     | 0     | 0.001 | 0     | 0     | 0     | 0     | 0.001 | 0     | 0     | 0     |
| Psittacidae    | <i>Ara severus</i>                 | 0     | 0.044 | 0     | 0     | 0     | 0     | 0.006 | 0     | 0     | 0     | 0     | 0.004 | 0     | 0     | 0     |
| Psittacidae    | <i>Aratinga leucophthalma</i>      | 0     | 0.003 | 0     | 0     | 0     | 0     | 0.130 | 0     | 0     | 0     | 0     | 0.004 | 0     | 0     | 0     |
| Psittacidae    | <i>Aratinga mitrata</i>            | 0.002 | 0.002 | 0.002 | 0.002 | 0.002 | 0.002 | 0.002 | 0.002 | 0.002 | 0.002 | 0     | 0.002 | 0     | 0.002 | 0.002 |
| Psittacidae    | <i>Aratinga weddellii</i>          | 0     | 0.002 | 0     | 0     | 0     | 0     | 0.002 | 0     | 0     | 0     | 0     | 0.002 | 0     | 0     | 0     |
| Psittacidae    | <i>Bolborhynchus lineola</i>       | 0.715 | 0.752 | 0.752 | 0.752 | 0.752 | 0.195 | 0.566 | 0.566 | 0.566 | 0.566 | 0     | 0.157 | 0     | 0.157 | 0.157 |
| Psittacidae    | <i>Bolborhynchus orbygnesius</i>   | 0.049 | 0.107 | 0     | 0.107 | 0     | 0.029 | 0.051 | 0.051 | 0.051 | 0.051 | 0.012 | 0.015 | 0.015 | 0.015 | 0.015 |
| Psittacidae    | <i>Brotogeris cyanoptera</i>       | 0     | 0.007 | 0     | 0     | 0     | 0     | 0.002 | 0     | 0     | 0     | 0     | 0.002 | 0     | 0     | 0     |
| Psittacidae    | <i>Brotogeris sanctithomae</i>     | 0     | 0.028 | 0     | 0     | 0     | 0     | 0.002 | 0     | 0     | 0     | 0     | 0.028 | 0     | 0     | 0     |
| Psittacidae    | <i>Forpus modestus</i>             | 0     | 0.017 | 0     | 0     | 0     | 0     | 0.017 | 0     | 0     | 0     | 0     | 0.017 | 0     | 0     | 0     |
| Psittacidae    | <i>Nannopsittaca dachilleae</i>    | 0     | 0.001 | 0     | 0     | 0     | 0     | 0.000 | 0     | 0     | 0     | 0     | 0.000 | 0     | 0     | 0     |
| Psittacidae    | <i>Orthopsittaca manilata</i>      | 0     | 0.023 | 0     | 0     | 0     | 0     | 0.004 | 0     | 0     | 0     | 0     | 0.007 | 0     | 0     | 0     |

|                 |                                       |       |       |       |       |       |       |       |       |       |       |       |       |       |       |       |
|-----------------|---------------------------------------|-------|-------|-------|-------|-------|-------|-------|-------|-------|-------|-------|-------|-------|-------|-------|
| Psittacidae     | <i>Pionites leucogaster</i>           | 0     | 0.001 | 0     | 0     | 0     | 0     | 0.000 | 0     | 0     | 0     | 0     | 0.000 | 0     | 0     | 0     |
| Psittacidae     | <i>Pionus menstruus</i>               | 0     | 0.092 | 0     | 0.092 | 0.092 | 0     | 0.004 | 0     | 0     | 0     | 0     | 0.004 | 0     | 0     | 0     |
| Psittacidae     | <i>Pionus tumultuosus</i>             | 0.893 | 0.990 | 0.990 | 0.990 | 0.990 | 0.297 | 0.990 | 0.990 | 0.990 | 0.990 | 0     | 0.029 | 0     | 0     | 0     |
| Psittacidae     | <i>Primolius couloni</i>              | 0     | 0.004 | 0     | 0     | 0     | 0     | 0.011 | 0     | 0     | 0     | 0     | 0.006 | 0     | 0     | 0     |
| Psittacidae     | <i>Pyrilia barrabandi</i>             | 0     | 0.006 | 0     | 0     | 0     | 0     | 0.006 | 0     | 0     | 0     | 0     | 0.006 | 0     | 0     | 0     |
| Psittacidae     | <i>Pyrrhura roseifrons</i>            | 0     | 0.005 | 0     | 0     | 0     | 0     | 0.005 | 0     | 0     | 0     | 0     | 0.005 | 0     | 0     | 0     |
| Psittacidae     | <i>Pyrrhura rupicola</i>              | 0     | 0.018 | 0     | 0     | 0     | 0     | 0.018 | 0     | 0     | 0     | 0     | 0.018 | 0     | 0     | 0     |
| Psittacidae     | <i>Touit huetii</i>                   | 0     | 0.001 | 0     | 0     | 0     | 0     | 0.000 | 0     | 0     | 0     | 0     | 0.000 | 0     | 0     | 0     |
| Psophiidae      | <i>Psophia leucoptera</i>             | 0     | 0.022 | 0     | 0     | 0     | 0     | 0.002 | 0     | 0     | 0     | 0     | 0.006 | 0     | 0     | 0     |
| Ramphastidae    | <i>Andigena hypoglauca</i>            | 0.230 | 0.047 | 0.047 | 0.047 | 0.047 | 0.767 | 0.928 | 0.928 | 0.928 | 0.928 | 0.814 | 0.200 | 0.200 | 0.200 | 0.200 |
| Ramphastidae    | <i>Aulacorhynchus coeruleicinctis</i> | 0.043 | 0.671 | 0.671 | 0.671 | 0.671 | 0     | 0.885 | 0     | 0.885 | 0.885 | 0     | 0.012 | 0     | 0     | 0     |
| Ramphastidae    | <i>Aulacorhynchus derbianus</i>       | 0     | 0.425 | 0     | 0     | 0     | 0     | 0.167 | 0     | 0     | 0     | 0     | 0.019 | 0     | 0     | 0     |
| Ramphastidae    | <i>Aulacorhynchus prasinus</i>        | 0     | 0.915 | 0     | 0     | 0     | 0     | 0.522 | 0     | 0     | 0     | 0     | 0.316 | 0     | 0     | 0     |
| Ramphastidae    | <i>Capito auratus</i>                 | 0     | 0.019 | 0     | 0     | 0     | 0     | 0.001 | 0     | 0     | 0     | 0     | 0.002 | 0     | 0     | 0     |
| Ramphastidae    | <i>Eubucco richardsoni</i>            | 0     | 0.002 | 0     | 0     | 0     | 0     | 0.003 | 0     | 0     | 0     | 0     | 0.002 | 0     | 0     | 0     |
| Ramphastidae    | <i>Eubucco tucinkae</i>               | 0     | 0.086 | 0     | 0     | 0     | 0     | 0.004 | 0     | 0     | 0     | 0     | 0.005 | 0     | 0     | 0     |
| Ramphastidae    | <i>Eubucco versicolor</i>             | 0     | 0.007 | 0     | 0.007 | 0.007 | 0     | 0.050 | 0     | 0     | 0     | 0     | 0.002 | 0     | 0     | 0     |
| Ramphastidae    | <i>Pteroglossus azara</i>             | 0     | 0.001 | 0     | 0     | 0     | 0     | 0.001 | 0     | 0     | 0     | 0     | 0.002 | 0     | 0     | 0     |
| Ramphastidae    | <i>Pteroglossus beauharnaesii</i>     | 0     | 0.003 | 0     | 0     | 0     | 0     | 0.003 | 0     | 0     | 0     | 0     | 0.003 | 0     | 0     | 0     |
| Ramphastidae    | <i>Pteroglossus castanotis</i>        | 0     | 0.033 | 0     | 0     | 0     | 0     | 0.004 | 0     | 0     | 0     | 0     | 0.004 | 0     | 0     | 0     |
| Ramphastidae    | <i>Pteroglossus inscriptus</i>        | 0     | 0.014 | 0     | 0     | 0     | 0     | 0.014 | 0     | 0     | 0     | 0     | 0.013 | 0     | 0     | 0     |
| Ramphastidae    | <i>Ramphastos tucanus</i>             | 0     | 0.002 | 0     | 0     | 0     | 0     | 0.002 | 0     | 0     | 0     | 0     | 0.003 | 0     | 0     | 0     |
| Ramphastidae    | <i>Ramphastos vitellinus</i>          | 0     | 0.009 | 0     | 0     | 0     | 0     | 0.003 | 0     | 0     | 0     | 0     | 0.004 | 0     | 0     | 0     |
| Ramphastidae    | <i>Selenidera reinwardtii</i>         | 0     | 0.003 | 0     | 0     | 0     | 0     | 0.000 | 0     | 0     | 0     | 0     | 0.000 | 0     | 0     | 0     |
| Steatornithidae | <i>Steatornis caripensis</i>          | 0     | 0.989 | 0     | 0     | 0     | 0     | 0.798 | 0     | 0     | 0     | 0     | 0.130 | 0     | 0     | 0     |
| Thraupidae      | <i>Anisognathus igniventris</i>       | 0     | 0.222 | 0     | 0     | 0     | 0.551 | 0.940 | 0.940 | 0.940 | 0.940 | 0.878 | 0.767 | 0.767 | 0.767 | 0.767 |
| Thraupidae      | <i>Anisognathus somptuosus</i>        | 0.130 | 0.831 | 0.831 | 0.831 | 0.831 | 0.051 | 0.009 | 0.009 | 0.009 | 0.009 | 0     | 0.258 | 0     | 0     | 0     |
| Thraupidae      | <i>Buthraupis montana</i>             | 0.370 | 0.864 | 0     | 0.864 | 0     | 0.040 | 0.232 | 0.232 | 0.232 | 0.232 | 0     | 0.509 | 0     | 0.509 | 0.509 |
| Thraupidae      | <i>Catamblyrhynchus diadema</i>       | 0.921 | 0.940 | 0.940 | 0.940 | 0.940 | 0.864 | 0.945 | 0.945 | 0.945 | 0.945 | 0     | 0.612 | 0     | 0.612 | 0.612 |
| Thraupidae      | <i>Chlorochrysa calliparaea</i>       | 0     | 0.717 | 0     | 0.717 | 0.717 | 0     | 0.063 | 0     | 0     | 0     | 0     | 0.005 | 0     | 0     | 0     |
| Thraupidae      | <i>Chlorophanes spiza</i>             | 0     | 0.089 | 0     | 0     | 0     | 0     | 0.005 | 0     | 0     | 0     | 0     | 0.006 | 0     | 0     | 0     |
| Thraupidae      | <i>Chlorophonia cyanea</i>            | 0     | 0.823 | 0     | 0     | 0     | 0     | 0.045 | 0     | 0     | 0     | 0     | 0.007 | 0     | 0     | 0     |
| Thraupidae      | <i>Chlorornis riefferii</i>           | 0.813 | 0.884 | 0.884 | 0.884 | 0.884 | 0.561 | 0.991 | 0.991 | 0.991 | 0.991 | 0     | 0.015 | 0     | 0.015 | 0.015 |
| Thraupidae      | <i>Chlorospingus canigularis</i>      | 0     | 0.960 | 0     | 0     | 0     | 0     | 0.773 | 0     | 0     | 0     | 0     | 0.005 | 0     | 0     | 0     |
| Thraupidae      | <i>Chlorospingus flavigularis</i>     | 0     | 0.076 | 0     | 0.076 | 0.076 | 0     | 0.059 | 0     | 0     | 0     | 0     | 0.003 | 0     | 0     | 0     |
| Thraupidae      | <i>Chlorospingus ophthalmicus</i>     | 0.776 | 0.919 | 0.919 | 0.919 | 0.919 | 0     | 0.971 | 0     | 0     | 0     | 0     | 0.127 | 0     | 0     | 0     |
| Thraupidae      | <i>Chlorospingus parvirostris</i>     | 0.414 | 0.934 | 0.934 | 0.934 | 0.934 | 0     | 0.499 | 0     | 0     | 0     | 0     | 0.008 | 0     | 0     | 0     |
| Thraupidae      | <i>Cissopis leverianus</i>            | 0     | 0.225 | 0     | 0     | 0     | 0     | 0.011 | 0     | 0     | 0     | 0     | 0.006 | 0     | 0     | 0     |
| Thraupidae      | <i>Conirostrum cinereum</i>           | 0     | 0.012 | 0     | 0     | 0     | 0.003 | 0.012 | 0     | 0.012 | 0     | 0.014 | 0.003 | 0.003 | 0.003 | 0.003 |
| Thraupidae      | <i>Conirostrum speciosum</i>          | 0     | 0.018 | 0     | 0     | 0     | 0     | 0.024 | 0     | 0     | 0     | 0     | 0.008 | 0     | 0     | 0     |
| Thraupidae      | <i>Cyanerpes caeruleus</i>            | 0     | 0.260 | 0     | 0     | 0     | 0     | 0.002 | 0     | 0     | 0     | 0     | 0.006 | 0     | 0     | 0     |
| Thraupidae      | <i>Cyanerpes cyaneus</i>              | 0     | 0.389 | 0     | 0     | 0     | 0     | 0.000 | 0     | 0     | 0     | 0     | 0.000 | 0     | 0     | 0     |
| Thraupidae      | <i>Dacnis cayana</i>                  | 0     | 0.030 | 0     | 0     | 0     | 0     | 0.015 | 0     | 0     | 0     | 0     | 0.005 | 0     | 0     | 0     |
| Thraupidae      | <i>Dacnis flaviventer</i>             | 0     | 0.190 | 0     | 0     | 0     | 0     | 0.002 | 0     | 0     | 0     | 0     | 0.004 | 0     | 0     | 0     |
| Thraupidae      | <i>Dacnis lineata</i>                 | 0     | 0.487 | 0     | 0     | 0     | 0     | 0.004 | 0     | 0     | 0     | 0     | 0.004 | 0     | 0     | 0     |
| Thraupidae      | <i>Delothraupis castaneiventris</i>   | 0     | 0.001 | 0     | 0.001 | 0     | 0.070 | 0.080 | 0.080 | 0.080 | 0.080 | 0     | 0.007 | 0.007 | 0.007 | 0.007 |
| Thraupidae      | <i>Diglossa brunneiventris</i>        | 0     | 0.002 | 0     | 0     | 0     | 0.003 | 0.006 | 0.006 | 0.006 | 0.006 | 0.007 | 0.063 | 0.063 | 0.063 | 0.063 |
| Thraupidae      | <i>Diglossa caerulescens</i>          | 0.977 | 0.997 | 0.997 | 0.997 | 0.997 | 0     | 0.346 | 0     | 0.346 | 0.346 | 0     | 0.078 | 0     | 0     | 0     |
| Thraupidae      | <i>Diglossa cyanea</i>                | 0.969 | 0.280 | 0.280 | 0.280 | 0.280 | 0.044 | 0.653 | 0.653 | 0.653 | 0.653 | 0.125 | 0.042 | 0.042 | 0.042 | 0.042 |
| Thraupidae      | <i>Diglossa glauca</i>                | 0     | 0.673 | 0     | 0.673 | 0.673 | 0     | 0.073 | 0     | 0     | 0     | 0     | 0.018 | 0     | 0     | 0     |

|            |                                  |       |       |       |       |       |       |       |       |       |       |       |       |       |       |       |
|------------|----------------------------------|-------|-------|-------|-------|-------|-------|-------|-------|-------|-------|-------|-------|-------|-------|-------|
| Thraupidae | <i>Diglossa mystacalis</i>       | 0     | 0.005 | 0     | 0     | 0     | 0.185 | 0.091 | 0.091 | 0.091 | 0.091 | 0.033 | 0.011 | 0.011 | 0.011 | 0.011 |
| Thraupidae | <i>Diglossa sitoides</i>         | 0.216 | 0.711 | 0.711 | 0.711 | 0.711 | 0.062 | 0.682 | 0.682 | 0.682 | 0.682 | 0.004 | 0.005 | 0.005 | 0.005 | 0.005 |
| Thraupidae | <i>Dubusia taeniata</i>          | 0.863 | 0.657 | 0.657 | 0.657 | 0.657 | 0.374 | 0.156 | 0.156 | 0.156 | 0.156 | 0     | 0.971 | 0     | 0.971 | 0.971 |
| Thraupidae | <i>Euphonia chlorotica</i>       | 0     | 0.009 | 0     | 0     | 0     | 0     | 0.011 | 0     | 0     | 0     | 0     | 0.004 | 0     | 0     | 0     |
| Thraupidae | <i>Euphonia chrysopasta</i>      | 0     | 0.042 | 0     | 0     | 0     | 0     | 0.017 | 0     | 0     | 0     | 0     | 0.028 | 0     | 0     | 0     |
| Thraupidae | <i>Euphonia laniirostris</i>     | 0     | 0.511 | 0     | 0     | 0     | 0     | 0.005 | 0     | 0     | 0     | 0     | 0.119 | 0     | 0     | 0     |
| Thraupidae | <i>Euphonia mesochrysa</i>       | 0     | 0.797 | 0     | 0     | 0     | 0     | 0.017 | 0     | 0     | 0     | 0     | 0.005 | 0     | 0     | 0     |
| Thraupidae | <i>Euphonia minuta</i>           | 0     | 0.100 | 0     | 0     | 0     | 0     | 0.020 | 0     | 0     | 0     | 0     | 0.031 | 0     | 0     | 0     |
| Thraupidae | <i>Euphonia rufiventris</i>      | 0     | 0.019 | 0     | 0     | 0     | 0     | 0.026 | 0     | 0     | 0     | 0     | 0.012 | 0     | 0     | 0     |
| Thraupidae | <i>Euphonia xanthogaster</i>     | 0     | 0.219 | 0     | 0.219 | 0.219 | 0     | 0.080 | 0     | 0     | 0     | 0     | 0.011 | 0     | 0     | 0     |
| Thraupidae | <i>Iridophanes pulcherrimus</i>  | 0     | 0.998 | 0     | 0     | 0     | 0     | 0.820 | 0     | 0     | 0     | 0     | 0.001 | 0     | 0     | 0     |
| Thraupidae | <i>Iridosornis analis</i>        | 0     | 0.513 | 0     | 0.513 | 0.513 | 0     | 0.023 | 0     | 0     | 0     | 0     | 0.022 | 0     | 0     | 0     |
| Thraupidae | <i>Iridosornis jelskii</i>       | 0.003 | 0.056 | 0     | 0.056 | 0     | 0.195 | 0.144 | 0.144 | 0.144 | 0.144 | 0.003 | 0.005 | 0.005 | 0.005 | 0.005 |
| Thraupidae | <i>Lamprospiza melanoleuca</i>   | 0     | 0.004 | 0     | 0     | 0     | 0     | 0.004 | 0     | 0     | 0     | 0     | 0.004 | 0     | 0     | 0     |
| Thraupidae | <i>Pipraeidea melanonota</i>     | 0.273 | 0.790 | 0.790 | 0.790 | 0.790 | 0.007 | 0.677 | 0.677 | 0.677 | 0.677 | 0     | 0.036 | 0     | 0     | 0     |
| Thraupidae | <i>Piranga leucoptera</i>        | 0     | 0.455 | 0     | 0     | 0     | 0     | 0.014 | 0     | 0     | 0     | 0     | 0.041 | 0     | 0     | 0     |
| Thraupidae | <i>Ramphocelus carbo</i>         | 0     | 0.027 | 0     | 0     | 0     | 0     | 0.003 | 0     | 0     | 0     | 0     | 0.003 | 0     | 0     | 0     |
| Thraupidae | <i>Ramphocelus nigrogularis</i>  | 0     | 0.005 | 0     | 0     | 0     | 0     | 0.002 | 0     | 0     | 0     | 0     | 0.003 | 0     | 0     | 0     |
| Thraupidae | <i>Schistochlamys melanopis</i>  | 0.010 | 0.011 | 0.011 | 0.011 | 0.011 | 0     | 0.099 | 0     | 0     | 0     | 0     | 0.009 | 0     | 0     | 0     |
| Thraupidae | <i>Tachyphonus cristatus</i>     | 0     | 0.005 | 0     | 0     | 0     | 0     | 0.004 | 0     | 0     | 0     | 0     | 0.003 | 0     | 0     | 0     |
| Thraupidae | <i>Tachyphonus rufiventer</i>    | 0     | 0.003 | 0     | 0     | 0     | 0     | 0.005 | 0     | 0     | 0     | 0     | 0.004 | 0     | 0     | 0     |
| Thraupidae | <i>Tangara arthus</i>            | 0     | 0.127 | 0     | 0     | 0     | 0     | 0.003 | 0     | 0     | 0     | 0     | 0.298 | 0     | 0     | 0     |
| Thraupidae | <i>Tangara callophrys</i>        | 0     | 0.006 | 0     | 0     | 0     | 0     | 0.007 | 0     | 0     | 0     | 0     | 0.006 | 0     | 0     | 0     |
| Thraupidae | <i>Tangara chilensis</i>         | 0     | 0.855 | 0     | 0     | 0     | 0     | 0.003 | 0     | 0     | 0     | 0     | 0.003 | 0     | 0     | 0     |
| Thraupidae | <i>Tangara chrysotis</i>         | 0     | 0.899 | 0     | 0     | 0     | 0     | 0.025 | 0     | 0     | 0     | 0     | 0.006 | 0     | 0     | 0     |
| Thraupidae | <i>Tangara cyanicollis</i>       | 0     | 0.966 | 0     | 0     | 0     | 0     | 0.034 | 0     | 0     | 0     | 0     | 0.009 | 0     | 0     | 0     |
| Thraupidae | <i>Tangara cyanotis</i>          | 0     | 0.379 | 0     | 0     | 0     | 0     | 0.224 | 0     | 0     | 0     | 0     | 0.010 | 0     | 0     | 0     |
| Thraupidae | <i>Tangara gyrola</i>            | 0     | 0.951 | 0     | 0     | 0     | 0     | 0.008 | 0     | 0     | 0     | 0     | 0.063 | 0     | 0     | 0     |
| Thraupidae | <i>Tangara mexicana</i>          | 0     | 0.004 | 0     | 0     | 0     | 0     | 0.003 | 0     | 0     | 0     | 0     | 0.003 | 0     | 0     | 0     |
| Thraupidae | <i>Tangara nigrocincta</i>       | 0     | 0.474 | 0     | 0     | 0     | 0     | 0.095 | 0     | 0     | 0     | 0     | 0.004 | 0     | 0     | 0     |
| Thraupidae | <i>Tangara nigroviridis</i>      | 0.973 | 0.317 | 0.317 | 0.317 | 0.317 | 0     | 0.018 | 0     | 0     | 0     | 0     | 0.030 | 0     | 0     | 0     |
| Thraupidae | <i>Tangara parzudakii</i>        | 0     | 0.254 | 0     | 0     | 0     | 0     | 0.034 | 0     | 0     | 0     | 0     | 0.003 | 0     | 0     | 0     |
| Thraupidae | <i>Tangara punctata</i>          | 0     | 0.246 | 0     | 0     | 0     | 0     | 0.011 | 0     | 0     | 0     | 0     | 0.008 | 0     | 0     | 0     |
| Thraupidae | <i>Tangara ruficervix</i>        | 0     | 0.579 | 0     | 0     | 0     | 0     | 0.451 | 0     | 0     | 0     | 0     | 0.005 | 0     | 0     | 0     |
| Thraupidae | <i>Tangara schrankii</i>         | 0     | 0.002 | 0     | 0     | 0     | 0     | 0.002 | 0     | 0     | 0     | 0     | 0.002 | 0     | 0     | 0     |
| Thraupidae | <i>Tangara vassorii</i>          | 0.550 | 0.940 | 0.940 | 0.940 | 0.940 | 0.972 | 0.021 | 0.021 | 0.021 | 0.021 | 0     | 0.325 | 0     | 0.325 | 0.325 |
| Thraupidae | <i>Tangara velia</i>             | 0     | 0.003 | 0     | 0     | 0     | 0     | 0.003 | 0     | 0     | 0     | 0     | 0.003 | 0     | 0     | 0     |
| Thraupidae | <i>Tangara viridicollis</i>      | 0.005 | 0.002 | 0.002 | 0.002 | 0.002 | 0     | 0.009 | 0     | 0     | 0     | 0     | 0.002 | 0     | 0     | 0     |
| Thraupidae | <i>Tangara xanthocephala</i>     | 0.908 | 0.987 | 0.987 | 0.987 | 0.987 | 0     | 0.125 | 0     | 0     | 0     | 0     | 0.018 | 0     | 0     | 0     |
| Thraupidae | <i>Tangara xanthogastra</i>      | 0     | 0.006 | 0     | 0     | 0     | 0     | 0.115 | 0     | 0     | 0     | 0     | 0.004 | 0     | 0     | 0     |
| Thraupidae | <i>Tersina viridis</i>           | 0     | 0.258 | 0     | 0     | 0     | 0     | 0.048 | 0     | 0     | 0     | 0     | 0.005 | 0     | 0     | 0     |
| Thraupidae | <i>Thlypopsis sordida</i>        | 0     | 0.034 | 0     | 0     | 0     | 0     | 0.884 | 0     | 0     | 0     | 0     | 0.002 | 0     | 0     | 0     |
| Thraupidae | <i>Thraupis bonariensis</i>      | 0.002 | 0.068 | 0.068 | 0.068 | 0.068 | 0.003 | 0.066 | 0.066 | 0.066 | 0.066 | 0.002 | 0.002 | 0.002 | 0.002 | 0.002 |
| Thraupidae | <i>Thraupis cyanocephala</i>     | 0.934 | 0.885 | 0.885 | 0.885 | 0.885 | 0.142 | 0.107 | 0.107 | 0.107 | 0.107 | 0     | 0.012 | 0     | 0     | 0     |
| Thraupidae | <i>Thraupis episcopus</i>        | 0     | 0.671 | 0     | 0     | 0     | 0     | 0.007 | 0     | 0     | 0     | 0     | 0.008 | 0     | 0     | 0     |
| Thraupidae | <i>Thraupis palmarum</i>         | 0     | 0.367 | 0     | 0     | 0     | 0     | 0.005 | 0     | 0     | 0     | 0     | 0.003 | 0     | 0     | 0     |
| Thraupidae | <i>Trichothraupis melanops</i>   | 0     | 0.019 | 0     | 0     | 0     | 0     | 0.026 | 0     | 0     | 0     | 0     | 0.001 | 0     | 0     | 0     |
| Tinamidae  | <i>Crypturellus atropicillus</i> | 0     | 0.007 | 0     | 0     | 0     | 0     | 0.008 | 0     | 0     | 0     | 0     | 0.008 | 0     | 0     | 0     |
| Tinamidae  | <i>Crypturellus bartletti</i>    | 0     | 0.005 | 0     | 0     | 0     | 0     | 0.004 | 0     | 0     | 0     | 0     | 0.005 | 0     | 0     | 0     |
| Tinamidae  | <i>Crypturellus cinereus</i>     | 0     | 0.001 | 0     | 0     | 0     | 0     | 0.001 | 0     | 0     | 0     | 0     | 0.001 | 0     | 0     | 0     |

|            |                                  |       |       |       |       |       |       |       |       |       |       |       |       |       |       |       |
|------------|----------------------------------|-------|-------|-------|-------|-------|-------|-------|-------|-------|-------|-------|-------|-------|-------|-------|
| Tinamidae  | <i>Crypturellus obsoletus</i>    | 0.326 | 0.012 | 0.012 | 0.012 | 0.012 | 0.021 | 0.899 | 0.899 | 0.899 | 0.899 | 0     | 0.003 | 0     | 0     | 0     |
| Tinamidae  | <i>Crypturellus soui</i>         | 0     | 0.447 | 0     | 0     | 0     | 0     | 0.051 | 0     | 0     | 0     | 0     | 0.003 | 0     | 0     | 0     |
| Tinamidae  | <i>Crypturellus strigulosus</i>  | 0     | 0.000 | 0     | 0     | 0     | 0     | 0.000 | 0     | 0     | 0     | 0     | 0.001 | 0     | 0     | 0     |
| Tinamidae  | <i>Crypturellus undulatus</i>    | 0     | 0.065 | 0     | 0     | 0     | 0     | 0.004 | 0     | 0     | 0     | 0     | 0.003 | 0     | 0     | 0     |
| Tinamidae  | <i>Crypturellus variegatus</i>   | 0     | 0.001 | 0     | 0     | 0     | 0     | 0.001 | 0     | 0     | 0     | 0     | 0.002 | 0     | 0     | 0     |
| Tinamidae  | <i>Nothocercus nigrocapillus</i> | 0.043 | 0.256 | 0.256 | 0.256 | 0.256 | 0.049 | 0.484 | 0.484 | 0.484 | 0.484 | 0     | 0.016 | 0     | 0.016 | 0.016 |
| Tinamidae  | <i>Tinamus guttatus</i>          | 0     | 0.002 | 0     | 0     | 0     | 0     | 0.001 | 0     | 0     | 0     | 0     | 0.001 | 0     | 0     | 0     |
| Tinamidae  | <i>Tinamus major</i>             | 0     | 0.003 | 0     | 0     | 0     | 0     | 0.004 | 0     | 0     | 0     | 0     | 0.003 | 0     | 0     | 0     |
| Tinamidae  | <i>Tinamus tao</i>               | 0     | 0.002 | 0     | 0     | 0     | 0     | 0.002 | 0     | 0     | 0     | 0     | 0.002 | 0     | 0     | 0     |
| Trogonidae | <i>Pharomachrus antisianus</i>   | 0     | 0.633 | 0     | 0.633 | 0.633 | 0     | 0.105 | 0     | 0     | 0     | 0     | 0.010 | 0     | 0     | 0     |
| Trogonidae | <i>Pharomachrus auriceps</i>     | 0.418 | 0.723 | 0.723 | 0.723 | 0.723 | 0.006 | 0.033 | 0.033 | 0.033 | 0.033 | 0     | 0.014 | 0     | 0     | 0     |
| Trogonidae | <i>Pharomachrus pavoninus</i>    | 0     | 0.017 | 0     | 0     | 0     | 0     | 0.122 | 0     | 0     | 0     | 0     | 0.173 | 0     | 0     | 0     |
| Trogonidae | <i>Trogon collaris</i>           | 0     | 0.325 | 0     | 0     | 0     | 0     | 0.021 | 0     | 0     | 0     | 0     | 0.314 | 0     | 0     | 0     |
| Trogonidae | <i>Trogon curucui</i>            | 0     | 0.003 | 0     | 0     | 0     | 0     | 0.006 | 0     | 0     | 0     | 0     | 0.003 | 0     | 0     | 0     |
| Trogonidae | <i>Trogon melanurus</i>          | 0     | 0.002 | 0     | 0     | 0     | 0     | 0.005 | 0     | 0     | 0     | 0     | 0.002 | 0     | 0     | 0     |
| Trogonidae | <i>Trogon personatus</i>         | 0.514 | 0.606 | 0.606 | 0.606 | 0.606 | 0.153 | 0.335 | 0.335 | 0.335 | 0.335 | 0.048 | 0.072 | 0.072 | 0.072 | 0.072 |
| Trogonidae | <i>Trogon violaceus</i>          | 0     | 0.030 | 0     | 0     | 0     | 0     | 0.015 | 0     | 0     | 0     | 0     | 0.020 | 0     | 0     | 0     |
| Trogonidae | <i>Trogon viridis</i>            | 0     | 0.006 | 0     | 0     | 0     | 0     | 0.005 | 0     | 0     | 0     | 0     | 0.004 | 0     | 0     | 0     |
| Turdidae   | <i>Catharus fuscater</i>         | 0.046 | 0.985 | 0.985 | 0.985 | 0.985 | 0     | 0.874 | 0     | 0.874 | 0.874 | 0     | 0.006 | 0     | 0     | 0     |
| Turdidae   | <i>Entomodestes leucotis</i>     | 0.009 | 0.066 | 0.066 | 0.066 | 0.066 | 0     | 0.022 | 0     | 0.022 | 0.022 | 0     | 0.006 | 0     | 0     | 0     |
| Turdidae   | <i>Myadestes ralloides</i>       | 0.788 | 0.996 | 0.996 | 0.996 | 0.996 | 0     | 0.319 | 0     | 0.319 | 0.319 | 0     | 0.002 | 0     | 0     | 0     |
| Turdidae   | <i>Turdus albicollis</i>         | 0     | 0.393 | 0     | 0     | 0     | 0     | 0.007 | 0     | 0     | 0     | 0     | 0.094 | 0     | 0     | 0     |
| Turdidae   | <i>Turdus chiguanco</i>          | 0.003 | 0.001 | 0.001 | 0.001 | 0.001 | 0.001 | 0.017 | 0.017 | 0.017 | 0.017 | 0.001 | 0.001 | 0.001 | 0.001 | 0.001 |
| Turdidae   | <i>Turdus fuscater</i>           | 0.917 | 0.366 | 0     | 0.366 | 0     | 0.014 | 0.013 | 0.013 | 0.013 | 0.013 | 0.629 | 0.753 | 0.753 | 0.753 | 0.753 |
| Turdidae   | <i>Turdus hauxwelli</i>          | 0     | 0.163 | 0     | 0     | 0     | 0     | 0.004 | 0     | 0     | 0     | 0     | 0.004 | 0     | 0     | 0     |
| Turdidae   | <i>Turdus ignobilis</i>          | 0     | 0.906 | 0     | 0     | 0     | 0     | 0.027 | 0     | 0     | 0     | 0     | 0.031 | 0     | 0     | 0     |
| Turdidae   | <i>Turdus leucops</i>            | 0.247 | 0.995 | 0.995 | 0.995 | 0.995 | 0     | 0.955 | 0     | 0     | 0     | 0     | 0.009 | 0     | 0     | 0     |
| Turdidae   | <i>Turdus nigriceps</i>          | 0     | 0.552 | 0     | 0     | 0     | 0     | 0.962 | 0     | 0     | 0     | 0     | 0.001 | 0     | 0     | 0     |
| Turdidae   | <i>Turdus serranus</i>           | 0.739 | 0.975 | 0.975 | 0.975 | 0.975 | 0.065 | 0.698 | 0.698 | 0.698 | 0.698 | 0     | 0.098 | 0     | 0.098 | 0.098 |
| Tyrannidae | <i>Elaenia albiceps</i>          | 0.322 | 0.144 | 0.144 | 0.144 | 0.144 | 0.128 | 0.020 | 0.020 | 0.020 | 0.020 | 0     | 0.303 | 0     | 0.303 | 0.303 |
| Tyrannidae | <i>Elaenia flavogaster</i>       | 0     | 0.865 | 0     | 0     | 0     | 0     | 0.019 | 0     | 0     | 0     | 0     | 0.004 | 0     | 0     | 0     |
| Tyrannidae | <i>Elaenia gigas</i>             | 0     | 0.049 | 0     | 0     | 0     | 0     | 0.047 | 0     | 0     | 0     | 0     | 0.021 | 0     | 0     | 0     |
| Tyrannidae | <i>Elaenia obscura</i>           | 0.254 | 0.347 | 0.347 | 0.347 | 0.347 | 0.567 | 0.916 | 0.916 | 0.916 | 0.916 | 0     | 0.069 | 0     | 0     | 0     |
| Tyrannidae | <i>Elaenia pallatangae</i>       | 0.322 | 0.913 | 0.913 | 0.913 | 0.913 | 0.015 | 0.880 | 0.880 | 0.880 | 0.880 | 0     | 0.005 | 0     | 0.005 | 0.005 |
| Tyrannidae | <i>Lophotriccus pileatus</i>     | 0     | 0.720 | 0     | 0     | 0     | 0     | 0.008 | 0     | 0     | 0     | 0     | 0.005 | 0     | 0     | 0     |
| Tyrannidae | <i>Mionectes macconnelli</i>     | 0     | 0.002 | 0     | 0     | 0     | 0     | 0.002 | 0     | 0     | 0     | 0     | 0.003 | 0     | 0     | 0     |
| Tyrannidae | <i>Mionectes oleagineus</i>      | 0     | 0.886 | 0     | 0     | 0     | 0     | 0.005 | 0     | 0     | 0     | 0     | 0.026 | 0     | 0     | 0     |
| Tyrannidae | <i>Mionectes olivaceus</i>       | 0     | 0.164 | 0     | 0     | 0     | 0     | 0.893 | 0     | 0     | 0     | 0     | 0.004 | 0     | 0     | 0     |
| Tyrannidae | <i>Mionectes striaticollis</i>   | 0.894 | 0.175 | 0.175 | 0.175 | 0.175 | 0.139 | 0.310 | 0.310 | 0.310 | 0.310 | 0     | 0.093 | 0     | 0.093 | 0.093 |
| Tyrannidae | <i>Zimmerius bolivianus</i>      | 0.009 | 0.082 | 0.082 | 0.082 | 0.082 | 0     | 0.236 | 0     | 0.236 | 0.236 | 0     | 0.001 | 0     | 0     | 0     |
| Tyrannidae | <i>Zimmerius gracilipes</i>      | 0     | 0.010 | 0     | 0     | 0     | 0     | 0.011 | 0     | 0     | 0     | 0     | 0.013 | 0     | 0     | 0     |

**Table S4.** Current and future community composition at all seven elevational levels, including probabilities of occurrence derived from species distribution models (SDMs) of all 232 frugivorous bird species of the Manú Biosphere Reserve (Peru). Based on the MIROC5 climate model, representative concentration pathway (RCP) 8.5. Species' elevational ranges were projected according to four potential dispersal scenarios: no range change, range contraction (lower range limit moves upwards), range expansion (upper range limit moves upwards), and range shift (both lower and upper range limit move upwards). SDMs were based on current and future local temperature and precipitation values.

|              |                                    | 500 m   |                 |             |           |       | 1000 m  |                 |             |           |       | 1500 m  |                 |             |           |       | 2000 m  |                 |             |           |       |
|--------------|------------------------------------|---------|-----------------|-------------|-----------|-------|---------|-----------------|-------------|-----------|-------|---------|-----------------|-------------|-----------|-------|---------|-----------------|-------------|-----------|-------|
| Family       | Bird species                       | current | no range change | contraction | expansion | shift | current | no range change | contraction | expansion | shift | current | no range change | contraction | expansion | shift | current | no range change | contraction | expansion | shift |
| Cardinalidae | <i>Cyanocopsa cyanoides</i>        | 0.354   | 0.980           | 0           | 0.980     | 0     | 0.965   | 0.990           | 0.990       | 0.990     | 0.990 | 0       | 0.898           | 0           | 0.898     | 0.898 | 0       | 0.981           | 0           | 0         | 0     |
| Cardinalidae | <i>Pheucticus aureoventris</i>     | 0       | 0.008           | 0           | 0         | 0     | 0.302   | 0.597           | 0           | 0.597     | 0     | 0.008   | 0.163           | 0.163       | 0.163     | 0.163 | 0.028   | 0.232           | 0.232       | 0.232     | 0.232 |
| Cardinalidae | <i>Pheucticus chrysogaster</i>     | 0       | 0.003           | 0           | 0         | 0     | 0.063   | 0.215           | 0           | 0.215     | 0     | 0.476   | 0.005           | 0.005       | 0.005     | 0.005 | 0.520   | 0.036           | 0.036       | 0.036     | 0.036 |
| Cardinalidae | <i>Saltator aurantiirostris</i>    | 0       | 0.002           | 0           | 0         | 0     | 0       | 0.002           | 0           | 0         | 0     | 0       | 0.002           | 0           | 0         | 0     | 0       | 0.003           | 0           | 0         | 0     |
| Cardinalidae | <i>Saltator coerulescens</i>       | 0.023   | 0.072           | 0           | 0.072     | 0     | 0       | 0.566           | 0           | 0.566     | 0.566 | 0       | 0.938           | 0           | 0         | 0     | 0       | 0.137           | 0           | 0         | 0     |
| Cardinalidae | <i>Saltator grossus</i>            | 0.195   | 0.886           | 0           | 0.886     | 0     | 0.988   | 0.976           | 0.976       | 0.976     | 0.976 | 0       | 0.963           | 0           | 0.963     | 0.963 | 0       | 0.621           | 0           | 0         | 0     |
| Cardinalidae | <i>Saltator maximus</i>            | 0.514   | 0.729           | 0           | 0.729     | 0     | 0.903   | 0.962           | 0.962       | 0.962     | 0.962 | 0.136   | 0.955           | 0.955       | 0.955     | 0.955 | 0.941   | 0.756           | 0.756       | 0.756     | 0.756 |
| Columbidae   | <i>Geotrygon montana</i>           | 0.731   | 0.893           | 0           | 0.893     | 0     | 0.270   | 0.880           | 0.880       | 0.880     | 0.880 | 0       | 0.819           | 0           | 0.819     | 0.819 | 0       | 0.831           | 0           | 0.831     | 0.831 |
| Columbidae   | <i>Patagioenas cayennensis</i>     | 0.067   | 0.730           | 0           | 0.730     | 0     | 0       | 0.045           | 0           | 0.045     | 0.045 | 0       | 0.989           | 0           | 0         | 0     | 0       | 0.717           | 0           | 0         | 0     |
| Columbidae   | <i>Patagioenas fasciata</i>        | 0       | 0.007           | 0           | 0         | 0     | 0       | 0.003           | 0           | 0         | 0     | 0.790   | 0.167           | 0           | 0.167     | 0     | 0.993   | 0.326           | 0.326       | 0.326     | 0.326 |
| Columbidae   | <i>Patagioenas plumbea</i>         | 0.075   | 0.088           | 0           | 0.088     | 0     | 0.344   | 0.768           | 0.768       | 0.768     | 0.768 | 0.030   | 0.991           | 0.991       | 0.991     | 0.991 | 0       | 0.899           | 0           | 0.899     | 0.899 |
| Columbidae   | <i>Patagioenas subvinacea</i>      | 0.008   | 0.136           | 0           | 0.136     | 0     | 0.593   | 0.980           | 0.980       | 0.980     | 0.980 | 0.698   | 0.967           | 0.967       | 0.967     | 0.967 | 0       | 0.758           | 0           | 0.758     | 0.758 |
| Corvidae     | <i>Cyanocorax cyanomelas</i>       | 0.338   | 0.004           | 0           | 0.004     | 0     | 0.496   | 0.972           | 0.972       | 0.972     | 0.972 | 0       | 0.761           | 0           | 0.761     | 0.761 | 0       | 0.260           | 0           | 0         | 0     |
| Corvidae     | <i>Cyanocorax violaceus</i>        | 0.544   | 0.278           | 0           | 0.278     | 0     | 0.207   | 0.991           | 0.991       | 0.991     | 0.991 | 0       | 0.955           | 0           | 0.955     | 0.955 | 0       | 0.599           | 0           | 0         | 0     |
| Corvidae     | <i>Cyanocorax yncas</i>            | 0       | 0.008           | 0           | 0         | 0     | 0       | 0.007           | 0           | 0         | 0     | 0.453   | 0.035           | 0           | 0.035     | 0     | 0.994   | 0.776           | 0.776       | 0.776     | 0.776 |
| Cotingidae   | <i>Ampelioides tschudii</i>        | 0       | 0.080           | 0           | 0         | 0     | 0.765   | 0.790           | 0           | 0.790     | 0     | 0       | 0.954           | 0           | 0.954     | 0.954 | 0       | 0.854           | 0           | 0         | 0     |
| Cotingidae   | <i>Ampelion rubrocristatus</i>     | 0       | 0.005           | 0           | 0         | 0     | 0       | 0.014           | 0           | 0         | 0     | 0       | 0.176           | 0           | 0         | 0     | 0       | 0.085           | 0           | 0         | 0     |
| Cotingidae   | <i>Ampelion rufaxilla</i>          | 0       | 0.024           | 0           | 0         | 0     | 0       | 0.036           | 0           | 0         | 0     | 0       | 0.352           | 0           | 0         | 0     | 0.953   | 0.554           | 0           | 0.554     | 0     |
| Cotingidae   | <i>Cephalopterus ornatus</i>       | 0.371   | 0.659           | 0           | 0.659     | 0     | 0.044   | 0.935           | 0.935       | 0.935     | 0.935 | 0.534   | 0.681           | 0.681       | 0.681     | 0.681 | 0       | 0.681           | 0           | 0.681     | 0.681 |
| Cotingidae   | <i>Conioptilon mcilhennyi</i>      | 0       | 0.001           | 0           | 0.001     | 0     | 0       | 0.431           | 0           | 0.431     | 0.431 | 0       | 0.094           | 0           | 0         | 0     | 0       | 0.069           | 0           | 0         | 0     |
| Cotingidae   | <i>Cotinga cayana</i>              | 0.070   | 0.024           | 0           | 0.024     | 0     | 0       | 0.589           | 0           | 0.589     | 0.589 | 0       | 0.218           | 0           | 0         | 0     | 0       | 0.166           | 0           | 0         | 0     |
| Cotingidae   | <i>Cotinga maynana</i>             | 0.023   | 0.000           | 0           | 0         | 0     | 0.271   | 0.994           | 0.994       | 0.994     | 0.994 | 0       | 0.338           | 0           | 0.338     | 0.338 | 0       | 0.000           | 0           | 0         | 0     |
| Cotingidae   | <i>Gymnoderus foetidus</i>         | 0.010   | 0.230           | 0           | 0.230     | 0     | 0       | 0.963           | 0           | 0.963     | 0.963 | 0       | 0.002           | 0           | 0         | 0     | 0       | 0.002           | 0           | 0         | 0     |
| Cotingidae   | <i>Iodopleura isabellae</i>        | 0.842   | 0.375           | 0           | 0.375     | 0     | 0       | 0.990           | 0           | 0.990     | 0.990 | 0       | 0.498           | 0           | 0         | 0     | 0       | 0.005           | 0           | 0         | 0     |
| Cotingidae   | <i>Laniocera hypopyrra</i>         | 0.016   | 0.015           | 0           | 0.015     | 0     | 0       | 0.890           | 0           | 0.890     | 0.890 | 0       | 0.126           | 0           | 0         | 0     | 0       | 0.023           | 0           | 0         | 0     |
| Cotingidae   | <i>Lipaugus vociferans</i>         | 0.041   | 0.012           | 0           | 0.012     | 0     | 0       | 0.984           | 0           | 0.984     | 0.984 | 0       | 0.006           | 0           | 0         | 0     | 0       | 0.018           | 0           | 0         | 0     |
| Cotingidae   | <i>Oxyruncus cristatus</i>         | 0       | 0.059           | 0           | 0         | 0     | 0.729   | 0.171           | 0           | 0.171     | 0     | 0       | 0.267           | 0           | 0.267     | 0.267 | 0       | 0.641           | 0           | 0         | 0     |
| Cotingidae   | <i>Pipreola arcuata</i>            | 0       | 0.001           | 0           | 0         | 0     | 0       | 0.006           | 0           | 0         | 0     | 0       | 0.010           | 0           | 0         | 0     | 0.906   | 0.022           | 0           | 0.022     | 0     |
| Cotingidae   | <i>Pipreola frontalis</i>          | 0       | 0.025           | 0           | 0         | 0     | 0.926   | 0.712           | 0           | 0.712     | 0     | 0.913   | 0.906           | 0           | 0.906     | 0     | 0       | 0.916           | 0           | 0.916     | 0.916 |
| Cotingidae   | <i>Pipreola intermedia</i>         | 0       | 0.003           | 0           | 0         | 0     | 0       | 0.003           | 0           | 0         | 0     | 0.036   | 0.010           | 0           | 0.010     | 0     | 0.054   | 0.007           | 0.007       | 0.007     | 0.007 |
| Cotingidae   | <i>Porphyrolaema porphyrolaema</i> | 0       | 0.022           | 0           | 0.022     | 0     | 0       | 0.664           | 0           | 0.664     | 0.664 | 0       | 0.231           | 0           | 0         | 0     | 0       | 0.098           | 0           | 0         | 0     |
| Cotingidae   | <i>Querula purpurata</i>           | 0.021   | 0.011           | 0           | 0.011     | 0     | 0.436   | 0.944           | 0.944       | 0.944     | 0.944 | 0       | 0.950           | 0           | 0.950     | 0.950 | 0       | 0.882           | 0           | 0         | 0     |
| Cotingidae   | <i>Rupicola peruvianus</i>         | 0       | 0.003           | 0           | 0         | 0     | 0.996   | 0.311           | 0           | 0.311     | 0     | 0.995   | 0.930           | 0.930       | 0.930     | 0.930 | 0.909   | 0.995           | 0.995       | 0.995     | 0.995 |
| Cotingidae   | <i>Snowornis subalaris</i>         | 0       | 0.010           | 0           | 0         | 0     | 0.976   | 0.970           | 0           | 0.970     | 0     | 0       | 0.945           | 0           | 0.945     | 0.945 | 0       | 0.921           | 0           | 0         | 0     |
| Cotingidae   | <i>Tityra cayana</i>               | 0       | 0.077           | 0           | 0.077     | 0     | 0       | 0.874           | 0           | 0.874     | 0.874 | 0       | 0.332           | 0           | 0         | 0     | 0       | 0.220           | 0           | 0         | 0     |
| Cotingidae   | <i>Tityra inquisitor</i>           | 0.856   | 0.462           | 0           | 0.462     | 0     | 0       | 0.706           | 0           | 0.706     | 0.706 | 0       | 0.966           | 0           | 0         | 0     | 0       | 0.986           | 0           | 0         | 0     |

|                |                                    |       |       |   |       |   |       |       |       |       |       |       |       |       |       |       |       |       |       |       |       |
|----------------|------------------------------------|-------|-------|---|-------|---|-------|-------|-------|-------|-------|-------|-------|-------|-------|-------|-------|-------|-------|-------|-------|
| Cotingidae     | <i>Tityra semifasciata</i>         | 0.424 | 0.867 | 0 | 0.867 | 0 | 0.967 | 0.976 | 0.976 | 0.976 | 0.976 | 0.984 | 0.990 | 0.990 | 0.990 | 0.990 | 0     | 0.708 | 0     | 0.708 | 0.708 |
| Cracidae       | <i>Aburria aburri</i>              | 0     | 0.016 | 0 | 0     | 0 | 0.985 | 0.996 | 0     | 0.996 | 0     | 0.995 | 0.931 | 0.931 | 0.931 | 0.931 | 0     | 0.998 | 0     | 0.998 | 0.998 |
| Cracidae       | <i>Mitu tuberosum</i>              | 0.903 | 0.336 | 0 | 0.336 | 0 | 0.044 | 0.993 | 0.993 | 0.993 | 0.993 | 0     | 0.192 | 0     | 0.192 | 0.192 | 0     | 0.010 | 0     | 0     | 0     |
| Cracidae       | <i>Ortalis guttata</i>             | 0.577 | 0.020 | 0 | 0.020 | 0 | 0.978 | 0.649 | 0.649 | 0.649 | 0.649 | 0.136 | 0.990 | 0.990 | 0.990 | 0.990 | 0     | 0.974 | 0     | 0.974 | 0.974 |
| Cracidae       | <i>Penelope jacquacu</i>           | 0.078 | 0.022 | 0 | 0.022 | 0 | 0.139 | 0.988 | 0.988 | 0.988 | 0.988 | 0.004 | 0.821 | 0.821 | 0.821 | 0.821 | 0     | 0.189 | 0     | 0.189 | 0.189 |
| Cracidae       | <i>Penelope montagnii</i>          | 0     | 0.007 | 0 | 0     | 0 | 0.224 | 0.008 | 0     | 0.008 | 0     | 0.109 | 0.588 | 0.588 | 0.588 | 0.588 | 0.491 | 0.036 | 0.036 | 0.036 | 0.036 |
| Cracidae       | <i>Pipile cumanensis</i>           | 0.113 | 0.024 | 0 | 0.024 | 0 | 0     | 0.983 | 0     | 0.983 | 0.983 | 0     | 0.493 | 0     | 0     | 0     | 0     | 0.006 | 0     | 0     | 0     |
| Icteridae      | <i>Cacicus cela</i>                | 0.789 | 0.071 | 0 | 0.071 | 0 | 0.008 | 0.868 | 0.868 | 0.868 | 0.868 | 0     | 0.189 | 0     | 0.189 | 0.189 | 0     | 0.711 | 0     | 0     | 0     |
| Icteridae      | <i>Cacicus chrysonotus</i>         | 0     | 0.002 | 0 | 0     | 0 | 0     | 0.005 | 0     | 0     | 0     | 0     | 0.628 | 0     | 0     | 0     | 0     | 0.287 | 0     | 0     | 0     |
| Icteridae      | <i>Cacicus haemorrhous</i>         | 0.006 | 0.040 | 0 | 0.040 | 0 | 0.007 | 0.041 | 0.041 | 0.041 | 0.041 | 0     | 0.067 | 0     | 0.067 | 0.067 | 0     | 0.114 | 0     | 0     | 0     |
| Icteridae      | <i>Clypicterus oseryi</i>          | 0.988 | 0.026 | 0 | 0.026 | 0 | 0     | 0.996 | 0     | 0.996 | 0.996 | 0     | 0.192 | 0     | 0     | 0     | 0     | 0.066 | 0     | 0     | 0     |
| Icteridae      | <i>Icterus icterus</i>             | 0.074 | 0.484 | 0 | 0.484 | 0 | 0     | 0.080 | 0     | 0.080 | 0.080 | 0     | 0.040 | 0     | 0     | 0     | 0     | 0.049 | 0     | 0     | 0     |
| Icteridae      | <i>Molothrus oryzivorus</i>        | 0.216 | 0.059 | 0 | 0.059 | 0 | 0     | 0.778 | 0     | 0.778 | 0.778 | 0     | 0.258 | 0     | 0     | 0     | 0     | 0.905 | 0     | 0     | 0     |
| Icteridae      | <i>Psarocolius angustifrons</i>    | 0.244 | 0.005 | 0 | 0.005 | 0 | 0.493 | 0.981 | 0.981 | 0.981 | 0.981 | 0.073 | 0.943 | 0.943 | 0.943 | 0.943 | 0.707 | 0.954 | 0.954 | 0.954 | 0.954 |
| Icteridae      | <i>Psarocolius atrovirens</i>      | 0     | 0.002 | 0 | 0     | 0 | 0.699 | 0.012 | 0     | 0.012 | 0     | 0.775 | 0.546 | 0     | 0.546 | 0     | 0.551 | 0.982 | 0.982 | 0.982 | 0.982 |
| Icteridae      | <i>Psarocolius bifasciatus</i>     | 0.932 | 0.483 | 0 | 0.483 | 0 | 0     | 0.804 | 0     | 0.804 | 0.804 | 0     | 0.518 | 0     | 0.518 | 0.518 | 0     | 0.862 | 0     | 0     | 0     |
| Icteridae      | <i>Psarocolius decumanus</i>       | 0.892 | 0.262 | 0 | 0.262 | 0 | 0.978 | 0.786 | 0.786 | 0.786 | 0.786 | 0     | 0.408 | 0     | 0.408 | 0.408 | 0     | 0.933 | 0     | 0     | 0     |
| Odontophoridae | <i>Odontophorus balliviani</i>     | 0     | 0.040 | 0 | 0     | 0 | 0.148 | 0.005 | 0     | 0.005 | 0     | 0.956 | 0.090 | 0.090 | 0.090 | 0.090 | 0.955 | 0.062 | 0.062 | 0.062 | 0.062 |
| Odontophoridae | <i>Odontophorus speciosus</i>      | 0     | 0.007 | 0 | 0     | 0 | 0.981 | 0.031 | 0     | 0.031 | 0     | 0.828 | 0.981 | 0     | 0.981 | 0     | 0.418 | 0.988 | 0.988 | 0.988 | 0.988 |
| Odontophoridae | <i>Odontophorus stellatus</i>      | 0.016 | 0.003 | 0 | 0.003 | 0 | 0.253 | 0.998 | 0.998 | 0.998 | 0.998 | 0     | 0.253 | 0     | 0.253 | 0.253 | 0     | 0.134 | 0     | 0     | 0     |
| Picidae        | <i>Celeus elegans</i>              | 0.109 | 0.058 | 0 | 0.058 | 0 | 0     | 0.981 | 0     | 0.981 | 0.981 | 0     | 0.003 | 0     | 0     | 0     | 0     | 0.003 | 0     | 0     | 0     |
| Picidae        | <i>Celeus flavus</i>               | 0.201 | 0.158 | 0 | 0.158 | 0 | 0     | 0.827 | 0     | 0.827 | 0.827 | 0     | 0.018 | 0     | 0     | 0     | 0     | 0.008 | 0     | 0     | 0     |
| Picidae        | <i>Celeus grammicus</i>            | 0.791 | 0.408 | 0 | 0.408 | 0 | 0.030 | 0.993 | 0.993 | 0.993 | 0.993 | 0     | 0.093 | 0     | 0.093 | 0.093 | 0     | 0.038 | 0     | 0     | 0     |
| Picidae        | <i>Celeus spectabilis</i>          | 0.201 | 0.000 | 0 | 0     | 0 | 0     | 1.000 | 0     | 1.000 | 1.000 | 0     | 0.315 | 0     | 0     | 0     | 0     | 0.257 | 0     | 0     | 0     |
| Picidae        | <i>Celeus torquatus</i>            | 0.190 | 0.226 | 0 | 0.226 | 0 | 0     | 0.334 | 0     | 0.334 | 0.334 | 0     | 0.012 | 0     | 0     | 0     | 0     | 0.011 | 0     | 0     | 0     |
| Picidae        | <i>Colaptes rubiginosus</i>        | 0     | 0.005 | 0 | 0     | 0 | 0.985 | 0.603 | 0     | 0.603 | 0     | 0.995 | 0.980 | 0.980 | 0.980 | 0.980 | 0.986 | 0.950 | 0.950 | 0.950 | 0.950 |
| Pipridae       | <i>Chiroxiphia boliviana</i>       | 0     | 0.007 | 0 | 0     | 0 | 0.142 | 0.135 | 0     | 0.135 | 0     | 0.123 | 0.905 | 0.905 | 0.905 | 0.905 | 0.028 | 0.881 | 0.881 | 0.881 | 0.881 |
| Pipridae       | <i>Chiroxiphia pareola</i>         | 0.463 | 0.150 | 0 | 0.150 | 0 | 0     | 0.923 | 0     | 0.923 | 0.923 | 0     | 0.314 | 0     | 0     | 0     | 0     | 0.041 | 0     | 0     | 0     |
| Pipridae       | <i>Lepidothrix coerulescapilla</i> | 0     | 0.007 | 0 | 0     | 0 | 0.972 | 0.556 | 0     | 0.556 | 0     | 0.044 | 0.984 | 0.984 | 0.984 | 0.984 | 0     | 0.951 | 0     | 0.951 | 0.951 |
| Pipridae       | <i>Lepidothrix coronata</i>        | 0.825 | 0.187 | 0 | 0.187 | 0 | 0     | 0.969 | 0     | 0.969 | 0.969 | 0     | 0.672 | 0     | 0     | 0     | 0     | 0.213 | 0     | 0     | 0     |
| Pipridae       | <i>Machaeropterus pyrocephalus</i> | 0.074 | 0.004 | 0 | 0.004 | 0 | 0.240 | 0.986 | 0.986 | 0.986 | 0.986 | 0     | 0.064 | 0     | 0.064 | 0.064 | 0     | 0.121 | 0     | 0     | 0     |
| Pipridae       | <i>Manacus manacus</i>             | 0.895 | 0.951 | 0 | 0.951 | 0 | 0     | 0.958 | 0     | 0.958 | 0.958 | 0     | 0.994 | 0     | 0.994 | 0.994 | 0     | 0.442 | 0     | 0     | 0     |
| Pipridae       | <i>Neopelma sulphureiventer</i>    | 0.311 | 0.083 | 0 | 0.083 | 0 | 0     | 0.130 | 0     | 0.130 | 0.130 | 0     | 0.039 | 0     | 0     | 0     | 0     | 0.037 | 0     | 0     | 0     |
| Pipridae       | <i>Pipra chloromeros</i>           | 0.409 | 0.013 | 0 | 0.013 | 0 | 0.851 | 0.762 | 0.762 | 0.762 | 0.762 | 0     | 0.386 | 0     | 0.386 | 0.386 | 0     | 0.740 | 0     | 0     | 0     |
| Pipridae       | <i>Pipra fasciicauda</i>           | 0.005 | 0.003 | 0 | 0.003 | 0 | 0.413 | 0.985 | 0.985 | 0.985 | 0.985 | 0     | 0.679 | 0     | 0.679 | 0.679 | 0     | 0.318 | 0     | 0     | 0     |
| Pipridae       | <i>Pipropipo holochlora</i>        | 0.983 | 0.262 | 0 | 0.262 | 0 | 0.799 | 0.990 | 0.990 | 0.990 | 0.990 | 0     | 0.881 | 0     | 0.881 | 0.881 | 0     | 0.967 | 0     | 0     | 0     |
| Pipridae       | <i>Xenopipo unicolor</i>           | 0     | 0.002 | 0 | 0     | 0 | 0.500 | 0.056 | 0     | 0.056 | 0     | 0.916 | 0.810 | 0     | 0.810 | 0     | 0     | 0.875 | 0     | 0.875 | 0.875 |
| Psittacidae    | <i>Amazona farinosa</i>            | 0.033 | 0.573 | 0 | 0.573 | 0 | 0.034 | 0.987 | 0.987 | 0.987 | 0.987 | 0     | 0.971 | 0     | 0.971 | 0.971 | 0     | 0.055 | 0     | 0     | 0     |
| Psittacidae    | <i>Amazona mercenaria</i>          | 0     | 0.028 | 0 | 0     | 0 | 0.974 | 0.511 | 0     | 0.511 | 0     | 0.974 | 0.811 | 0.811 | 0.811 | 0.811 | 0.977 | 0.973 | 0.973 | 0.973 | 0.973 |
| Psittacidae    | <i>Amazona ochrocephala</i>        | 0.009 | 0.314 | 0 | 0.314 | 0 | 0     | 0.937 | 0     | 0.937 | 0.937 | 0     | 0.043 | 0     | 0     | 0     | 0     | 0.009 | 0     | 0     | 0     |
| Psittacidae    | <i>Ara ararauna</i>                | 0.506 | 0.070 | 0 | 0.070 | 0 | 0.010 | 0.939 | 0.939 | 0.939 | 0.939 | 0     | 0.012 | 0     | 0.012 | 0.012 | 0     | 0.027 | 0     | 0     | 0     |
| Psittacidae    | <i>Ara chloropterus</i>            | 0.079 | 0.194 | 0 | 0.194 | 0 | 0.004 | 0.847 | 0.847 | 0.847 | 0.847 | 0     | 0.016 | 0     | 0.016 | 0.016 | 0     | 0.006 | 0     | 0     | 0     |
| Psittacidae    | <i>Ara macao</i>                   | 0.007 | 0.022 | 0 | 0.022 | 0 | 0.070 | 0.127 | 0.127 | 0.127 | 0.127 | 0     | 0.097 | 0     | 0.097 | 0.097 | 0     | 0.110 | 0     | 0     | 0     |
| Psittacidae    | <i>Ara militaris</i>               | 0     | 0.051 | 0 | 0     | 0 | 0.994 | 0.929 | 0     | 0.929 | 0     | 0.747 | 0.995 | 0.995 | 0.995 | 0.995 | 0     | 0.761 | 0     | 0.761 | 0.761 |
| Psittacidae    | <i>Ara severus</i>                 | 0.114 | 0.945 | 0 | 0.945 | 0 | 0.120 | 0.990 | 0.990 | 0.990 | 0.990 | 0     | 0.991 | 0     | 0.991 | 0.991 | 0     | 0.061 | 0     | 0     | 0     |
| Psittacidae    | <i>Aratinga leucophthalma</i>      | 0.019 | 0.011 | 0 | 0.011 | 0 | 0.021 | 0.832 | 0.832 | 0.832 | 0.832 | 0.006 | 0.165 | 0.165 | 0.165 | 0.165 | 0     | 0.195 | 0     | 0.195 | 0.195 |
| Psittacidae    | <i>Aratinga mitrata</i>            | 0     | 0.001 | 0 | 0     | 0 | 0     | 0.001 | 0     | 0     | 0     | 0     | 0.016 | 0     | 0     | 0     | 0.001 | 0.003 | 0     | 0.003 | 0     |
| Psittacidae    | <i>Aratinga weddellii</i>          | 0.179 | 0.003 | 0 | 0.003 | 0 | 0     | 0.877 | 0     | 0.877 | 0.877 | 0     | 0.156 | 0     | 0     | 0     | 0     | 0.030 | 0     | 0     | 0     |
| Psittacidae    | <i>Bolborhynchus lineola</i>       | 0     | 0.022 | 0 | 0     | 0 | 0     | 0.061 | 0     | 0     | 0     | 0.766 | 0.179 | 0     | 0.179 | 0     | 0.800 | 0.414 | 0.414 | 0.414 | 0.414 |
| Psittacidae    | <i>Bolborhynchus orbyngnesius</i>  | 0     | 0.011 | 0 | 0     | 0 | 0     | 0.011 | 0     | 0     | 0     | 0     | 0.049 | 0     | 0     | 0     | 0     | 0.049 | 0     | 0     | 0     |





|            |                                     |       |       |   |       |   |       |       |       |       |       |       |       |       |       |       |       |       |       |       |       |
|------------|-------------------------------------|-------|-------|---|-------|---|-------|-------|-------|-------|-------|-------|-------|-------|-------|-------|-------|-------|-------|-------|-------|
| Thraupidae | <i>Delothraupis castaneiventris</i> | 0     | 0.004 | 0 | 0     | 0 | 0     | 0.009 | 0     | 0     | 0     | 0     | 0.080 | 0     | 0     | 0     | 0     | 0.219 | 0     | 0     | 0     |
| Thraupidae | <i>Diglossa brunneiventris</i>      | 0     | 0.001 | 0 | 0     | 0 | 0     | 0.001 | 0     | 0     | 0     | 0     | 0.001 | 0     | 0     | 0     | 0     | 0.001 | 0     | 0     | 0     |
| Thraupidae | <i>Diglossa caerulescens</i>        | 0     | 0.005 | 0 | 0     | 0 | 0     | 0.004 | 0     | 0     | 0     | 0.041 | 0.132 | 0     | 0.132 | 0     | 0.021 | 0.622 | 0.622 | 0.622 | 0.622 |
| Thraupidae | <i>Diglossa cyanea</i>              | 0     | 0.002 | 0 | 0     | 0 | 0     | 0.020 | 0     | 0     | 0     | 0.075 | 0.096 | 0     | 0.096 | 0     | 0.982 | 0.072 | 0.072 | 0.072 | 0.072 |
| Thraupidae | <i>Diglossa glauca</i>              | 0     | 0.049 | 0 | 0     | 0 | 0.986 | 0.627 | 0     | 0.627 | 0     | 0.983 | 0.980 | 0     | 0.980 | 0     | 0.950 | 0.983 | 0.983 | 0.983 | 0.983 |
| Thraupidae | <i>Diglossa mystacalis</i>          | 0     | 0.001 | 0 | 0     | 0 | 0     | 0.001 | 0     | 0     | 0     | 0     | 0.047 | 0     | 0     | 0     | 0     | 0.013 | 0     | 0     | 0     |
| Thraupidae | <i>Diglossa sittoides</i>           | 0     | 0.002 | 0 | 0     | 0 | 0     | 0.005 | 0     | 0     | 0     | 0     | 0.491 | 0     | 0     | 0     | 0.967 | 0.700 | 0     | 0.700 | 0     |
| Thraupidae | <i>Dubusia taeniata</i>             | 0     | 0.001 | 0 | 0     | 0 | 0     | 0.001 | 0     | 0     | 0     | 0     | 0.002 | 0     | 0     | 0     | 0.106 | 0.006 | 0     | 0.006 | 0     |
| Thraupidae | <i>Euphonia chlorotica</i>          | 0     | 0.074 | 0 | 0.074 | 0 | 0     | 0.008 | 0     | 0.008 | 0.008 | 0     | 0.009 | 0     | 0     | 0     | 0     | 0.115 | 0     | 0     | 0     |
| Thraupidae | <i>Euphonia chrysopasta</i>         | 0.882 | 0.074 | 0 | 0.074 | 0 | 0     | 0.961 | 0     | 0.961 | 0.961 | 0     | 0.867 | 0     | 0.867 | 0.867 | 0     | 0.393 | 0     | 0     | 0     |
| Thraupidae | <i>Euphonia laniirostris</i>        | 0.020 | 0.188 | 0 | 0.188 | 0 | 0.794 | 0.863 | 0.863 | 0.863 | 0.863 | 0.909 | 0.824 | 0.824 | 0.824 | 0.824 | 0     | 0.782 | 0     | 0.782 | 0.782 |
| Thraupidae | <i>Euphonia mesochrysa</i>          | 0     | 0.075 | 0 | 0     | 0 | 0.968 | 0.034 | 0     | 0.034 | 0     | 0.935 | 0.970 | 0.970 | 0.970 | 0.970 | 0     | 0.960 | 0     | 0.960 | 0.960 |
| Thraupidae | <i>Euphonia minuta</i>              | 0.517 | 0.121 | 0 | 0.121 | 0 | 0.394 | 0.743 | 0.743 | 0.743 | 0.743 | 0     | 0.544 | 0     | 0.544 | 0.544 | 0     | 0.402 | 0     | 0     | 0     |
| Thraupidae | <i>Euphonia rufiventris</i>         | 0.157 | 0.192 | 0 | 0.192 | 0 | 0     | 0.991 | 0     | 0.991 | 0.991 | 0     | 0.098 | 0     | 0.098 | 0.098 | 0     | 0.619 | 0     | 0     | 0     |
| Thraupidae | <i>Euphonia xanthogaster</i>        | 0.950 | 0.305 | 0 | 0.305 | 0 | 0.988 | 0.272 | 0.272 | 0.272 | 0.272 | 0.655 | 0.989 | 0.989 | 0.989 | 0.989 | 0.914 | 0.958 | 0.958 | 0.958 | 0.958 |
| Thraupidae | <i>Iridophanes pulcherrimus</i>     | 0     | 0.006 | 0 | 0     | 0 | 0     | 0.000 | 0     | 0     | 0     | 0.984 | 0.396 | 0     | 0.396 | 0     | 0     | 0.874 | 0     | 0.874 | 0.874 |
| Thraupidae | <i>Iridosornis analis</i>           | 0     | 0.011 | 0 | 0     | 0 | 0.983 | 0.050 | 0     | 0.050 | 0     | 0.864 | 0.793 | 0     | 0.793 | 0     | 0.886 | 0.991 | 0.991 | 0.991 | 0.991 |
| Thraupidae | <i>Iridosornis jelskii</i>          | 0     | 0.018 | 0 | 0     | 0 | 0     | 0.551 | 0     | 0     | 0     | 0     | 0.743 | 0     | 0     | 0     | 0     | 0.171 | 0     | 0     | 0     |
| Thraupidae | <i>Lamprospiza melanoleuca</i>      | 0.004 | 0.004 | 0 | 0.004 | 0 | 0     | 0.637 | 0     | 0.637 | 0.637 | 0     | 0.004 | 0     | 0     | 0     | 0     | 0.004 | 0     | 0     | 0     |
| Thraupidae | <i>Pipraeidea melanonota</i>        | 0.441 | 0.003 | 0 | 0.003 | 0 | 0.510 | 0.629 | 0.629 | 0.629 | 0.629 | 0.310 | 0.325 | 0.325 | 0.325 | 0.325 | 0.480 | 0.784 | 0.784 | 0.784 | 0.784 |
| Thraupidae | <i>Piranga leucoptera</i>           | 0     | 0.060 | 0 | 0     | 0 | 0.963 | 0.013 | 0     | 0.013 | 0     | 0.860 | 0.992 | 0.992 | 0.992 | 0.992 | 0     | 0.771 | 0     | 0.771 | 0.771 |
| Thraupidae | <i>Ramphocelus carbo</i>            | 0.188 | 0.132 | 0 | 0.132 | 0 | 0.366 | 0.636 | 0.636 | 0.636 | 0.636 | 0.103 | 0.398 | 0.398 | 0.398 | 0.398 | 0     | 0.907 | 0     | 0.907 | 0.907 |
| Thraupidae | <i>Ramphocelus nigrogularis</i>     | 0.027 | 0.002 | 0 | 0.002 | 0 | 0.070 | 0.728 | 0.728 | 0.728 | 0.728 | 0     | 0.292 | 0     | 0.292 | 0.292 | 0     | 0.004 | 0     | 0     | 0     |
| Thraupidae | <i>Schistochlamys melanopsis</i>    | 0     | 0.901 | 0 | 0     | 0 | 0.931 | 0.838 | 0     | 0.838 | 0     | 0.239 | 0.993 | 0.993 | 0.993 | 0.993 | 0.044 | 0.330 | 0.330 | 0.330 | 0.330 |
| Thraupidae | <i>Tachyphonus cristatus</i>        | 0     | 0.053 | 0 | 0.053 | 0 | 0     | 0.853 | 0     | 0.853 | 0.853 | 0     | 0.542 | 0     | 0     | 0     | 0     | 0.473 | 0     | 0     | 0     |
| Thraupidae | <i>Tachyphonus rufiventer</i>       | 0.676 | 0.028 | 0 | 0.028 | 0 | 0.982 | 0.993 | 0.993 | 0.993 | 0.993 | 0     | 0.983 | 0     | 0.983 | 0.983 | 0     | 0.646 | 0     | 0     | 0     |
| Thraupidae | <i>Tangara arthus</i>               | 0     | 0.003 | 0 | 0     | 0 | 0.985 | 0.388 | 0     | 0.388 | 0     | 0.636 | 0.972 | 0.972 | 0.972 | 0.972 | 0     | 0.962 | 0     | 0.962 | 0.962 |
| Thraupidae | <i>Tangara callophrys</i>           | 0.830 | 0.011 | 0 | 0.011 | 0 | 0     | 0.978 | 0     | 0.978 | 0.978 | 0     | 0.680 | 0     | 0.680 | 0.680 | 0     | 0.053 | 0     | 0     | 0     |
| Thraupidae | <i>Tangara chilensis</i>            | 0.278 | 0.005 | 0 | 0.005 | 0 | 0.976 | 0.898 | 0.898 | 0.898 | 0.898 | 0.243 | 0.847 | 0.847 | 0.847 | 0.847 | 0     | 0.945 | 0     | 0.945 | 0.945 |
| Thraupidae | <i>Tangara chrysotis</i>            | 0     | 0.046 | 0 | 0     | 0 | 0.986 | 0.232 | 0     | 0.232 | 0     | 0.779 | 0.993 | 0.993 | 0.993 | 0.993 | 0.154 | 0.295 | 0.295 | 0.295 | 0.295 |
| Thraupidae | <i>Tangara cyanicollis</i>          | 0.548 | 0.248 | 0 | 0.248 | 0 | 0.988 | 0.762 | 0     | 0.762 | 0     | 0.749 | 0.953 | 0.953 | 0.953 | 0.953 | 0.724 | 0.977 | 0.977 | 0.977 | 0.977 |
| Thraupidae | <i>Tangara cyanotis</i>             | 0     | 0.010 | 0 | 0     | 0 | 0     | 0.283 | 0     | 0     | 0     | 0.932 | 0.738 | 0     | 0.738 | 0     | 0.948 | 0.903 | 0.903 | 0.903 | 0.903 |
| Thraupidae | <i>Tangara gyrola</i>               | 0.419 | 0.020 | 0 | 0.020 | 0 | 0.992 | 0.236 | 0.236 | 0.236 | 0.236 | 0.898 | 0.972 | 0.972 | 0.972 | 0.972 | 0     | 0.994 | 0     | 0.994 | 0.994 |
| Thraupidae | <i>Tangara mexicana</i>             | 0.389 | 0.027 | 0 | 0.027 | 0 | 0.243 | 0.991 | 0.991 | 0.991 | 0.991 | 0     | 0.263 | 0     | 0.263 | 0.263 | 0     | 0.012 | 0     | 0     | 0     |
| Thraupidae | <i>Tangara nigrocincta</i>          | 0.978 | 0.069 | 0 | 0.069 | 0 | 0.564 | 0.998 | 0.998 | 0.998 | 0.998 | 0     | 0.784 | 0     | 0.784 | 0.784 | 0     | 0.753 | 0     | 0     | 0     |
| Thraupidae | <i>Tangara nigroviridis</i>         | 0     | 0.004 | 0 | 0     | 0 | 0     | 0.009 | 0     | 0     | 0     | 0.962 | 0.186 | 0     | 0.186 | 0     | 0.992 | 0.885 | 0.885 | 0.885 | 0.885 |
| Thraupidae | <i>Tangara parzudakii</i>           | 0     | 0.003 | 0 | 0     | 0 | 0     | 0.007 | 0     | 0     | 0     | 0.995 | 0.139 | 0     | 0.139 | 0     | 0.991 | 0.318 | 0.318 | 0.318 | 0.318 |
| Thraupidae | <i>Tangara punctata</i>             | 0     | 0.033 | 0 | 0     | 0 | 0.989 | 0.952 | 0     | 0.952 | 0     | 0.427 | 0.869 | 0.869 | 0.869 | 0.869 | 0.277 | 0.855 | 0.855 | 0.855 | 0.855 |
| Thraupidae | <i>Tangara ruficervix</i>           | 0     | 0.005 | 0 | 0     | 0 | 0.978 | 0.013 | 0     | 0.013 | 0     | 0.987 | 0.421 | 0     | 0.421 | 0     | 0.991 | 0.197 | 0.197 | 0.197 | 0.197 |
| Thraupidae | <i>Tangara schrankii</i>            | 0.203 | 0.003 | 0 | 0.003 | 0 | 0.231 | 0.969 | 0.969 | 0.969 | 0.969 | 0     | 0.962 | 0     | 0.962 | 0.962 | 0     | 0.679 | 0     | 0     | 0     |
| Thraupidae | <i>Tangara vassorii</i>             | 0     | 0.008 | 0 | 0     | 0 | 0     | 0.012 | 0     | 0     | 0     | 0     | 0.182 | 0     | 0     | 0     | 0.545 | 0.263 | 0     | 0.263 | 0     |
| Thraupidae | <i>Tangara velia</i>                | 0.926 | 0.126 | 0 | 0.126 | 0 | 0     | 0.993 | 0     | 0.993 | 0.993 | 0     | 0.094 | 0     | 0     | 0     | 0     | 0.006 | 0     | 0     | 0     |
| Thraupidae | <i>Tangara viridicollis</i>         | 0     | 0.014 | 0 | 0     | 0 | 0.066 | 0.002 | 0     | 0.002 | 0     | 0.023 | 0.004 | 0.004 | 0.004 | 0.004 | 0.133 | 0.297 | 0.297 | 0.297 | 0.297 |
| Thraupidae | <i>Tangara xanthocephala</i>        | 0     | 0.002 | 0 | 0     | 0 | 0.871 | 0.003 | 0     | 0.003 | 0     | 0.459 | 0.285 | 0     | 0.285 | 0     | 0.974 | 0.790 | 0.790 | 0.790 | 0.790 |
| Thraupidae | <i>Tangara xanthogastra</i>         | 0.583 | 0.045 | 0 | 0.045 | 0 | 0.926 | 0.992 | 0.992 | 0.992 | 0.992 | 0     | 0.971 | 0     | 0.971 | 0.971 | 0     | 0.322 | 0     | 0     | 0     |
| Thraupidae | <i>Tersina viridis</i>              | 0.590 | 0.285 | 0 | 0.285 | 0 | 0.994 | 0.570 | 0.570 | 0.570 | 0.570 | 0     | 0.887 | 0     | 0.887 | 0.887 | 0     | 0.866 | 0     | 0.866 | 0.866 |
| Thraupidae | <i>Thlypsopsis sordida</i>          | 0.741 | 0.057 | 0 | 0.057 | 0 | 0     | 0.306 | 0     | 0.306 | 0.306 | 0     | 0.350 | 0     | 0     | 0     | 0     | 0.350 | 0     | 0     | 0     |
| Thraupidae | <i>Thraupis bonariensis</i>         | 0     | 0.002 | 0 | 0     | 0 | 0.002 | 0.002 | 0     | 0.002 | 0     | 0.006 | 0.011 | 0     | 0.011 | 0     | 0.183 | 0.135 | 0.135 | 0.135 | 0.135 |
| Thraupidae | <i>Thraupis cyanocephala</i>        | 0     | 0.002 | 0 | 0     | 0 | 0     | 0.007 | 0     | 0     | 0     | 0.794 | 0.005 | 0     | 0.005 | 0     | 0.938 | 0.149 | 0.149 | 0.149 | 0.149 |
| Thraupidae | <i>Thraupis episcopus</i>           | 0.109 | 0.617 | 0 | 0.617 | 0 | 0.267 | 0.190 | 0.190 | 0.190 | 0.190 | 0.458 | 0.762 | 0.762 | 0.762 | 0.762 | 0     | 0.370 | 0     | 0.370 | 0.370 |

|            |                                  |       |       |   |       |   |       |       |       |       |       |       |       |       |       |       |       |       |       |       |       |
|------------|----------------------------------|-------|-------|---|-------|---|-------|-------|-------|-------|-------|-------|-------|-------|-------|-------|-------|-------|-------|-------|-------|
| Thraupidae | <i>Thraupis palmarum</i>         | 0.092 | 0.076 | 0 | 0.076 | 0 | 0.307 | 0.152 | 0.152 | 0.152 | 0.152 | 0.321 | 0.978 | 0.978 | 0.978 | 0.978 | 0     | 0.407 | 0     | 0.407 | 0.407 |
| Thraupidae | <i>Trichothraupis melanops</i>   | 0     | 0.003 | 0 | 0     | 0 | 0.010 | 0.004 | 0     | 0.004 | 0     | 0.010 | 0.336 | 0     | 0.336 | 0     | 0     | 0.751 | 0     | 0.751 | 0.751 |
| Tinamidae  | <i>Crypturellus atrocapillus</i> | 0.449 | 0.012 | 0 | 0.012 | 0 | 0.963 | 0.959 | 0.959 | 0.959 | 0.959 | 0     | 0.984 | 0     | 0.984 | 0.984 | 0     | 0.891 | 0     | 0     | 0     |
| Tinamidae  | <i>Crypturellus bartletti</i>    | 0.007 | 0.010 | 0 | 0.010 | 0 | 0     | 0.037 | 0     | 0.037 | 0.037 | 0     | 0.010 | 0     | 0     | 0     | 0     | 0.005 | 0     | 0     | 0     |
| Tinamidae  | <i>Crypturellus cinereus</i>     | 0.006 | 0.059 | 0 | 0.059 | 0 | 0.001 | 0.972 | 0.972 | 0.972 | 0.972 | 0     | 0.500 | 0     | 0.500 | 0.500 | 0     | 0.007 | 0     | 0     | 0     |
| Tinamidae  | <i>Crypturellus obsoletus</i>    | 0.021 | 0.002 | 0 | 0.002 | 0 | 0.861 | 0.790 | 0.790 | 0.790 | 0.790 | 0.006 | 0.983 | 0.983 | 0.983 | 0.983 | 0.010 | 0.733 | 0.733 | 0.733 | 0.733 |
| Tinamidae  | <i>Crypturellus soui</i>         | 0.273 | 0.866 | 0 | 0.866 | 0 | 0.893 | 0.974 | 0.974 | 0.974 | 0.974 | 0.518 | 0.950 | 0.950 | 0.950 | 0.950 | 0     | 0.818 | 0     | 0.818 | 0.818 |
| Tinamidae  | <i>Crypturellus strigulosus</i>  | 0.081 | 0.004 | 0 | 0.004 | 0 | 0     | 0.705 | 0     | 0.705 | 0.705 | 0     | 0.003 | 0     | 0     | 0     | 0     | 0.001 | 0     | 0     | 0     |
| Tinamidae  | <i>Crypturellus undulatus</i>    | 0.015 | 0.004 | 0 | 0.004 | 0 | 0     | 0.681 | 0     | 0.681 | 0.681 | 0     | 0.024 | 0     | 0     | 0     | 0     | 0.003 | 0     | 0     | 0     |
| Tinamidae  | <i>Crypturellus variegatus</i>   | 0.017 | 0.025 | 0 | 0.025 | 0 | 0     | 0.627 | 0     | 0.627 | 0.627 | 0     | 0.007 | 0     | 0     | 0     | 0     | 0.002 | 0     | 0     | 0     |
| Tinamidae  | <i>Nothocercus nigrocapillus</i> | 0     | 0.003 | 0 | 0     | 0 | 0     | 0.003 | 0     | 0     | 0     | 0     | 0.003 | 0     | 0     | 0     | 0.706 | 0.003 | 0     | 0.003 | 0     |
| Tinamidae  | <i>Tinamus guttatus</i>          | 0.092 | 0.005 | 0 | 0.005 | 0 | 0.002 | 0.996 | 0.996 | 0.996 | 0.996 | 0     | 0.031 | 0     | 0.031 | 0.031 | 0     | 0.024 | 0     | 0     | 0     |
| Tinamidae  | <i>Tinamus major</i>             | 0.668 | 0.572 | 0 | 0.572 | 0 | 0     | 0.305 | 0     | 0.305 | 0.305 | 0     | 0.391 | 0     | 0     | 0     | 0     | 0.037 | 0     | 0     | 0     |
| Tinamidae  | <i>Tinamus tao</i>               | 0.905 | 0.002 | 0 | 0.002 | 0 | 0.875 | 0.983 | 0.983 | 0.983 | 0.983 | 0     | 0.987 | 0     | 0.987 | 0.987 | 0     | 0.948 | 0     | 0     | 0     |
| Trogonidae | <i>Pharomachrus antisianus</i>   | 0     | 0.050 | 0 | 0     | 0 | 0.993 | 0.022 | 0     | 0.022 | 0     | 0.803 | 0.513 | 0     | 0.513 | 0     | 0.936 | 0.934 | 0.934 | 0.934 | 0.934 |
| Trogonidae | <i>Pharomachrus auriceps</i>     | 0     | 0.002 | 0 | 0     | 0 | 0     | 0.002 | 0     | 0     | 0     | 0.931 | 0.147 | 0     | 0.147 | 0     | 0.989 | 0.647 | 0.647 | 0.647 | 0.647 |
| Trogonidae | <i>Pharomachrus pavoninus</i>    | 0.918 | 0.395 | 0 | 0.395 | 0 | 0.132 | 0.998 | 0.998 | 0.998 | 0.998 | 0     | 0.225 | 0     | 0.225 | 0.225 | 0     | 0.016 | 0     | 0     | 0     |
| Trogonidae | <i>Trogon collaris</i>           | 0.004 | 0.138 | 0 | 0.138 | 0 | 0.965 | 0.616 | 0.616 | 0.616 | 0.616 | 0     | 0.993 | 0     | 0.993 | 0.993 | 0     | 0.982 | 0     | 0.982 | 0.982 |
| Trogonidae | <i>Trogon curucui</i>            | 0.058 | 0.003 | 0 | 0.003 | 0 | 0.181 | 0.983 | 0.983 | 0.983 | 0.983 | 0.004 | 0.379 | 0.379 | 0.379 | 0.379 | 0     | 0.122 | 0     | 0.122 | 0.122 |
| Trogonidae | <i>Trogon melanurus</i>          | 0.007 | 0.052 | 0 | 0.052 | 0 | 0.004 | 0.984 | 0.984 | 0.984 | 0.984 | 0     | 0.004 | 0     | 0.004 | 0.004 | 0     | 0.004 | 0     | 0     | 0     |
| Trogonidae | <i>Trogon personatus</i>         | 0     | 0.011 | 0 | 0     | 0 | 0     | 0.221 | 0     | 0     | 0     | 0.712 | 0.166 | 0     | 0.166 | 0     | 0.908 | 0.433 | 0.433 | 0.433 | 0.433 |
| Trogonidae | <i>Trogon violaceus</i>          | 0.694 | 0.945 | 0 | 0.945 | 0 | 0     | 0.717 | 0     | 0.717 | 0.717 | 0     | 0.727 | 0     | 0     | 0     | 0     | 0.250 | 0     | 0     | 0     |
| Trogonidae | <i>Trogon viridis</i>            | 0.243 | 0.106 | 0 | 0.106 | 0 | 0     | 0.957 | 0     | 0.957 | 0.957 | 0     | 0.961 | 0     | 0     | 0     | 0     | 0.256 | 0     | 0     | 0     |
| Turdidae   | <i>Catharus fuscater</i>         | 0     | 0.008 | 0 | 0     | 0 | 0     | 0.005 | 0     | 0     | 0     | 0.978 | 0.095 | 0     | 0.095 | 0     | 0.549 | 0.181 | 0     | 0.181 | 0     |
| Turdidae   | <i>Entomodestes leucotis</i>     | 0     | 0.012 | 0 | 0     | 0 | 0     | 0.039 | 0     | 0     | 0     | 0.473 | 0.645 | 0     | 0.645 | 0     | 0.444 | 0.463 | 0.463 | 0.463 | 0.463 |
| Turdidae   | <i>Myadestes ralloides</i>       | 0     | 0.002 | 0 | 0     | 0 | 0.990 | 0.004 | 0     | 0.004 | 0     | 0.940 | 0.922 | 0.922 | 0.922 | 0.922 | 0.961 | 0.928 | 0.928 | 0.928 | 0.928 |
| Turdidae   | <i>Turdus albicollis</i>         | 0.068 | 0.016 | 0 | 0.016 | 0 | 0     | 0.921 | 0     | 0.921 | 0.921 | 0     | 0.948 | 0     | 0     | 0     | 0     | 0.049 | 0     | 0     | 0     |
| Turdidae   | <i>Turdus chiguanco</i>          | 0     | 0.001 | 0 | 0     | 0 | 0     | 0.001 | 0     | 0     | 0     | 0.001 | 0.002 | 0     | 0.002 | 0     | 0.001 | 0.004 | 0.004 | 0.004 | 0.004 |
| Turdidae   | <i>Turdus fuscater</i>           | 0     | 0.004 | 0 | 0     | 0 | 0     | 0.051 | 0     | 0     | 0     | 0     | 0.185 | 0     | 0     | 0     | 0     | 0.065 | 0     | 0     | 0     |
| Turdidae   | <i>Turdus hauxwelli</i>          | 0.037 | 0.038 | 0 | 0.038 | 0 | 0.125 | 0.603 | 0.603 | 0.603 | 0.603 | 0     | 0.069 | 0     | 0.069 | 0.069 | 0     | 0.057 | 0     | 0.057 | 0.057 |
| Turdidae   | <i>Turdus ignobilis</i>          | 0.332 | 0.562 | 0 | 0.562 | 0 | 0.985 | 0.475 | 0.475 | 0.475 | 0.475 | 0.052 | 0.362 | 0.362 | 0.362 | 0.362 | 0     | 0.920 | 0     | 0.920 | 0.920 |
| Turdidae   | <i>Turdus leucops</i>            | 0     | 0.037 | 0 | 0     | 0 | 0.919 | 0.360 | 0     | 0.360 | 0     | 0.753 | 0.640 | 0.640 | 0.640 | 0.640 | 0.902 | 0.632 | 0.632 | 0.632 | 0.632 |
| Turdidae   | <i>Turdus nigriceps</i>          | 0.592 | 0.002 | 0 | 0.002 | 0 | 0.873 | 0.700 | 0.700 | 0.700 | 0.700 | 0.116 | 0.969 | 0.969 | 0.969 | 0.969 | 0     | 0.652 | 0     | 0.652 | 0.652 |
| Turdidae   | <i>Turdus serranus</i>           | 0     | 0.005 | 0 | 0     | 0 | 0     | 0.070 | 0     | 0     | 0     | 0.173 | 0.242 | 0     | 0.242 | 0     | 0.986 | 0.303 | 0.303 | 0.303 | 0.303 |
| Tyrannidae | <i>Elaenia albiceps</i>          | 0.042 | 0.003 | 0 | 0.003 | 0 | 0.005 | 0.041 | 0     | 0.041 | 0     | 0.004 | 0.007 | 0.007 | 0.007 | 0.007 | 0.722 | 0.078 | 0.078 | 0.078 | 0.078 |
| Tyrannidae | <i>Elaenia flavogaster</i>       | 0.010 | 0.483 | 0 | 0.483 | 0 | 0     | 0.234 | 0     | 0.234 | 0.234 | 0     | 0.988 | 0     | 0     | 0     | 0     | 0.805 | 0     | 0     | 0     |
| Tyrannidae | <i>Elaenia gigas</i>             | 0.992 | 0.300 | 0 | 0.300 | 0 | 0.991 | 0.993 | 0.993 | 0.993 | 0.993 | 0.364 | 0.989 | 0.989 | 0.989 | 0.989 | 0     | 0.936 | 0     | 0.936 | 0.936 |
| Tyrannidae | <i>Elaenia obscura</i>           | 0     | 0.017 | 0 | 0     | 0 | 0     | 0.017 | 0     | 0     | 0     | 0     | 0.039 | 0     | 0     | 0     | 0.298 | 0.067 | 0     | 0.067 | 0     |
| Tyrannidae | <i>Elaenia pallatangae</i>       | 0     | 0.041 | 0 | 0     | 0 | 0     | 0.005 | 0     | 0     | 0     | 0.951 | 0.358 | 0     | 0.358 | 0     | 0.994 | 0.534 | 0.534 | 0.534 | 0.534 |
| Tyrannidae | <i>Lophotriccus pileatus</i>     | 0     | 0.006 | 0 | 0     | 0 | 0.948 | 0.289 | 0     | 0.289 | 0     | 0.988 | 0.978 | 0.978 | 0.978 | 0.978 | 0     | 0.934 | 0     | 0.934 | 0.934 |
| Tyrannidae | <i>Mionectes macconnelli</i>     | 0.003 | 0.013 | 0 | 0.013 | 0 | 0.499 | 0.992 | 0.992 | 0.992 | 0.992 | 0     | 0.938 | 0     | 0.938 | 0.938 | 0     | 0.228 | 0     | 0     | 0     |
| Tyrannidae | <i>Mionectes oleagineus</i>      | 0.335 | 0.770 | 0 | 0.770 | 0 | 0.958 | 0.994 | 0.994 | 0.994 | 0.994 | 0     | 0.970 | 0     | 0.970 | 0.970 | 0     | 0.598 | 0     | 0     | 0     |
| Tyrannidae | <i>Mionectes olivaceus</i>       | 0.547 | 0.041 | 0 | 0.041 | 0 | 0.996 | 0.859 | 0.859 | 0.859 | 0.859 | 0.743 | 0.997 | 0.997 | 0.997 | 0.997 | 0     | 0.893 | 0     | 0.893 | 0.893 |
| Tyrannidae | <i>Mionectes striatcollis</i>    | 0     | 0.004 | 0 | 0     | 0 | 0.325 | 0.520 | 0     | 0.520 | 0     | 0.263 | 0.337 | 0.337 | 0.337 | 0.337 | 0.994 | 0.919 | 0.919 | 0.919 | 0.919 |
| Tyrannidae | <i>Zimmerius bolivianus</i>      | 0     | 0.003 | 0 | 0     | 0 | 0.956 | 0.005 | 0     | 0.005 | 0     | 0.737 | 0.972 | 0     | 0.972 | 0     | 0.385 | 0.733 | 0.733 | 0.733 | 0.733 |
| Tyrannidae | <i>Zimmerius gracilipes</i>      | 0.036 | 0.087 | 0 | 0.087 | 0 | 0     | 0.969 | 0     | 0.969 | 0.969 | 0     | 0.222 | 0     | 0     | 0     | 0     | 0.059 | 0     | 0     | 0     |

**Table S4. Continued.**

|              |                                    | 2500 m  |                 |             |           |       | 3000 m  |                 |             |           |       | 3500 m  |                 |             |           |       |
|--------------|------------------------------------|---------|-----------------|-------------|-----------|-------|---------|-----------------|-------------|-----------|-------|---------|-----------------|-------------|-----------|-------|
| Family       | Bird species                       | current | no range change | contraction | expansion | shift | current | no range change | contraction | expansion | shift | current | no range change | contraction | expansion | shift |
| Cardinalidae | <i>Cyanocompsa cyanoides</i>       | 0       | 0.577           | 0           | 0         | 0     | 0       | 0.006           | 0           | 0         | 0     | 0       | 0.003           | 0           | 0         | 0     |
| Cardinalidae | <i>Pheucticus aureoventris</i>     | 0.007   | 0.008           | 0.008       | 0.008     | 0.008 | 0.043   | 0.063           | 0.063       | 0.063     | 0.063 | 0       | 0.004           | 0           | 0.004     | 0.004 |
| Cardinalidae | <i>Pheucticus chrysogaster</i>     | 0.004   | 0.244           | 0.244       | 0.244     | 0.244 | 0.004   | 0.605           | 0.605       | 0.605     | 0.605 | 0.010   | 0.004           | 0.004       | 0.004     | 0.004 |
| Cardinalidae | <i>Saltator aurantiirostris</i>    | 0       | 0.002           | 0           | 0         | 0     | 0.002   | 0.002           | 0           | 0.002     | 0     | 0.003   | 0.004           | 0.004       | 0.004     | 0.004 |
| Cardinalidae | <i>Saltator coerulescens</i>       | 0       | 0.166           | 0           | 0         | 0     | 0       | 0.004           | 0           | 0         | 0     | 0       | 0.004           | 0           | 0         | 0     |
| Cardinalidae | <i>Saltator grossus</i>            | 0       | 0.016           | 0           | 0         | 0     | 0       | 0.065           | 0           | 0         | 0     | 0       | 0.003           | 0           | 0         | 0     |
| Cardinalidae | <i>Saltator maximus</i>            | 0.007   | 0.705           | 0.705       | 0.705     | 0.705 | 0       | 0.039           | 0           | 0.039     | 0.039 | 0       | 0.007           | 0           | 0         | 0     |
| Columbidae   | <i>Geotrygon montana</i>           | 0       | 0.267           | 0           | 0         | 0     | 0       | 0.002           | 0           | 0         | 0     | 0       | 0.005           | 0           | 0         | 0     |
| Columbidae   | <i>Patagioenas cayennensis</i>     | 0       | 0.737           | 0           | 0         | 0     | 0       | 0.100           | 0           | 0         | 0     | 0       | 0.004           | 0           | 0         | 0     |
| Columbidae   | <i>Patagioenas fasciata</i>        | 0.969   | 0.899           | 0.899       | 0.899     | 0.899 | 0.090   | 0.457           | 0.457       | 0.457     | 0.457 | 0.005   | 0.004           | 0.004       | 0.004     | 0.004 |
| Columbidae   | <i>Patagioenas plumbea</i>         | 0       | 0.838           | 0           | 0.838     | 0.838 | 0       | 0.408           | 0           | 0         | 0     | 0       | 0.031           | 0           | 0         | 0     |
| Columbidae   | <i>Patagioenas subvinacea</i>      | 0       | 0.964           | 0           | 0         | 0     | 0       | 0.100           | 0           | 0         | 0     | 0       | 0.007           | 0           | 0         | 0     |
| Corvidae     | <i>Cyanocorax cyanomelas</i>       | 0       | 0.003           | 0           | 0         | 0     | 0       | 0.003           | 0           | 0         | 0     | 0       | 0.003           | 0           | 0         | 0     |
| Corvidae     | <i>Cyanocorax violaceus</i>        | 0       | 0.067           | 0           | 0         | 0     | 0       | 0.003           | 0           | 0         | 0     | 0       | 0.003           | 0           | 0         | 0     |
| Corvidae     | <i>Cyanocorax yncas</i>            | 0       | 0.996           | 0           | 0.996     | 0.996 | 0       | 0.552           | 0           | 0         | 0     | 0       | 0.004           | 0           | 0         | 0     |
| Cotingidae   | <i>Ampelioides tschudii</i>        | 0       | 0.457           | 0           | 0         | 0     | 0       | 0.444           | 0           | 0         | 0     | 0       | 0.013           | 0           | 0         | 0     |
| Cotingidae   | <i>Ampelion rubrocristatus</i>     | 0.903   | 0.255           | 0           | 0.255     | 0     | 0.015   | 0.453           | 0           | 0.453     | 0     | 0       | 0.119           | 0           | 0.119     | 0.119 |
| Cotingidae   | <i>Ampelion rufaxilla</i>          | 0.856   | 0.933           | 0.933       | 0.933     | 0.933 | 0       | 0.912           | 0           | 0.912     | 0.912 | 0       | 0.082           | 0           | 0         | 0     |
| Cotingidae   | <i>Cephalopterus ornatus</i>       | 0       | 0.215           | 0           | 0         | 0     | 0       | 0.004           | 0           | 0         | 0     | 0       | 0.005           | 0           | 0         | 0     |
| Cotingidae   | <i>Conioptilon mcilhennyi</i>      | 0       | 0.077           | 0           | 0         | 0     | 0       | 0.063           | 0           | 0         | 0     | 0       | 0.088           | 0           | 0         | 0     |
| Cotingidae   | <i>Cotinga cayana</i>              | 0       | 0.037           | 0           | 0         | 0     | 0       | 0.005           | 0           | 0         | 0     | 0       | 0.008           | 0           | 0         | 0     |
| Cotingidae   | <i>Cotinga maynana</i>             | 0       | 0.000           | 0           | 0         | 0     | 0       | 0.000           | 0           | 0         | 0     | 0       | 0.000           | 0           | 0         | 0     |
| Cotingidae   | <i>Gymnoderus foetidus</i>         | 0       | 0.002           | 0           | 0         | 0     | 0       | 0.002           | 0           | 0         | 0     | 0       | 0.002           | 0           | 0         | 0     |
| Cotingidae   | <i>Iodopleura isabellae</i>        | 0       | 0.002           | 0           | 0         | 0     | 0       | 0.002           | 0           | 0         | 0     | 0       | 0.001           | 0           | 0         | 0     |
| Cotingidae   | <i>Laniocera hypopyrra</i>         | 0       | 0.015           | 0           | 0         | 0     | 0       | 0.015           | 0           | 0         | 0     | 0       | 0.015           | 0           | 0         | 0     |
| Cotingidae   | <i>Lipaugus vociferans</i>         | 0       | 0.002           | 0           | 0         | 0     | 0       | 0.002           | 0           | 0         | 0     | 0       | 0.003           | 0           | 0         | 0     |
| Cotingidae   | <i>Oxyruncus cristatus</i>         | 0       | 0.754           | 0           | 0         | 0     | 0       | 0.886           | 0           | 0         | 0     | 0       | 0.019           | 0           | 0         | 0     |
| Cotingidae   | <i>Pipreola arcuata</i>            | 0.612   | 0.999           | 0.999       | 0.999     | 0.999 | 0.356   | 0.965           | 0.965       | 0.965     | 0.965 | 0.189   | 0.193           | 0.193       | 0.193     | 0.193 |
| Cotingidae   | <i>Pipreola frontalis</i>          | 0       | 0.770           | 0           | 0         | 0     | 0       | 0.255           | 0           | 0         | 0     | 0       | 0.023           | 0           | 0         | 0     |
| Cotingidae   | <i>Pipreola intermedia</i>         | 0.095   | 0.051           | 0.051       | 0.051     | 0.051 | 0.302   | 0.988           | 0.988       | 0.988     | 0.988 | 0       | 0.124           | 0           | 0.124     | 0.124 |
| Cotingidae   | <i>Porphyrolaema porphyrolaema</i> | 0       | 0.002           | 0           | 0         | 0     | 0       | 0.000           | 0           | 0         | 0     | 0       | 0.000           | 0           | 0         | 0     |
| Cotingidae   | <i>Querula purpurata</i>           | 0       | 0.004           | 0           | 0         | 0     | 0       | 0.003           | 0           | 0         | 0     | 0       | 0.001           | 0           | 0         | 0     |
| Cotingidae   | <i>Rupicola peruvianus</i>         | 0.733   | 0.998           | 0.998       | 0.998     | 0.998 | 0       | 0.087           | 0           | 0.087     | 0.087 | 0       | 0.003           | 0           | 0         | 0     |
| Cotingidae   | <i>Snowornis subalaris</i>         | 0       | 0.864           | 0           | 0         | 0     | 0       | 0.010           | 0           | 0         | 0     | 0       | 0.010           | 0           | 0         | 0     |
| Cotingidae   | <i>Tityra cayana</i>               | 0       | 0.033           | 0           | 0         | 0     | 0       | 0.011           | 0           | 0         | 0     | 0       | 0.002           | 0           | 0         | 0     |
| Cotingidae   | <i>Tityra inquisitor</i>           | 0       | 0.101           | 0           | 0         | 0     | 0       | 0.114           | 0           | 0         | 0     | 0       | 0.003           | 0           | 0         | 0     |
| Cotingidae   | <i>Tityra semifasciata</i>         | 0       | 0.835           | 0           | 0         | 0     | 0       | 0.066           | 0           | 0         | 0     | 0       | 0.007           | 0           | 0         | 0     |
| Cracidae     | <i>Aburria aburri</i>              | 0       | 0.979           | 0           | 0         | 0     | 0       | 0.125           | 0           | 0         | 0     | 0       | 0.009           | 0           | 0         | 0     |
| Cracidae     | <i>Mitu tuberosum</i>              | 0       | 0.001           | 0           | 0         | 0     | 0       | 0.001           | 0           | 0         | 0     | 0       | 0.001           | 0           | 0         | 0     |
| Cracidae     | <i>Ortalis guttata</i>             | 0       | 0.772           | 0           | 0         | 0     | 0       | 0.006           | 0           | 0         | 0     | 0       | 0.003           | 0           | 0         | 0     |
| Cracidae     | <i>Penelope jacquacu</i>           | 0       | 0.003           | 0           | 0         | 0     | 0       | 0.004           | 0           | 0         | 0     | 0       | 0.003           | 0           | 0         | 0     |

|                |                                    |       |       |       |       |       |       |       |       |       |       |       |       |       |       |       |
|----------------|------------------------------------|-------|-------|-------|-------|-------|-------|-------|-------|-------|-------|-------|-------|-------|-------|-------|
| Cracidae       | <i>Penelope montagnii</i>          | 0.624 | 0.982 | 0.982 | 0.982 | 0.982 | 0.151 | 0.906 | 0.906 | 0.906 | 0.906 | 0     | 0.007 | 0     | 0.007 | 0.007 |
| Cracidae       | <i>Pipile cumanensis</i>           | 0     | 0.005 | 0     | 0     | 0     | 0     | 0.005 | 0     | 0     | 0     | 0     | 0.006 | 0     | 0     | 0     |
| Icteridae      | <i>Cacicus cela</i>                | 0     | 0.178 | 0     | 0     | 0     | 0     | 0.006 | 0     | 0     | 0     | 0     | 0.005 | 0     | 0     | 0     |
| Icteridae      | <i>Cacicus chrysonotus</i>         | 0.874 | 0.996 | 0     | 0.996 | 0     | 0.295 | 0.084 | 0.084 | 0.084 | 0.084 | 0     | 0.004 | 0     | 0.004 | 0.004 |
| Icteridae      | <i>Cacicus haemorrhous</i>         | 0     | 0.016 | 0     | 0     | 0     | 0     | 0.035 | 0     | 0     | 0     | 0     | 0.003 | 0     | 0     | 0     |
| Icteridae      | <i>Clypicerus oseryi</i>           | 0     | 0.148 | 0     | 0     | 0     | 0     | 0.002 | 0     | 0     | 0     | 0     | 0.005 | 0     | 0     | 0     |
| Icteridae      | <i>Icterus icterus</i>             | 0     | 0.031 | 0     | 0     | 0     | 0     | 0.025 | 0     | 0     | 0     | 0     | 0.024 | 0     | 0     | 0     |
| Icteridae      | <i>Molothrus oryzivorus</i>        | 0     | 0.607 | 0     | 0     | 0     | 0     | 0.144 | 0     | 0     | 0     | 0     | 0.008 | 0     | 0     | 0     |
| Icteridae      | <i>Psarocolius angustifrons</i>    | 0     | 0.920 | 0     | 0.920 | 0.920 | 0     | 0.015 | 0     | 0     | 0     | 0     | 0.007 | 0     | 0     | 0     |
| Icteridae      | <i>Psarocolius atrovirens</i>      | 0.009 | 0.222 | 0.222 | 0.222 | 0.222 | 0     | 0.099 | 0     | 0.099 | 0.099 | 0     | 0.001 | 0     | 0     | 0     |
| Icteridae      | <i>Psarocolius bifasciatus</i>     | 0     | 0.006 | 0     | 0     | 0     | 0     | 0.002 | 0     | 0     | 0     | 0     | 0.002 | 0     | 0     | 0     |
| Icteridae      | <i>Psarocolius decumanus</i>       | 0     | 0.050 | 0     | 0     | 0     | 0     | 0.006 | 0     | 0     | 0     | 0     | 0.004 | 0     | 0     | 0     |
| Odontophoridae | <i>Odontophorus balliviani</i>     | 0.475 | 0.406 | 0.406 | 0.406 | 0.406 | 0.411 | 0.658 | 0.658 | 0.658 | 0.658 | 0     | 0.014 | 0     | 0.014 | 0.014 |
| Odontophoridae | <i>Odontophorus speciosus</i>      | 0     | 0.537 | 0     | 0.537 | 0.537 | 0     | 0.074 | 0     | 0     | 0     | 0     | 0.009 | 0     | 0     | 0     |
| Odontophoridae | <i>Odontophorus stellatus</i>      | 0     | 0.039 | 0     | 0     | 0     | 0     | 0.001 | 0     | 0     | 0     | 0     | 0.001 | 0     | 0     | 0     |
| Picidae        | <i>Celeus elegans</i>              | 0     | 0.001 | 0     | 0     | 0     | 0     | 0.001 | 0     | 0     | 0     | 0     | 0.001 | 0     | 0     | 0     |
| Picidae        | <i>Celeus flavus</i>               | 0     | 0.008 | 0     | 0     | 0     | 0     | 0.009 | 0     | 0     | 0     | 0     | 0.008 | 0     | 0     | 0     |
| Picidae        | <i>Celeus grammicus</i>            | 0     | 0.007 | 0     | 0     | 0     | 0     | 0.006 | 0     | 0     | 0     | 0     | 0.014 | 0     | 0     | 0     |
| Picidae        | <i>Celeus spectabilis</i>          | 0     | 0.211 | 0     | 0     | 0     | 0     | 0.000 | 0     | 0     | 0     | 0     | 0.001 | 0     | 0     | 0     |
| Picidae        | <i>Celeus torquatus</i>            | 0     | 0.012 | 0     | 0     | 0     | 0     | 0.009 | 0     | 0     | 0     | 0     | 0.011 | 0     | 0     | 0     |
| Picidae        | <i>Colaptes rubiginosus</i>        | 0     | 0.973 | 0     | 0.973 | 0.973 | 0     | 0.365 | 0     | 0     | 0     | 0     | 0.005 | 0     | 0     | 0     |
| Pipridae       | <i>Chiroxiphia boliviana</i>       | 0     | 0.005 | 0     | 0.005 | 0.005 | 0     | 0.153 | 0     | 0     | 0     | 0     | 0.005 | 0     | 0     | 0     |
| Pipridae       | <i>Chiroxiphia pareola</i>         | 0     | 0.029 | 0     | 0     | 0     | 0     | 0.032 | 0     | 0     | 0     | 0     | 0.027 | 0     | 0     | 0     |
| Pipridae       | <i>Lepidothrix coeruleocapilla</i> | 0     | 0.004 | 0     | 0     | 0     | 0     | 0.004 | 0     | 0     | 0     | 0     | 0.003 | 0     | 0     | 0     |
| Pipridae       | <i>Lepidothrix coronata</i>        | 0     | 0.013 | 0     | 0     | 0     | 0     | 0.011 | 0     | 0     | 0     | 0     | 0.012 | 0     | 0     | 0     |
| Pipridae       | <i>Machaeropterus pyrocephalus</i> | 0     | 0.004 | 0     | 0     | 0     | 0     | 0.004 | 0     | 0     | 0     | 0     | 0.004 | 0     | 0     | 0     |
| Pipridae       | <i>Manacus manacus</i>             | 0     | 0.905 | 0     | 0     | 0     | 0     | 0.013 | 0     | 0     | 0     | 0     | 0.001 | 0     | 0     | 0     |
| Pipridae       | <i>Neopelma sulphureiventer</i>    | 0     | 0.031 | 0     | 0     | 0     | 0     | 0.042 | 0     | 0     | 0     | 0     | 0.056 | 0     | 0     | 0     |
| Pipridae       | <i>Pipra chloromeros</i>           | 0     | 0.007 | 0     | 0     | 0     | 0     | 0.006 | 0     | 0     | 0     | 0     | 0.006 | 0     | 0     | 0     |
| Pipridae       | <i>Pipra fasciicauda</i>           | 0     | 0.003 | 0     | 0     | 0     | 0     | 0.003 | 0     | 0     | 0     | 0     | 0.003 | 0     | 0     | 0     |
| Pipridae       | <i>Xenopipo holochlora</i>         | 0     | 0.022 | 0     | 0     | 0     | 0     | 0.379 | 0     | 0     | 0     | 0     | 0.001 | 0     | 0     | 0     |
| Pipridae       | <i>Xenopipo unicolor</i>           | 0     | 0.247 | 0     | 0     | 0     | 0     | 0.075 | 0     | 0     | 0     | 0     | 0.003 | 0     | 0     | 0     |
| Psittacidae    | <i>Amazona farinosa</i>            | 0     | 0.366 | 0     | 0     | 0     | 0     | 0.009 | 0     | 0     | 0     | 0     | 0.010 | 0     | 0     | 0     |
| Psittacidae    | <i>Amazona mercenaria</i>          | 0.981 | 0.980 | 0.980 | 0.980 | 0.980 | 0.948 | 0.809 | 0.809 | 0.809 | 0.809 | 0     | 0.843 | 0     | 0.843 | 0.843 |
| Psittacidae    | <i>Amazona ochrocephala</i>        | 0     | 0.005 | 0     | 0     | 0     | 0     | 0.005 | 0     | 0     | 0     | 0     | 0.008 | 0     | 0     | 0     |
| Psittacidae    | <i>Ara ararauna</i>                | 0     | 0.005 | 0     | 0     | 0     | 0     | 0.004 | 0     | 0     | 0     | 0     | 0.005 | 0     | 0     | 0     |
| Psittacidae    | <i>Ara chloropterus</i>            | 0     | 0.003 | 0     | 0     | 0     | 0     | 0.004 | 0     | 0     | 0     | 0     | 0.003 | 0     | 0     | 0     |
| Psittacidae    | <i>Ara macao</i>                   | 0     | 0.003 | 0     | 0     | 0     | 0     | 0.003 | 0     | 0     | 0     | 0     | 0.003 | 0     | 0     | 0     |
| Psittacidae    | <i>Ara militaris</i>               | 0     | 0.619 | 0     | 0     | 0     | 0     | 0.006 | 0     | 0     | 0     | 0     | 0.001 | 0     | 0     | 0     |
| Psittacidae    | <i>Ara severus</i>                 | 0     | 0.020 | 0     | 0     | 0     | 0     | 0.005 | 0     | 0     | 0     | 0     | 0.010 | 0     | 0     | 0     |
| Psittacidae    | <i>Aratinga leucophthalma</i>      | 0     | 0.013 | 0     | 0     | 0     | 0     | 0.133 | 0     | 0     | 0     | 0     | 0.004 | 0     | 0     | 0     |
| Psittacidae    | <i>Aratinga mitrata</i>            | 0.002 | 0.001 | 0.001 | 0.001 | 0.001 | 0.002 | 0.005 | 0.005 | 0.005 | 0.005 | 0     | 0.001 | 0     | 0.001 | 0.001 |
| Psittacidae    | <i>Aratinga weddellii</i>          | 0     | 0.002 | 0     | 0     | 0     | 0     | 0.002 | 0     | 0     | 0     | 0     | 0.002 | 0     | 0     | 0     |
| Psittacidae    | <i>Bolborhynchus lineola</i>       | 0.715 | 0.803 | 0.803 | 0.803 | 0.803 | 0.195 | 0.564 | 0.564 | 0.564 | 0.564 | 0     | 0.167 | 0     | 0.167 | 0.167 |
| Psittacidae    | <i>Bolborhynchus orbygniesius</i>  | 0.049 | 0.112 | 0     | 0.112 | 0     | 0.029 | 0.058 | 0     | 0.058 | 0     | 0.012 | 0.016 | 0.016 | 0.016 | 0.016 |
| Psittacidae    | <i>Brotogeris cyanoptera</i>       | 0     | 0.002 | 0     | 0     | 0     | 0     | 0.002 | 0     | 0     | 0     | 0     | 0.002 | 0     | 0     | 0     |
| Psittacidae    | <i>Brotogeris sanctithomae</i>     | 0     | 0.031 | 0     | 0     | 0     | 0     | 0.002 | 0     | 0     | 0     | 0     | 0.028 | 0     | 0     | 0     |
| Psittacidae    | <i>Forpus modestus</i>             | 0     | 0.017 | 0     | 0     | 0     | 0     | 0.017 | 0     | 0     | 0     | 0     | 0.017 | 0     | 0     | 0     |
| Psittacidae    | <i>Nannopsittaca dachilleae</i>    | 0     | 0.001 | 0     | 0     | 0     | 0     | 0.000 | 0     | 0     | 0     | 0     | 0.000 | 0     | 0     | 0     |
| Psittacidae    | <i>Orthopsittaca manilata</i>      | 0     | 0.003 | 0     | 0     | 0     | 0     | 0.003 | 0     | 0     | 0     | 0     | 0.010 | 0     | 0     | 0     |

|                 |                                       |       |       |       |       |       |       |       |       |       |       |       |       |       |       |       |
|-----------------|---------------------------------------|-------|-------|-------|-------|-------|-------|-------|-------|-------|-------|-------|-------|-------|-------|-------|
| Psittacidae     | <i>Pionites leucogaster</i>           | 0     | 0.000 | 0     | 0     | 0     | 0     | 0.000 | 0     | 0     | 0     | 0     | 0.000 | 0     | 0     | 0     |
| Psittacidae     | <i>Pionus menstruus</i>               | 0     | 0.867 | 0     | 0.867 | 0.867 | 0     | 0.004 | 0     | 0     | 0     | 0     | 0.004 | 0     | 0     | 0     |
| Psittacidae     | <i>Pionus tumultuosus</i>             | 0.893 | 0.993 | 0.993 | 0.993 | 0.993 | 0.297 | 0.991 | 0.991 | 0.991 | 0.991 | 0     | 0.212 | 0     | 0.212 | 0.212 |
| Psittacidae     | <i>Primolius couloni</i>              | 0     | 0.005 | 0     | 0     | 0     | 0     | 0.012 | 0     | 0     | 0     | 0     | 0.006 | 0     | 0     | 0     |
| Psittacidae     | <i>Pyrilia barrabandi</i>             | 0     | 0.006 | 0     | 0     | 0     | 0     | 0.006 | 0     | 0     | 0     | 0     | 0.006 | 0     | 0     | 0     |
| Psittacidae     | <i>Pyrrhura roseifrons</i>            | 0     | 0.005 | 0     | 0     | 0     | 0     | 0.005 | 0     | 0     | 0     | 0     | 0.005 | 0     | 0     | 0     |
| Psittacidae     | <i>Pyrrhura rupicola</i>              | 0     | 0.572 | 0     | 0     | 0     | 0     | 0.018 | 0     | 0     | 0     | 0     | 0.018 | 0     | 0     | 0     |
| Psittacidae     | <i>Touit huetii</i>                   | 0     | 0.001 | 0     | 0     | 0     | 0     | 0.000 | 0     | 0     | 0     | 0     | 0.000 | 0     | 0     | 0     |
| Psophiidae      | <i>Psophia leucoptera</i>             | 0     | 0.021 | 0     | 0     | 0     | 0     | 0.002 | 0     | 0     | 0     | 0     | 0.012 | 0     | 0     | 0     |
| Ramphastidae    | <i>Andigena hypoglauca</i>            | 0.230 | 0.026 | 0.026 | 0.026 | 0.026 | 0.767 | 0.688 | 0.688 | 0.688 | 0.688 | 0.814 | 0.147 | 0.147 | 0.147 | 0.147 |
| Ramphastidae    | <i>Aulacorhynchus coeruleicinctis</i> | 0.043 | 0.520 | 0.520 | 0.520 | 0.520 | 0     | 0.900 | 0     | 0.900 | 0.900 | 0     | 0.010 | 0     | 0     | 0     |
| Ramphastidae    | <i>Aulacorhynchus derbianus</i>       | 0     | 0.451 | 0     | 0     | 0     | 0     | 0.657 | 0     | 0     | 0     | 0     | 0.019 | 0     | 0     | 0     |
| Ramphastidae    | <i>Aulacorhynchus prasinus</i>        | 0     | 0.956 | 0     | 0     | 0     | 0     | 0.419 | 0     | 0     | 0     | 0     | 0.240 | 0     | 0     | 0     |
| Ramphastidae    | <i>Capito auratus</i>                 | 0     | 0.008 | 0     | 0     | 0     | 0     | 0.001 | 0     | 0     | 0     | 0     | 0.002 | 0     | 0     | 0     |
| Ramphastidae    | <i>Eubucco richardsoni</i>            | 0     | 0.002 | 0     | 0     | 0     | 0     | 0.003 | 0     | 0     | 0     | 0     | 0.002 | 0     | 0     | 0     |
| Ramphastidae    | <i>Eubucco tucinkae</i>               | 0     | 0.098 | 0     | 0     | 0     | 0     | 0.004 | 0     | 0     | 0     | 0     | 0.005 | 0     | 0     | 0     |
| Ramphastidae    | <i>Eubucco versicolor</i>             | 0     | 0.010 | 0     | 0.010 | 0.010 | 0     | 0.628 | 0     | 0     | 0     | 0     | 0.002 | 0     | 0     | 0     |
| Ramphastidae    | <i>Pteroglossus azara</i>             | 0     | 0.002 | 0     | 0     | 0     | 0     | 0.001 | 0     | 0     | 0     | 0     | 0.002 | 0     | 0     | 0     |
| Ramphastidae    | <i>Pteroglossus beauharnaesii</i>     | 0     | 0.004 | 0     | 0     | 0     | 0     | 0.003 | 0     | 0     | 0     | 0     | 0.003 | 0     | 0     | 0     |
| Ramphastidae    | <i>Pteroglossus castanotis</i>        | 0     | 0.005 | 0     | 0     | 0     | 0     | 0.016 | 0     | 0     | 0     | 0     | 0.004 | 0     | 0     | 0     |
| Ramphastidae    | <i>Pteroglossus inscriptus</i>        | 0     | 0.014 | 0     | 0     | 0     | 0     | 0.014 | 0     | 0     | 0     | 0     | 0.013 | 0     | 0     | 0     |
| Ramphastidae    | <i>Ramphastos tucanus</i>             | 0     | 0.002 | 0     | 0     | 0     | 0     | 0.002 | 0     | 0     | 0     | 0     | 0.002 | 0     | 0     | 0     |
| Ramphastidae    | <i>Ramphastos vitellinus</i>          | 0     | 0.038 | 0     | 0     | 0     | 0     | 0.003 | 0     | 0     | 0     | 0     | 0.003 | 0     | 0     | 0     |
| Ramphastidae    | <i>Selenidera reinwardtii</i>         | 0     | 0.001 | 0     | 0     | 0     | 0     | 0.000 | 0     | 0     | 0     | 0     | 0.000 | 0     | 0     | 0     |
| Steatornithidae | <i>Steatornis caripensis</i>          | 0     | 0.987 | 0     | 0     | 0     | 0     | 0.795 | 0     | 0     | 0     | 0     | 0.795 | 0     | 0     | 0     |
| Thraupidae      | <i>Anisognathus igniventris</i>       | 0     | 0.966 | 0     | 0     | 0     | 0.551 | 0.993 | 0     | 0.993 | 0     | 0.878 | 0.005 | 0.005 | 0.005 | 0.005 |
| Thraupidae      | <i>Anisognathus somptuosus</i>        | 0.130 | 0.894 | 0.894 | 0.894 | 0.894 | 0.051 | 0.400 | 0.400 | 0.400 | 0.400 | 0     | 0.004 | 0     | 0.004 | 0.004 |
| Thraupidae      | <i>Buthraupis montana</i>             | 0.370 | 0.990 | 0     | 0.990 | 0     | 0.040 | 0.807 | 0.807 | 0.807 | 0.807 | 0     | 0.078 | 0     | 0.078 | 0.078 |
| Thraupidae      | <i>Catamblyrhynchus diadema</i>       | 0.921 | 0.942 | 0     | 0.942 | 0     | 0.864 | 0.953 | 0.953 | 0.953 | 0.953 | 0     | 0.571 | 0     | 0.571 | 0.571 |
| Thraupidae      | <i>Chlorochrysa calliparaea</i>       | 0     | 0.996 | 0     | 0.996 | 0.996 | 0     | 0.015 | 0     | 0     | 0     | 0     | 0.005 | 0     | 0     | 0     |
| Thraupidae      | <i>Chlorophanes spiza</i>             | 0     | 0.186 | 0     | 0     | 0     | 0     | 0.004 | 0     | 0     | 0     | 0     | 0.005 | 0     | 0     | 0     |
| Thraupidae      | <i>Chlorophonia cyanea</i>            | 0     | 0.599 | 0     | 0.599 | 0.599 | 0     | 0.811 | 0     | 0     | 0     | 0     | 0.006 | 0     | 0     | 0     |
| Thraupidae      | <i>Chlorornis riefferii</i>           | 0.813 | 0.995 | 0     | 0.995 | 0     | 0.561 | 0.993 | 0.993 | 0.993 | 0.993 | 0     | 0.009 | 0     | 0.009 | 0.009 |
| Thraupidae      | <i>Chlorospingus canigularis</i>      | 0     | 0.995 | 0     | 0     | 0     | 0     | 0.469 | 0     | 0     | 0     | 0     | 0.006 | 0     | 0     | 0     |
| Thraupidae      | <i>Chlorospingus flavigularis</i>     | 0     | 0.995 | 0     | 0.995 | 0.995 | 0     | 0.015 | 0     | 0     | 0     | 0     | 0.003 | 0     | 0     | 0     |
| Thraupidae      | <i>Chlorospingus ophthalmicus</i>     | 0.776 | 0.993 | 0.993 | 0.993 | 0.993 | 0     | 0.406 | 0     | 0.406 | 0.406 | 0     | 0.009 | 0     | 0     | 0     |
| Thraupidae      | <i>Chlorospingus parvirostris</i>     | 0.414 | 0.971 | 0.971 | 0.971 | 0.971 | 0     | 0.762 | 0     | 0.762 | 0.762 | 0     | 0.143 | 0     | 0     | 0     |
| Thraupidae      | <i>Cissopis leverianus</i>            | 0     | 0.829 | 0     | 0     | 0     | 0     | 0.075 | 0     | 0     | 0     | 0     | 0.007 | 0     | 0     | 0     |
| Thraupidae      | <i>Conirostrum cinereum</i>           | 0     | 0.008 | 0     | 0     | 0     | 0.003 | 0.337 | 0     | 0.337 | 0     | 0.014 | 0.003 | 0.003 | 0.003 | 0.003 |
| Thraupidae      | <i>Conirostrum speciosum</i>          | 0     | 0.247 | 0     | 0     | 0     | 0     | 0.093 | 0     | 0     | 0     | 0     | 0.009 | 0     | 0     | 0     |
| Thraupidae      | <i>Cyanerpes caeruleus</i>            | 0     | 0.233 | 0     | 0     | 0     | 0     | 0.002 | 0     | 0     | 0     | 0     | 0.006 | 0     | 0     | 0     |
| Thraupidae      | <i>Cyanerpes cyaneus</i>              | 0     | 0.358 | 0     | 0     | 0     | 0     | 0.001 | 0     | 0     | 0     | 0     | 0.000 | 0     | 0     | 0     |
| Thraupidae      | <i>Dacnis cayana</i>                  | 0     | 0.622 | 0     | 0     | 0     | 0     | 0.070 | 0     | 0     | 0     | 0     | 0.005 | 0     | 0     | 0     |
| Thraupidae      | <i>Dacnis flaviventer</i>             | 0     | 0.086 | 0     | 0     | 0     | 0     | 0.005 | 0     | 0     | 0     | 0     | 0.003 | 0     | 0     | 0     |
| Thraupidae      | <i>Dacnis lineata</i>                 | 0     | 0.731 | 0     | 0     | 0     | 0     | 0.135 | 0     | 0     | 0     | 0     | 0.004 | 0     | 0     | 0     |
| Thraupidae      | <i>Delothraupis castaneiventris</i>   | 0     | 0.004 | 0     | 0.004 | 0     | 0.070 | 0.039 | 0.039 | 0.039 | 0.039 | 0     | 0.003 | 0.003 | 0.003 | 0.003 |
| Thraupidae      | <i>Diglossa brunneiventris</i>        | 0     | 0.002 | 0     | 0     | 0     | 0.003 | 0.001 | 0     | 0.001 | 0     | 0.007 | 0.044 | 0.044 | 0.044 | 0.044 |
| Thraupidae      | <i>Diglossa caeruleascens</i>         | 0.977 | 0.998 | 0.998 | 0.998 | 0.998 | 0     | 0.813 | 0     | 0.813 | 0.813 | 0     | 0.127 | 0     | 0     | 0     |
| Thraupidae      | <i>Diglossa cyanea</i>                | 0.969 | 0.956 | 0.956 | 0.956 | 0.956 | 0.044 | 0.303 | 0.303 | 0.303 | 0.303 | 0.125 | 0.003 | 0.003 | 0.003 | 0.003 |
| Thraupidae      | <i>Diglossa glauca</i>                | 0     | 0.969 | 0     | 0.969 | 0.969 | 0     | 0.077 | 0     | 0     | 0     | 0     | 0.023 | 0     | 0     | 0     |

|            |                                  |       |       |       |       |       |       |       |       |       |       |       |       |       |       |       |
|------------|----------------------------------|-------|-------|-------|-------|-------|-------|-------|-------|-------|-------|-------|-------|-------|-------|-------|
| Thraupidae | <i>Diglossa mystacalis</i>       | 0     | 0.002 | 0     | 0     | 0     | 0.185 | 0.097 | 0     | 0.097 | 0     | 0.033 | 0.003 | 0.003 | 0.003 | 0.003 |
| Thraupidae | <i>Diglossa sitoides</i>         | 0.216 | 0.375 | 0.375 | 0.375 | 0.375 | 0.062 | 0.779 | 0.779 | 0.779 | 0.779 | 0.004 | 0.004 | 0.004 | 0.004 | 0.004 |
| Thraupidae | <i>Dubusia taeniata</i>          | 0.863 | 0.868 | 0.868 | 0.868 | 0.868 | 0.374 | 0.731 | 0.731 | 0.731 | 0.731 | 0     | 0.919 | 0     | 0.919 | 0.919 |
| Thraupidae | <i>Euphonia chlorotica</i>       | 0     | 0.095 | 0     | 0     | 0     | 0     | 0.010 | 0     | 0     | 0     | 0     | 0.004 | 0     | 0     | 0     |
| Thraupidae | <i>Euphonia chrysopasta</i>      | 0     | 0.051 | 0     | 0     | 0     | 0     | 0.017 | 0     | 0     | 0     | 0     | 0.017 | 0     | 0     | 0     |
| Thraupidae | <i>Euphonia laniirostris</i>     | 0     | 0.307 | 0     | 0     | 0     | 0     | 0.135 | 0     | 0     | 0     | 0     | 0.003 | 0     | 0     | 0     |
| Thraupidae | <i>Euphonia mesochrysa</i>       | 0     | 0.860 | 0     | 0     | 0     | 0     | 0.066 | 0     | 0     | 0     | 0     | 0.005 | 0     | 0     | 0     |
| Thraupidae | <i>Euphonia minuta</i>           | 0     | 0.166 | 0     | 0     | 0     | 0     | 0.051 | 0     | 0     | 0     | 0     | 0.037 | 0     | 0     | 0     |
| Thraupidae | <i>Euphonia rufiventris</i>      | 0     | 0.047 | 0     | 0     | 0     | 0     | 0.073 | 0     | 0     | 0     | 0     | 0.028 | 0     | 0     | 0     |
| Thraupidae | <i>Euphonia xanthogaster</i>     | 0     | 0.164 | 0     | 0.164 | 0.164 | 0     | 0.021 | 0     | 0     | 0     | 0     | 0.003 | 0     | 0     | 0     |
| Thraupidae | <i>Iridophanes pulcherrimus</i>  | 0     | 0.999 | 0     | 0     | 0     | 0     | 0.967 | 0     | 0     | 0     | 0     | 0.001 | 0     | 0     | 0     |
| Thraupidae | <i>Iridosornis analis</i>        | 0     | 0.872 | 0     | 0.872 | 0.872 | 0     | 0.132 | 0     | 0     | 0     | 0     | 0.023 | 0     | 0     | 0     |
| Thraupidae | <i>Iridosornis jelskii</i>       | 0.003 | 0.052 | 0     | 0.052 | 0     | 0.195 | 0.195 | 0.195 | 0.195 | 0.195 | 0.003 | 0.005 | 0.005 | 0.005 | 0.005 |
| Thraupidae | <i>Lamprospiza melanoleuca</i>   | 0     | 0.004 | 0     | 0     | 0     | 0     | 0.004 | 0     | 0     | 0     | 0     | 0.004 | 0     | 0     | 0     |
| Thraupidae | <i>Pipraeidea melanonota</i>     | 0.273 | 0.991 | 0.991 | 0.991 | 0.991 | 0.007 | 0.929 | 0.929 | 0.929 | 0.929 | 0     | 0.003 | 0     | 0.003 | 0.003 |
| Thraupidae | <i>Piranga leucoptera</i>        | 0     | 0.725 | 0     | 0     | 0     | 0     | 0.872 | 0     | 0     | 0     | 0     | 0.002 | 0     | 0     | 0     |
| Thraupidae | <i>Ramphocelus carbo</i>         | 0     | 0.608 | 0     | 0     | 0     | 0     | 0.002 | 0     | 0     | 0     | 0     | 0.002 | 0     | 0     | 0     |
| Thraupidae | <i>Ramphocelus nigrogularis</i>  | 0     | 0.003 | 0     | 0     | 0     | 0     | 0.002 | 0     | 0     | 0     | 0     | 0.003 | 0     | 0     | 0     |
| Thraupidae | <i>Schistochlamys melanopsis</i> | 0.010 | 0.040 | 0.040 | 0.040 | 0.040 | 0     | 0.083 | 0     | 0.083 | 0.083 | 0     | 0.010 | 0     | 0     | 0     |
| Thraupidae | <i>Tachyphonus cristatus</i>     | 0     | 0.017 | 0     | 0     | 0     | 0     | 0.005 | 0     | 0     | 0     | 0     | 0.003 | 0     | 0     | 0     |
| Thraupidae | <i>Tachyphonus rufiventer</i>    | 0     | 0.024 | 0     | 0     | 0     | 0     | 0.005 | 0     | 0     | 0     | 0     | 0.003 | 0     | 0     | 0     |
| Thraupidae | <i>Tangara arthus</i>            | 0     | 0.598 | 0     | 0     | 0     | 0     | 0.014 | 0     | 0     | 0     | 0     | 0.003 | 0     | 0     | 0     |
| Thraupidae | <i>Tangara callophrys</i>        | 0     | 0.006 | 0     | 0     | 0     | 0     | 0.007 | 0     | 0     | 0     | 0     | 0.006 | 0     | 0     | 0     |
| Thraupidae | <i>Tangara chilensis</i>         | 0     | 0.580 | 0     | 0     | 0     | 0     | 0.004 | 0     | 0     | 0     | 0     | 0.004 | 0     | 0     | 0     |
| Thraupidae | <i>Tangara chrysotis</i>         | 0     | 0.844 | 0     | 0.844 | 0.844 | 0     | 0.025 | 0     | 0     | 0     | 0     | 0.006 | 0     | 0     | 0     |
| Thraupidae | <i>Tangara cyanicollis</i>       | 0     | 0.991 | 0     | 0.991 | 0.991 | 0     | 0.021 | 0     | 0     | 0     | 0     | 0.003 | 0     | 0     | 0     |
| Thraupidae | <i>Tangara cyanotis</i>          | 0     | 0.889 | 0     | 0.889 | 0.889 | 0     | 0.058 | 0     | 0     | 0     | 0     | 0.010 | 0     | 0     | 0     |
| Thraupidae | <i>Tangara gyrola</i>            | 0     | 0.996 | 0     | 0     | 0     | 0     | 0.150 | 0     | 0     | 0     | 0     | 0.005 | 0     | 0     | 0     |
| Thraupidae | <i>Tangara mexicana</i>          | 0     | 0.008 | 0     | 0     | 0     | 0     | 0.003 | 0     | 0     | 0     | 0     | 0.003 | 0     | 0     | 0     |
| Thraupidae | <i>Tangara nigrocincta</i>       | 0     | 0.137 | 0     | 0     | 0     | 0     | 0.074 | 0     | 0     | 0     | 0     | 0.008 | 0     | 0     | 0     |
| Thraupidae | <i>Tangara nigroviridis</i>      | 0.973 | 0.995 | 0.995 | 0.995 | 0.995 | 0     | 0.059 | 0     | 0.059 | 0.059 | 0     | 0.004 | 0     | 0     | 0     |
| Thraupidae | <i>Tangara parzudakii</i>        | 0     | 0.996 | 0     | 0.996 | 0.996 | 0     | 0.432 | 0     | 0     | 0     | 0     | 0.003 | 0     | 0     | 0     |
| Thraupidae | <i>Tangara punctata</i>          | 0     | 0.586 | 0     | 0.586 | 0.586 | 0     | 0.029 | 0     | 0     | 0     | 0     | 0.014 | 0     | 0     | 0     |
| Thraupidae | <i>Tangara ruficervix</i>        | 0     | 0.990 | 0     | 0.990 | 0.990 | 0     | 0.660 | 0     | 0     | 0     | 0     | 0.005 | 0     | 0     | 0     |
| Thraupidae | <i>Tangara schrankii</i>         | 0     | 0.038 | 0     | 0     | 0     | 0     | 0.002 | 0     | 0     | 0     | 0     | 0.002 | 0     | 0     | 0     |
| Thraupidae | <i>Tangara vassorii</i>          | 0.550 | 0.993 | 0.993 | 0.993 | 0.993 | 0.972 | 0.123 | 0.123 | 0.123 | 0.123 | 0     | 0.006 | 0     | 0.006 | 0.006 |
| Thraupidae | <i>Tangara velia</i>             | 0     | 0.003 | 0     | 0     | 0     | 0     | 0.003 | 0     | 0     | 0     | 0     | 0.003 | 0     | 0     | 0     |
| Thraupidae | <i>Tangara viridicollis</i>      | 0.005 | 0.002 | 0.002 | 0.002 | 0.002 | 0     | 0.005 | 0     | 0.005 | 0.005 | 0     | 0.002 | 0     | 0     | 0     |
| Thraupidae | <i>Tangara xanthocephala</i>     | 0.908 | 0.998 | 0.998 | 0.998 | 0.998 | 0     | 0.988 | 0     | 0.988 | 0.988 | 0     | 0.003 | 0     | 0     | 0     |
| Thraupidae | <i>Tangara xanthogastra</i>      | 0     | 0.003 | 0     | 0     | 0     | 0     | 0.011 | 0     | 0     | 0     | 0     | 0.004 | 0     | 0     | 0     |
| Thraupidae | <i>Tersina viridis</i>           | 0     | 0.199 | 0     | 0     | 0     | 0     | 0.447 | 0     | 0     | 0     | 0     | 0.005 | 0     | 0     | 0     |
| Thraupidae | <i>Thlypopsis sordida</i>        | 0     | 0.239 | 0     | 0     | 0     | 0     | 0.639 | 0     | 0     | 0     | 0     | 0.002 | 0     | 0     | 0     |
| Thraupidae | <i>Thraupis bonariensis</i>      | 0.002 | 0.068 | 0.068 | 0.068 | 0.068 | 0.003 | 0.299 | 0.299 | 0.299 | 0.299 | 0.002 | 0.002 | 0.002 | 0.002 | 0.002 |
| Thraupidae | <i>Thraupis cyanocephala</i>     | 0.934 | 0.674 | 0.674 | 0.674 | 0.674 | 0.142 | 0.023 | 0.023 | 0.023 | 0.023 | 0     | 0.002 | 0     | 0.002 | 0.002 |
| Thraupidae | <i>Thraupis episcopus</i>        | 0     | 0.414 | 0     | 0     | 0     | 0     | 0.011 | 0     | 0     | 0     | 0     | 0.006 | 0     | 0     | 0     |
| Thraupidae | <i>Thraupis palmarum</i>         | 0     | 0.981 | 0     | 0     | 0     | 0     | 0.093 | 0     | 0     | 0     | 0     | 0.003 | 0     | 0     | 0     |
| Thraupidae | <i>Trichothraupis melanops</i>   | 0     | 0.028 | 0     | 0     | 0     | 0     | 0.006 | 0     | 0     | 0     | 0     | 0.001 | 0     | 0     | 0     |
| Tinamidae  | <i>Crypturellus atropicillus</i> | 0     | 0.007 | 0     | 0     | 0     | 0     | 0.007 | 0     | 0     | 0     | 0     | 0.008 | 0     | 0     | 0     |
| Tinamidae  | <i>Crypturellus bartletti</i>    | 0     | 0.005 | 0     | 0     | 0     | 0     | 0.004 | 0     | 0     | 0     | 0     | 0.004 | 0     | 0     | 0     |
| Tinamidae  | <i>Crypturellus cinereus</i>     | 0     | 0.001 | 0     | 0     | 0     | 0     | 0.001 | 0     | 0     | 0     | 0     | 0.001 | 0     | 0     | 0     |

|            |                                  |       |       |       |       |       |       |       |       |       |       |       |       |       |       |       |
|------------|----------------------------------|-------|-------|-------|-------|-------|-------|-------|-------|-------|-------|-------|-------|-------|-------|-------|
| Tinamidae  | <i>Crypturellus obsoletus</i>    | 0.326 | 0.010 | 0.010 | 0.010 | 0.010 | 0.021 | 0.774 | 0.774 | 0.774 | 0.774 | 0     | 0.003 | 0     | 0.003 | 0.003 |
| Tinamidae  | <i>Crypturellus soui</i>         | 0     | 0.065 | 0     | 0     | 0     | 0     | 0.057 | 0     | 0     | 0     | 0     | 0.003 | 0     | 0     | 0     |
| Tinamidae  | <i>Crypturellus strigulosus</i>  | 0     | 0.000 | 0     | 0     | 0     | 0     | 0.000 | 0     | 0     | 0     | 0     | 0.001 | 0     | 0     | 0     |
| Tinamidae  | <i>Crypturellus undulatus</i>    | 0     | 0.005 | 0     | 0     | 0     | 0     | 0.013 | 0     | 0     | 0     | 0     | 0.003 | 0     | 0     | 0     |
| Tinamidae  | <i>Crypturellus variegatus</i>   | 0     | 0.001 | 0     | 0     | 0     | 0     | 0.001 | 0     | 0     | 0     | 0     | 0.001 | 0     | 0     | 0     |
| Tinamidae  | <i>Nothocercus nigrocapillus</i> | 0.043 | 0.187 | 0.187 | 0.187 | 0.187 | 0.049 | 0.524 | 0.524 | 0.524 | 0.524 | 0     | 0.016 | 0     | 0.016 | 0.016 |
| Tinamidae  | <i>Tinamus guttatus</i>          | 0     | 0.001 | 0     | 0     | 0     | 0     | 0.001 | 0     | 0     | 0     | 0     | 0.001 | 0     | 0     | 0     |
| Tinamidae  | <i>Tinamus major</i>             | 0     | 0.003 | 0     | 0     | 0     | 0     | 0.004 | 0     | 0     | 0     | 0     | 0.003 | 0     | 0     | 0     |
| Tinamidae  | <i>Tinamus tao</i>               | 0     | 0.002 | 0     | 0     | 0     | 0     | 0.002 | 0     | 0     | 0     | 0     | 0.002 | 0     | 0     | 0     |
| Trogonidae | <i>Pharomachrus antisianus</i>   | 0     | 0.981 | 0     | 0.981 | 0.981 | 0     | 0.464 | 0     | 0     | 0     | 0     | 0.010 | 0     | 0     | 0     |
| Trogonidae | <i>Pharomachrus auriceps</i>     | 0.418 | 0.992 | 0.992 | 0.992 | 0.992 | 0.006 | 0.077 | 0.077 | 0.077 | 0.077 | 0     | 0.002 | 0     | 0.002 | 0.002 |
| Trogonidae | <i>Pharomachrus pavoninus</i>    | 0     | 0.017 | 0     | 0     | 0     | 0     | 0.007 | 0     | 0     | 0     | 0     | 0.012 | 0     | 0     | 0     |
| Trogonidae | <i>Trogon collaris</i>           | 0     | 0.892 | 0     | 0     | 0     | 0     | 0.271 | 0     | 0     | 0     | 0     | 0.007 | 0     | 0     | 0     |
| Trogonidae | <i>Trogon curucui</i>            | 0     | 0.008 | 0     | 0     | 0     | 0     | 0.006 | 0     | 0     | 0     | 0     | 0.003 | 0     | 0     | 0     |
| Trogonidae | <i>Trogon melanurus</i>          | 0     | 0.003 | 0     | 0     | 0     | 0     | 0.004 | 0     | 0     | 0     | 0     | 0.015 | 0     | 0     | 0     |
| Trogonidae | <i>Trogon personatus</i>         | 0.514 | 0.967 | 0.967 | 0.967 | 0.967 | 0.153 | 0.148 | 0.148 | 0.148 | 0.148 | 0.048 | 0.005 | 0.005 | 0.005 | 0.005 |
| Trogonidae | <i>Trogon violaceus</i>          | 0     | 0.031 | 0     | 0     | 0     | 0     | 0.015 | 0     | 0     | 0     | 0     | 0.020 | 0     | 0     | 0     |
| Trogonidae | <i>Trogon viridis</i>            | 0     | 0.043 | 0     | 0     | 0     | 0     | 0.009 | 0     | 0     | 0     | 0     | 0.005 | 0     | 0     | 0     |
| Turdidae   | <i>Catharus fuscater</i>         | 0.046 | 0.959 | 0.959 | 0.959 | 0.959 | 0     | 0.995 | 0     | 0.995 | 0.995 | 0     | 0.005 | 0     | 0     | 0     |
| Turdidae   | <i>Entomodestes leucotis</i>     | 0.009 | 0.105 | 0.105 | 0.105 | 0.105 | 0     | 0.013 | 0     | 0.013 | 0.013 | 0     | 0.002 | 0     | 0     | 0     |
| Turdidae   | <i>Myadestes ralloides</i>       | 0.788 | 0.972 | 0.972 | 0.972 | 0.972 | 0     | 0.563 | 0     | 0.563 | 0.563 | 0     | 0.002 | 0     | 0     | 0     |
| Turdidae   | <i>Turdus albicollis</i>         | 0     | 0.734 | 0     | 0     | 0     | 0     | 0.005 | 0     | 0     | 0     | 0     | 0.094 | 0     | 0     | 0     |
| Turdidae   | <i>Turdus chiguanco</i>          | 0.003 | 0.002 | 0.002 | 0.002 | 0.002 | 0.001 | 0.008 | 0.008 | 0.008 | 0.008 | 0.001 | 0.001 | 0.001 | 0.001 | 0.001 |
| Turdidae   | <i>Turdus fuscater</i>           | 0.917 | 0.991 | 0     | 0.991 | 0     | 0.014 | 0.522 | 0     | 0.522 | 0     | 0.629 | 0.005 | 0.005 | 0.005 | 0.005 |
| Turdidae   | <i>Turdus hauxwelli</i>          | 0     | 0.249 | 0     | 0     | 0     | 0     | 0.004 | 0     | 0     | 0     | 0     | 0.004 | 0     | 0     | 0     |
| Turdidae   | <i>Turdus ignobilis</i>          | 0     | 0.766 | 0     | 0     | 0     | 0     | 0.031 | 0     | 0     | 0     | 0     | 0.004 | 0     | 0     | 0     |
| Turdidae   | <i>Turdus leucops</i>            | 0.247 | 0.994 | 0.994 | 0.994 | 0.994 | 0     | 0.979 | 0     | 0.979 | 0.979 | 0     | 0.010 | 0     | 0     | 0     |
| Turdidae   | <i>Turdus nigriceps</i>          | 0     | 0.667 | 0     | 0     | 0     | 0     | 0.892 | 0     | 0     | 0     | 0     | 0.002 | 0     | 0     | 0     |
| Turdidae   | <i>Turdus serranus</i>           | 0.739 | 0.955 | 0.955 | 0.955 | 0.955 | 0.065 | 0.638 | 0.638 | 0.638 | 0.638 | 0     | 0.010 | 0     | 0.010 | 0.010 |
| Tyrannidae | <i>Elaenia albiceps</i>          | 0.322 | 0.292 | 0.292 | 0.292 | 0.292 | 0.128 | 0.285 | 0.285 | 0.285 | 0.285 | 0     | 0.877 | 0     | 0.877 | 0.877 |
| Tyrannidae | <i>Elaenia flavogaster</i>       | 0     | 0.178 | 0     | 0     | 0     | 0     | 0.836 | 0     | 0     | 0     | 0     | 0.003 | 0     | 0     | 0     |
| Tyrannidae | <i>Elaenia gigas</i>             | 0     | 0.019 | 0     | 0     | 0     | 0     | 0.054 | 0     | 0     | 0     | 0     | 0.018 | 0     | 0     | 0     |
| Tyrannidae | <i>Elaenia obscura</i>           | 0.254 | 0.351 | 0.351 | 0.351 | 0.351 | 0.567 | 0.934 | 0.934 | 0.934 | 0.934 | 0     | 0.053 | 0     | 0.053 | 0.053 |
| Tyrannidae | <i>Elaenia pallatangae</i>       | 0.322 | 0.595 | 0.595 | 0.595 | 0.595 | 0.015 | 0.816 | 0.816 | 0.816 | 0.816 | 0     | 0.004 | 0     | 0.004 | 0.004 |
| Tyrannidae | <i>Lophotriccus pileatus</i>     | 0     | 0.315 | 0     | 0     | 0     | 0     | 0.625 | 0     | 0     | 0     | 0     | 0.004 | 0     | 0     | 0     |
| Tyrannidae | <i>Mionectes macconnelli</i>     | 0     | 0.003 | 0     | 0     | 0     | 0     | 0.002 | 0     | 0     | 0     | 0     | 0.003 | 0     | 0     | 0     |
| Tyrannidae | <i>Mionectes oleagineus</i>      | 0     | 0.822 | 0     | 0     | 0     | 0     | 0.003 | 0     | 0     | 0     | 0     | 0.002 | 0     | 0     | 0     |
| Tyrannidae | <i>Mionectes olivaceus</i>       | 0     | 0.197 | 0     | 0     | 0     | 0     | 0.599 | 0     | 0     | 0     | 0     | 0.003 | 0     | 0     | 0     |
| Tyrannidae | <i>Mionectes striaticollis</i>   | 0.894 | 0.993 | 0.993 | 0.993 | 0.993 | 0.139 | 0.325 | 0.325 | 0.325 | 0.325 | 0     | 0.014 | 0     | 0.014 | 0.014 |
| Tyrannidae | <i>Zimmerius bolivianus</i>      | 0.009 | 0.092 | 0.092 | 0.092 | 0.092 | 0     | 0.524 | 0     | 0.524 | 0.524 | 0     | 0.001 | 0     | 0     | 0     |
| Tyrannidae | <i>Zimmerius gracilipes</i>      | 0     | 0.010 | 0     | 0     | 0     | 0     | 0.017 | 0     | 0     | 0     | 0     | 0.013 | 0     | 0     | 0     |

**Table S5.** TSS evaluation of the species distribution models (SDMs). SDMs were fitted for all 232 frugivorous bird species of the Manú Biosphere Reserve (Peru) based on mean annual temperature and precipitation. For each species, five SDM methods were fitted: generalized linear models (GLM), generalized additive models (GAM), boosted regression trees (GBM), random forest (RF) and maximum entropy models (MAXENT). For all SDMs the evaluation metric for the evaluation dataset (20% of total number of occurrences) is given, in addition to the sensitivity and specificity values of the model. The best model per species was chosen by selecting the model with the highest true skill statistic (TSS) evaluation metric, i.e., the sum of sensitivity and specificity minus one. The values provided for RF and GBM models are the mean values of the 10 model runs.

|              |                                    |                                   | TSS                          |       |       |        |       |             |       |       |        |       |             |       |       |        |       | Best model selection |
|--------------|------------------------------------|-----------------------------------|------------------------------|-------|-------|--------|-------|-------------|-------|-------|--------|-------|-------------|-------|-------|--------|-------|----------------------|
|              |                                    |                                   | TSS value of evaluation data |       |       |        |       | Sensitivity |       |       |        |       | Specificity |       |       |        |       |                      |
| Family       | Bird species                       | Number of GBIF occurrence records | RF                           | GBM   | GAM   | MAXENT | GLM   | RF          | GBM   | GAM   | MAXENT | GLM   | RF          | GBM   | GAM   | MAXENT | GLM   |                      |
| Cardinalidae | <i>Cyanocompsa cyanoides</i>       | 864                               | 0.700                        | 0.667 | 0.537 | 0.555  | 0.533 | 0.823       | 0.835 | 0.881 | 0.833  | 0.845 | 0.876       | 0.830 | 0.654 | 0.720  | 0.687 | RF                   |
| Cardinalidae | <i>Pheucticus aureoventris</i>     | 717                               | 0.732                        | 0.653 | 0.595 | 0.642  | 0.479 | 0.880       | 0.817 | 0.841 | 0.841  | 0.783 | 0.852       | 0.835 | 0.754 | 0.802  | 0.697 | RF                   |
| Cardinalidae | <i>Pheucticus chrysogaster</i>     | 1375                              | 0.786                        | 0.667 | 0.485 | 0.568  | 0.426 | 0.872       | 0.850 | 0.887 | 0.938  | 0.858 | 0.913       | 0.817 | 0.598 | 0.629  | 0.567 | RF                   |
| Cardinalidae | <i>Saltator aurantiirostris</i>    | 1244                              | 0.767                        | 0.647 | 0.611 | 0.653  | 0.639 | 0.889       | 0.921 | 0.925 | 0.849  | 0.921 | 0.878       | 0.725 | 0.690 | 0.804  | 0.717 | RF                   |
| Cardinalidae | <i>Saltator coerulescens</i>       | 2571                              | 0.690                        | 0.582 | 0.474 | 0.467  | 0.488 | 0.819       | 0.801 | 0.785 | 0.928  | 0.819 | 0.871       | 0.780 | 0.693 | 0.539  | 0.668 | RF                   |
| Cardinalidae | <i>Saltator grossus</i>            | 1042                              | 0.786                        | 0.753 | 0.684 | 0.709  | 0.672 | 0.900       | 0.922 | 0.861 | 0.876  | 0.831 | 0.886       | 0.830 | 0.823 | 0.833  | 0.840 | RF                   |
| Cardinalidae | <i>Saltator maximus</i>            | 3332                              | 0.757                        | 0.619 | 0.528 | 0.571  | 0.527 | 0.851       | 0.817 | 0.827 | 0.869  | 0.813 | 0.906       | 0.802 | 0.701 | 0.699  | 0.716 | RF                   |
| Columbidae   | <i>Geotrygon montana</i>           | 803                               | 0.713                        | 0.683 | 0.610 | 0.620  | 0.648 | 0.847       | 0.876 | 0.898 | 0.898  | 0.904 | 0.866       | 0.807 | 0.710 | 0.722  | 0.743 | RF                   |
| Columbidae   | <i>Patagioenas cayennensis</i>     | 2881                              | 0.714                        | 0.575 | 0.548 | 0.544  | 0.499 | 0.850       | 0.868 | 0.825 | 0.875  | 0.933 | 0.864       | 0.707 | 0.723 | 0.673  | 0.565 | RF                   |
| Columbidae   | <i>Patagioenas fasciata</i>        | 2417                              | 0.794                        | 0.647 | 0.569 | 0.605  | 0.584 | 0.853       | 0.870 | 0.916 | 0.842  | 0.835 | 0.941       | 0.776 | 0.653 | 0.761  | 0.750 | RF                   |
| Columbidae   | <i>Patagioenas plumbea</i>         | 3003                              | 0.785                        | 0.651 | 0.600 | 0.552  | 0.580 | 0.856       | 0.839 | 0.769 | 0.853  | 0.851 | 0.928       | 0.812 | 0.831 | 0.700  | 0.727 | RF                   |
| Columbidae   | <i>Patagioenas subvinacea</i>      | 2334                              | 0.758                        | 0.633 | 0.595 | 0.592  | 0.573 | 0.836       | 0.828 | 0.779 | 0.794  | 0.736 | 0.922       | 0.804 | 0.816 | 0.797  | 0.837 | RF                   |
| Corvidae     | <i>Cyanocorax cyanomelas</i>       | 1213                              | 0.788                        | 0.723 | 0.632 | 0.686  | 0.578 | 0.907       | 0.914 | 0.886 | 0.916  | 0.945 | 0.881       | 0.809 | 0.745 | 0.770  | 0.633 | RF                   |
| Corvidae     | <i>Cyanocorax violaceus</i>        | 1689                              | 0.869                        | 0.822 | 0.764 | 0.826  | 0.792 | 0.932       | 0.952 | 0.937 | 0.919  | 0.928 | 0.937       | 0.870 | 0.828 | 0.907  | 0.864 | RF                   |
| Corvidae     | <i>Cyanocorax yncas</i>            | 1911                              | 0.803                        | 0.683 | 0.623 | 0.591  | 0.538 | 0.871       | 0.878 | 0.837 | 0.784  | 0.771 | 0.931       | 0.804 | 0.786 | 0.804  | 0.767 | RF                   |
| Cotingidae   | <i>Ampelioides tschudii</i>        | 263                               | 0.876                        | 0.831 | 0.796 | 0.696  | 0.633 | 0.919       | 0.921 | 0.923 | 0.808  | 0.923 | 0.957       | 0.908 | 0.873 | 0.888  | 0.710 | RF                   |
| Cotingidae   | <i>Ampelion rubrocristatus</i>     | 838                               | 0.762                        | 0.702 | 0.653 | 0.684  | 0.673 | 0.916       | 0.896 | 0.927 | 0.897  | 0.964 | 0.846       | 0.805 | 0.726 | 0.787  | 0.709 | RF                   |
| Cotingidae   | <i>Ampelion rufaxilla</i>          | 103                               | 0.792                        | 0.830 | 0.719 | 0.622  | 0.688 | 0.930       | 0.935 | 0.950 | 1      | 0.950 | 0.857       | 0.895 | 0.769 | 0.622  | 0.737 | GBM                  |
| Cotingidae   | <i>Cephalopterus ornatus</i>       | 387                               | 0.793                        | 0.791 | 0.724 | 0.696  | 0.714 | 0.878       | 0.918 | 0.921 | 0.921  | 0.934 | 0.913       | 0.873 | 0.802 | 0.774  | 0.778 | RF                   |
| Cotingidae   | <i>Conioptilon mcilhennyi</i>      | 53                                | 0.936                        | 0.945 | 0.937 | 0.986  | 0.740 | 0.973       | 0.973 | 1     | 1      | 1     | 0.964       | 0.973 | 0     | 0.986  | 0.740 | MAXENT               |
| Cotingidae   | <i>Cotinga cayana</i>              | 536                               | 0.822                        | 0.818 | 0.821 | 0.847  | 0.802 | 0.928       | 0.920 | 0.915 | 0.943  | 0.962 | 0.893       | 0.898 | 0.906 | 0.904  | 0.840 | MAXENT               |
| Cotingidae   | <i>Cotinga maynana</i>             | 398                               | 0.909                        | 0.884 | 0.842 | 0.808  | 0.857 | 0.972       | 0.980 | 0.937 | 0.987  | 0.975 | 0.936       | 0.903 | 0.906 | 0.817  | 0.883 | RF                   |
| Cotingidae   | <i>Gymnoderus foetidus</i>         | 812                               | 0.867                        | 0.808 | 0.794 | 0.784  | 0.786 | 0.943       | 0.920 | 0.981 | 0.969  | 0.963 | 0.924       | 0.887 | 0.813 | 0.813  | 0.824 | RF                   |
| Cotingidae   | <i>Iodopleura isabellae</i>        | 298                               | 0.852                        | 0.828 | 0.793 | 0.839  | 0.732 | 0.945       | 0.990 | 0.914 | 0.983  | 0.897 | 0.907       | 0.838 | 0.879 | 0.856  | 0.835 | RF                   |
| Cotingidae   | <i>Laniocera hypopyrra</i>         | 284                               | 0.795                        | 0.822 | 0.762 | 0.779  | 0.835 | 0.921       | 0.977 | 0.982 | 0.857  | 1     | 0.870       | 0.846 | 0.780 | 0.922  | 0.835 | GLM                  |
| Cotingidae   | <i>Lipaugus vociferans</i>         | 1839                              | 0.810                        | 0.783 | 0.749 | 0.777  | 0.748 | 0.922       | 0.950 | 0.972 | 0.942  | 0.964 | 0.888       | 0.833 | 0.777 | 0.835  | 0.784 | RF                   |
| Cotingidae   | <i>Oxyruncus cristatus</i>         | 141                               | 0.722                        | 0.750 | 0.678 | 0.678  | 0.591 | 0.846       | 0.893 | 0.786 | 0.857  | 0.786 | 0.875       | 0.854 | 0.892 | 0.818  | 0.805 | GBM                  |
| Cotingidae   | <i>Pipreola arcuata</i>            | 457                               | 0.813                        | 0.712 | 0.688 | 0.719  | 0.677 | 0.900       | 0.874 | 0.890 | 0.912  | 0.879 | 0.913       | 0.837 | 0.798 | 0.807  | 0.797 | RF                   |
| Cotingidae   | <i>Pipreola frontalis</i>          | 51                                | 0.780                        | 0.770 | 0.862 | 0.656  | 0.864 | 0.980       | 0.940 | 1     | 0.900  | 1     | 0.800       | 0.840 | 0.862 | 0.756  | 0.863 | GLM                  |
| Cotingidae   | <i>Pipreola intermedia</i>         | 94                                | 0.816                        | 0.721 | 0.731 | 0.669  | 0.537 | 0.947       | 0.858 | 1     | 0.947  | 0.895 | 0.868       | 0.863 | 0.731 | 0.722  | 0.641 | RF                   |
| Cotingidae   | <i>Porphyrolaema porphyrolaema</i> | 72                                | 0.900                        | 0.886 | 0.936 | 0.956  | 0.861 | 0.986       | 0.986 | 1     | 1      | 0.929 | 0.914       | 0.900 | 0.936 | 0.956  | 0.933 | MAXENT               |
| Cotingidae   | <i>Querula purpurata</i>           | 1181                              | 0.842                        | 0.806 | 0.776 | 0.747  | 0.746 | 0.932       | 0.926 | 0.956 | 0.876  | 0.929 | 0.910       | 0.881 | 0.820 | 0.871  | 0.816 | RF                   |
| Cotingidae   | <i>Rupicola peruvianus</i>         | 1451                              | 0.845                        | 0.769 | 0.678 | 0.728  | 0.667 | 0.900       | 0.871 | 0.872 | 0.820  | 0.830 | 0.946       | 0.898 | 0.807 | 0.908  | 0.836 | RF                   |
| Cotingidae   | <i>Snowornis subalaris</i>         | 56                                | 0.900                        | 0.836 | 0.914 | 0.786  | 0.901 | 0.964       | 0.900 | 1     | 1      | 1     | 0.936       | 0.936 | 0.915 | 0.784  | 0.900 | GAM                  |
| Cotingidae   | <i>Tityra cayana</i>               | 1097                              | 0.730                        | 0.639 | 0.593 | 0.568  | 0.558 | 0.824       | 0.917 | 0.902 | 0.935  | 0.930 | 0.905       | 0.722 | 0.691 | 0.629  | 0.625 | RF                   |



|                |                                    |      |       |       |       |       |       |       |       |       |       |       |       |       |       |       |       |        |
|----------------|------------------------------------|------|-------|-------|-------|-------|-------|-------|-------|-------|-------|-------|-------|-------|-------|-------|-------|--------|
| Cotingidae     | <i>Tityra inquisitor</i>           | 613  | 0.694 | 0.652 | 0.524 | 0.571 | 0.498 | 0.864 | 0.879 | 0.897 | 0.821 | 0.974 | 0.830 | 0.773 | 0.627 | 0.749 | 0.524 | RF     |
| Cotingidae     | <i>Tityra semifasciata</i>         | 1308 | 0.735 | 0.664 | 0.623 | 0.617 | 0.604 | 0.877 | 0.859 | 0.757 | 0.749 | 0.869 | 0.858 | 0.803 | 0.866 | 0.868 | 0.735 | RF     |
| Cracidae       | <i>Aburria aburri</i>              | 410  | 0.848 | 0.779 | 0.711 | 0.735 | 0.707 | 0.918 | 0.884 | 0.878 | 0.817 | 0.805 | 0.929 | 0.890 | 0.832 | 0.918 | 0.901 | RF     |
| Cracidae       | <i>Mitu tuberosum</i>              | 323  | 0.853 | 0.810 | 0.826 | 0.849 | 0.811 | 0.925 | 0.886 | 0.953 | 0.953 | 0.906 | 0.928 | 0.925 | 0.872 | 0.896 | 0.905 | RF     |
| Cracidae       | <i>Ortalis guttata</i>             | 2049 | 0.783 | 0.685 | 0.617 | 0.594 | 0.603 | 0.880 | 0.880 | 0.807 | 0.861 | 0.847 | 0.903 | 0.805 | 0.809 | 0.734 | 0.756 | RF     |
| Cracidae       | <i>Penelope jacquacu</i>           | 1067 | 0.838 | 0.795 | 0.743 | 0.725 | 0.727 | 0.915 | 0.922 | 0.953 | 0.948 | 0.934 | 0.923 | 0.872 | 0.791 | 0.776 | 0.794 | RF     |
| Cracidae       | <i>Penelope montagnii</i>          | 829  | 0.796 | 0.748 | 0.649 | 0.666 | 0.604 | 0.902 | 0.932 | 0.880 | 0.904 | 0.892 | 0.892 | 0.815 | 0.770 | 0.761 | 0.712 | RF     |
| Cracidae       | <i>Pipile cumanensis</i>           | 817  | 0.818 | 0.781 | 0.794 | 0.783 | 0.688 | 0.884 | 0.859 | 0.919 | 0.919 | 0.944 | 0.933 | 0.921 | 0.875 | 0.864 | 0.744 | RF     |
| Icteridae      | <i>Cacicus cela</i>                | 4304 | 0.793 | 0.665 | 0.648 | 0.645 | 0.648 | 0.895 | 0.911 | 0.874 | 0.938 | 0.893 | 0.898 | 0.754 | 0.773 | 0.707 | 0.755 | RF     |
| Icteridae      | <i>Cacicus chrysonotus</i>         | 643  | 0.817 | 0.771 | 0.702 | 0.722 | 0.665 | 0.916 | 0.895 | 0.945 | 0.898 | 0.930 | 0.901 | 0.876 | 0.756 | 0.823 | 0.734 | RF     |
| Icteridae      | <i>Cacicus haemorrhous</i>         | 964  | 0.761 | 0.647 | 0.557 | 0.575 | 0.579 | 0.868 | 0.829 | 0.915 | 0.905 | 0.952 | 0.893 | 0.818 | 0.641 | 0.670 | 0.627 | RF     |
| Icteridae      | <i>Clypicterus oseryi</i>          | 300  | 0.945 | 0.930 | 0.899 | 0.919 | 0.856 | 0.975 | 0.977 | 0.983 | 0.950 | 0.950 | 0.970 | 0.953 | 0.916 | 0.969 | 0.906 | RF     |
| Icteridae      | <i>Icterus icterus</i>             | 391  | 0.795 | 0.800 | 0.741 | 0.728 | 0.704 | 0.888 | 0.932 | 0.857 | 0.818 | 0.831 | 0.906 | 0.868 | 0.884 | 0.909 | 0.871 | GBM    |
| Icteridae      | <i>Molothrus oryzivorus</i>        | 1674 | 0.691 | 0.603 | 0.546 | 0.574 | 0.505 | 0.810 | 0.848 | 0.878 | 0.884 | 0.862 | 0.881 | 0.754 | 0.667 | 0.689 | 0.642 | RF     |
| Icteridae      | <i>Psarocolius angustifrons</i>    | 3654 | 0.860 | 0.740 | 0.674 | 0.679 | 0.655 | 0.922 | 0.875 | 0.851 | 0.818 | 0.841 | 0.938 | 0.864 | 0.822 | 0.862 | 0.814 | RF     |
| Icteridae      | <i>Psarocolius atrovirens</i>      | 624  | 0.860 | 0.697 | 0.659 | 0.626 | 0.582 | 0.898 | 0.876 | 0.808 | 0.752 | 0.840 | 0.962 | 0.821 | 0.849 | 0.874 | 0.742 | RF     |
| Icteridae      | <i>Psarocolius bifasciatus</i>     | 667  | 0.799 | 0.787 | 0.769 | 0.768 | 0.734 | 0.895 | 0.942 | 0.985 | 0.886 | 0.970 | 0.904 | 0.844 | 0.784 | 0.882 | 0.764 | RF     |
| Icteridae      | <i>Psarocolius decumanus</i>       | 3404 | 0.717 | 0.549 | 0.466 | 0.483 | 0.472 | 0.825 | 0.813 | 0.918 | 0.734 | 0.961 | 0.892 | 0.735 | 0.547 | 0.743 | 0.510 | RF     |
| Odontophoridae | <i>Odontophorus balliviani</i>     | 57   | 0.736 | 0.618 | 0.646 | 0.731 | 0.552 | 0.955 | 0.873 | 1     | 1     | 0.909 | 0.782 | 0.745 | 0.646 | 0.726 | 0.643 | RF     |
| Odontophoridae | <i>Odontophorus speciosus</i>      | 206  | 0.781 | 0.685 | 0.681 | 0.613 | 0.671 | 0.861 | 0.888 | 0.854 | 0.878 | 0.854 | 0.912 | 0.798 | 0.828 | 0.734 | 0.816 | RF     |
| Odontophoridae | <i>Odontophorus stellatus</i>      | 236  | 0.932 | 0.919 | 0.879 | 0.780 | 0.797 | 0.962 | 0.964 | 1     | 0.915 | 1     | 0.970 | 0.955 | 0.879 | 0.865 | 0.797 | RF     |
| Picidae        | <i>Celeus elegans</i>              | 536  | 0.846 | 0.830 | 0.773 | 0.810 | 0.755 | 0.944 | 0.926 | 0.924 | 0.952 | 0.933 | 0.901 | 0.905 | 0.850 | 0.858 | 0.822 | RF     |
| Picidae        | <i>Celeus flavus</i>               | 474  | 0.777 | 0.798 | 0.766 | 0.739 | 0.724 | 0.948 | 0.947 | 0.957 | 0.946 | 0.903 | 0.828 | 0.849 | 0.809 | 0.791 | 0.820 | GBM    |
| Picidae        | <i>Celeus grammicus</i>            | 421  | 0.844 | 0.842 | 0.818 | 0.773 | 0.823 | 0.930 | 0.968 | 0.902 | 0.976 | 0.976 | 0.913 | 0.873 | 0.916 | 0.796 | 0.847 | RF     |
| Picidae        | <i>Celeus spectabilis</i>          | 97   | 0.921 | 0.874 | 0.890 | 0.842 | 0.905 | 0.942 | 0.895 | 0.947 | 0.895 | 0.947 | 0.979 | 0.979 | 0.943 | 0.948 | 0.958 | RF     |
| Picidae        | <i>Celeus torquatus</i>            | 256  | 0.818 | 0.822 | 0.743 | 0.776 | 0.722 | 0.937 | 0.978 | 0.922 | 0.980 | 0.941 | 0.880 | 0.843 | 0.822 | 0.796 | 0.781 | GBM    |
| Picidae        | <i>Colaptes rubiginosus</i>        | 1759 | 0.775 | 0.679 | 0.527 | 0.638 | 0.538 | 0.859 | 0.839 | 0.710 | 0.867 | 0.855 | 0.915 | 0.839 | 0.817 | 0.771 | 0.680 | RF     |
| Pipridae       | <i>Chiroxiphia boliviana</i>       | 340  | 0.868 | 0.778 | 0.653 | 0.665 | 0.679 | 0.944 | 0.921 | 0.794 | 0.838 | 0.971 | 0.922 | 0.857 | 0.859 | 0.827 | 0.708 | RF     |
| Pipridae       | <i>Chiroxiphia pareola</i>         | 395  | 0.767 | 0.777 | 0.663 | 0.686 | 0.555 | 0.905 | 0.906 | 0.910 | 0.923 | 0.808 | 0.862 | 0.871 | 0.752 | 0.762 | 0.747 | GBM    |
| Pipridae       | <i>Lepidothrix coeruleocapilla</i> | 100  | 0.938 | 0.913 | 0.891 | 0.810 | 0.841 | 0.953 | 0.963 | 1     | 1     | 0.947 | 0.985 | 0.950 | 0.891 | 0.811 | 0.893 | RF     |
| Pipridae       | <i>Lepidothrix coronata</i>        | 981  | 0.864 | 0.884 | 0.796 | 0.821 | 0.829 | 0.938 | 0.963 | 0.979 | 0.989 | 0.963 | 0.926 | 0.921 | 0.818 | 0.831 | 0.866 | GBM    |
| Pipridae       | <i>Machaeropterus pyrocephalus</i> | 362  | 0.879 | 0.871 | 0.784 | 0.770 | 0.814 | 0.944 | 0.953 | 0.889 | 0.889 | 0.944 | 0.935 | 0.918 | 0.895 | 0.881 | 0.869 | RF     |
| Pipridae       | <i>Manacus manacus</i>             | 2059 | 0.815 | 0.701 | 0.628 | 0.590 | 0.596 | 0.890 | 0.829 | 0.924 | 0.934 | 0.874 | 0.925 | 0.872 | 0.704 | 0.656 | 0.722 | RF     |
| Pipridae       | <i>Neopelma sulphureiventer</i>    | 50   | 0.880 | 0.880 | 0.821 | 0.681 | 0.658 | 0.950 | 0.990 | 1     | 0.800 | 1     | 0.930 | 0.890 | 0.821 | 0.881 | 0.658 | RF     |
| Pipridae       | <i>Pipra chloromeros</i>           | 370  | 0.848 | 0.809 | 0.742 | 0.766 | 0.742 | 0.925 | 0.921 | 0.875 | 0.847 | 0.847 | 0.923 | 0.888 | 0.866 | 0.919 | 0.895 | RF     |
| Pipridae       | <i>Pipra fasciicauda</i>           | 670  | 0.878 | 0.787 | 0.761 | 0.784 | 0.676 | 0.948 | 0.940 | 0.962 | 0.985 | 0.932 | 0.929 | 0.847 | 0.799 | 0.799 | 0.745 | RF     |
| Pipridae       | <i>Xenopipo holochlora</i>         | 165  | 0.863 | 0.826 | 0.821 | 0.830 | 0.812 | 0.969 | 0.910 | 1     | 0.897 | 0.897 | 0.894 | 0.915 | 0.821 | 0.933 | 0.915 | RF     |
| Pipridae       | <i>Xenopipo unicolor</i>           | 53   | 0.810 | 0.852 | 0.664 | 0.617 | 0.510 | 0.910 | 0.970 | 0.800 | 0.900 | 0.900 | 0.900 | 0.882 | 0.863 | 0.716 | 0.609 | GBM    |
| Psittacidae    | <i>Amazona farinosa</i>            | 1976 | 0.809 | 0.767 | 0.743 | 0.730 | 0.764 | 0.909 | 0.908 | 0.894 | 0.935 | 0.948 | 0.901 | 0.859 | 0.849 | 0.794 | 0.816 | RF     |
| Psittacidae    | <i>Amazona mercenaria</i>          | 65   | 0.709 | 0.823 | 0.633 | 0.643 | 0.538 | 0.917 | 1     | 0.833 | 0.750 | 0.833 | 0.792 | 0.823 | 0.799 | 0.893 | 0.705 | GBM    |
| Psittacidae    | <i>Amazona ochrocephala</i>        | 1458 | 0.804 | 0.732 | 0.711 | 0.720 | 0.743 | 0.898 | 0.904 | 0.913 | 0.941 | 0.920 | 0.905 | 0.827 | 0.798 | 0.779 | 0.823 | RF     |
| Psittacidae    | <i>Ara ararauna</i>                | 1776 | 0.816 | 0.811 | 0.697 | 0.705 | 0.717 | 0.903 | 0.945 | 0.892 | 0.835 | 0.934 | 0.913 | 0.866 | 0.804 | 0.863 | 0.783 | RF     |
| Psittacidae    | <i>Ara chloropterus</i>            | 1304 | 0.790 | 0.750 | 0.696 | 0.720 | 0.698 | 0.882 | 0.877 | 0.973 | 0.938 | 0.923 | 0.908 | 0.872 | 0.723 | 0.781 | 0.775 | RF     |
| Psittacidae    | <i>Ara macao</i>                   | 1437 | 0.860 | 0.812 | 0.757 | 0.826 | 0.759 | 0.934 | 0.910 | 0.969 | 0.944 | 0.986 | 0.926 | 0.901 | 0.788 | 0.882 | 0.773 | RF     |
| Psittacidae    | <i>Ara militaris</i>               | 219  | 0.759 | 0.756 | 0.609 | 0.543 | 0.544 | 0.884 | 0.965 | 0.977 | 0.674 | 0.907 | 0.875 | 0.791 | 0.631 | 0.868 | 0.637 | RF     |
| Psittacidae    | <i>Ara severus</i>                 | 2178 | 0.825 | 0.734 | 0.686 | 0.666 | 0.651 | 0.906 | 0.913 | 0.862 | 0.937 | 0.836 | 0.918 | 0.820 | 0.824 | 0.730 | 0.815 | RF     |
| Psittacidae    | <i>Aratinga leucophthalma</i>      | 2308 | 0.740 | 0.616 | 0.549 | 0.552 | 0.489 | 0.837 | 0.836 | 0.772 | 0.896 | 0.905 | 0.902 | 0.778 | 0.777 | 0.655 | 0.584 | RF     |
| Psittacidae    | <i>Aratinga mitrata</i>            | 651  | 0.803 | 0.758 | 0.739 | 0.736 | 0.716 | 0.932 | 0.933 | 0.922 | 0.899 | 0.907 | 0.872 | 0.824 | 0.816 | 0.837 | 0.809 | RF     |
| Psittacidae    | <i>Aratinga weddellii</i>          | 1240 | 0.863 | 0.829 | 0.770 | 0.795 | 0.770 | 0.945 | 0.953 | 0.967 | 0.975 | 0.996 | 0.918 | 0.877 | 0.803 | 0.819 | 0.774 | RF     |
| Psittacidae    | <i>Bolborhynchus lineola</i>       | 276  | 0.835 | 0.818 | 0.749 | 0.837 | 0.756 | 0.953 | 0.956 | 0.891 | 0.982 | 0.964 | 0.882 | 0.862 | 0.858 | 0.855 | 0.792 | MAXENT |

|                 |                                       |      |       |       |       |       |       |       |       |       |       |       |       |       |       |       |       |        |
|-----------------|---------------------------------------|------|-------|-------|-------|-------|-------|-------|-------|-------|-------|-------|-------|-------|-------|-------|-------|--------|
| Psittacidae     | <i>Bolborhynchus orbygnesi</i>        | 100  | 0.790 | 0.805 | 0.757 | 0.750 | 0.564 | 0.900 | 0.905 | 1     | 1     | 0.850 | 0.890 | 0.900 | 0.758 | 0.750 | 0.714 | GBM    |
| Psittacidae     | <i>Brotogeris cyanoptera</i>          | 1903 | 0.881 | 0.857 | 0.768 | 0.774 | 0.773 | 0.957 | 0.952 | 0.957 | 0.968 | 0.899 | 0.924 | 0.904 | 0.811 | 0.806 | 0.874 | RF     |
| Psittacidae     | <i>Brotogeris sanctithomae</i>        | 391  | 0.883 | 0.835 | 0.821 | 0.887 | 0.816 | 0.962 | 0.938 | 0.987 | 0.987 | 0.974 | 0.921 | 0.897 | 0.834 | 0.900 | 0.842 | MAXENT |
| Psittacidae     | <i>Forpus modestus</i>                | 296  | 0.832 | 0.820 | 0.901 | 0.804 | 0.783 | 0.915 | 0.914 | 0.966 | 0.915 | 0.847 | 0.917 | 0.907 | 0.935 | 0.889 | 0.936 | GAM    |
| Psittacidae     | <i>Nannopsittaca dachilleae</i>       | 46   | 0.922 | 0.989 | 0.979 | 0.973 | 0.734 | 0.967 | 1     | 1     | 1     | 0.889 | 0.956 | 0.989 | 0.979 | 0.973 | 0.846 | GBM    |
| Psittacidae     | <i>Orthopsittaca manilata</i>         | 1040 | 0.798 | 0.757 | 0.734 | 0.786 | 0.761 | 0.921 | 0.938 | 0.893 | 0.922 | 0.956 | 0.876 | 0.819 | 0.841 | 0.863 | 0.805 | RF     |
| Psittacidae     | <i>Pionites leucogaster</i>           | 476  | 0.943 | 0.928 | 0.891 | 0.882 | 0.871 | 0.975 | 0.959 | 0.958 | 0.926 | 0.958 | 0.968 | 0.968 | 0.934 | 0.956 | 0.913 | RF     |
| Psittacidae     | <i>Pionus menstruus</i>               | 3293 | 0.756 | 0.661 | 0.644 | 0.646 | 0.627 | 0.873 | 0.872 | 0.906 | 0.925 | 0.891 | 0.882 | 0.789 | 0.737 | 0.721 | 0.735 | RF     |
| Psittacidae     | <i>Pionus tumultuosus</i>             | 544  | 0.805 | 0.762 | 0.661 | 0.699 | 0.678 | 0.900 | 0.937 | 0.944 | 0.870 | 0.889 | 0.905 | 0.825 | 0.717 | 0.828 | 0.790 | RF     |
| Psittacidae     | <i>Primolius couloni</i>              | 239  | 0.923 | 0.873 | 0.876 | 0.877 | 0.835 | 0.944 | 0.937 | 0.979 | 0.958 | 0.896 | 0.979 | 0.935 | 0.897 | 0.919 | 0.940 | RF     |
| Psittacidae     | <i>Pyrilia barrabandi</i>             | 432  | 0.881 | 0.888 | 0.910 | 0.887 | 0.849 | 0.960 | 0.952 | 1     | 0.977 | 0.965 | 0.921 | 0.934 | 0.911 | 0.911 | 0.884 | GAM    |
| Psittacidae     | <i>Pyrrhura roseifrons</i>            | 117  | 0.896 | 0.892 | 0.899 | 0.772 | 0.809 | 0.978 | 0.983 | 1     | 0.957 | 1     | 0.909 | 0.909 | 0.899 | 0.815 | 0.810 | GAM    |
| Psittacidae     | <i>Pyrrhura rupicola</i>              | 180  | 0.903 | 0.842 | 0.918 | 0.763 | 0.769 | 0.953 | 0.897 | 0.972 | 0.861 | 0.889 | 0.950 | 0.942 | 0.946 | 0.901 | 0.880 | GAM    |
| Psittacidae     | <i>Touit huetii</i>                   | 140  | 0.904 | 0.832 | 0.808 | 0.875 | 0.851 | 0.954 | 0.961 | 0.964 | 0.964 | 1     | 0.950 | 0.871 | 0.843 | 0.911 | 0.851 | RF     |
| Psophiidae      | <i>Psophia leucoptera</i>             | 184  | 0.908 | 0.895 | 0.807 | 0.827 | 0.863 | 0.965 | 0.986 | 0.946 | 0.919 | 0.973 | 0.943 | 0.908 | 0.862 | 0.909 | 0.890 | RF     |
| Ramphastidae    | <i>Andigena hypoglauca</i>            | 365  | 0.834 | 0.721 | 0.611 | 0.713 | 0.582 | 0.903 | 0.854 | 0.944 | 0.903 | 0.778 | 0.932 | 0.867 | 0.666 | 0.809 | 0.804 | RF     |
| Ramphastidae    | <i>Aulacorhynchus coeruleicinctis</i> | 238  | 0.779 | 0.806 | 0.644 | 0.721 | 0.632 | 0.881 | 0.885 | 0.872 | 0.872 | 0.872 | 0.898 | 0.921 | 0.772 | 0.849 | 0.759 | GBM    |
| Ramphastidae    | <i>Aulacorhynchus derbianus</i>       | 201  | 0.755 | 0.698 | 0.566 | 0.680 | 0.594 | 0.838 | 0.858 | 0.775 | 0.925 | 0.875 | 0.918 | 0.840 | 0.791 | 0.755 | 0.719 | RF     |
| Ramphastidae    | <i>Aulacorhynchus prasinus</i>        | 1122 | 0.790 | 0.707 | 0.591 | 0.638 | 0.553 | 0.908 | 0.886 | 0.882 | 0.869 | 0.923 | 0.882 | 0.820 | 0.708 | 0.769 | 0.630 | RF     |
| Ramphastidae    | <i>Capito auratus</i>                 | 1622 | 0.869 | 0.814 | 0.770 | 0.781 | 0.749 | 0.938 | 0.947 | 0.874 | 0.893 | 0.877 | 0.931 | 0.867 | 0.896 | 0.888 | 0.872 | RF     |
| Ramphastidae    | <i>Eubucco richardsoni</i>            | 660  | 0.883 | 0.870 | 0.820 | 0.797 | 0.827 | 0.948 | 0.973 | 0.962 | 0.901 | 0.939 | 0.935 | 0.898 | 0.858 | 0.896 | 0.888 | RF     |
| Ramphastidae    | <i>Eubucco tucinkae</i>               | 86   | 0.959 | 0.941 | 0.924 | 0.936 | 0.937 | 0.982 | 0.965 | 0.941 | 0.941 | 1     | 0.976 | 0.976 | 0.983 | 0.995 | 0.937 | RF     |
| Ramphastidae    | <i>Eubucco versicolor</i>             | 345  | 0.826 | 0.774 | 0.719 | 0.683 | 0.730 | 0.906 | 0.875 | 0.913 | 0.826 | 0.928 | 0.919 | 0.897 | 0.806 | 0.855 | 0.802 | RF     |
| Ramphastidae    | <i>Pteroglossus azara</i>             | 499  | 0.860 | 0.817 | 0.739 | 0.820 | 0.763 | 0.937 | 0.925 | 0.838 | 0.970 | 0.919 | 0.923 | 0.892 | 0.901 | 0.850 | 0.844 | RF     |
| Ramphastidae    | <i>Pteroglossus beauharnaesii</i>     | 265  | 0.889 | 0.851 | 0.824 | 0.837 | 0.805 | 0.953 | 0.938 | 0.962 | 0.943 | 1     | 0.934 | 0.913 | 0.862 | 0.894 | 0.805 | RF     |
| Ramphastidae    | <i>Pteroglossus castanotis</i>        | 1287 | 0.775 | 0.675 | 0.664 | 0.663 | 0.547 | 0.898 | 0.944 | 0.908 | 0.920 | 0.944 | 0.877 | 0.731 | 0.756 | 0.742 | 0.603 | RF     |
| Ramphastidae    | <i>Pteroglossus inscriptus</i>        | 496  | 0.814 | 0.824 | 0.749 | 0.783 | 0.801 | 0.922 | 0.977 | 0.979 | 0.958 | 0.895 | 0.892 | 0.847 | 0.770 | 0.826 | 0.907 | GBM    |
| Ramphastidae    | <i>Ramphastos tucanus</i>             | 2555 | 0.815 | 0.796 | 0.756 | 0.781 | 0.746 | 0.934 | 0.938 | 0.943 | 0.941 | 0.927 | 0.881 | 0.857 | 0.813 | 0.840 | 0.819 | RF     |
| Ramphastidae    | <i>Ramphastos vitellinus</i>          | 1703 | 0.761 | 0.672 | 0.629 | 0.683 | 0.634 | 0.887 | 0.841 | 0.768 | 0.934 | 0.831 | 0.874 | 0.830 | 0.860 | 0.751 | 0.803 | RF     |
| Ramphastidae    | <i>Selenidera reinwardtii</i>         | 598  | 0.868 | 0.845 | 0.761 | 0.776 | 0.742 | 0.944 | 0.962 | 0.958 | 0.924 | 0.856 | 0.924 | 0.883 | 0.803 | 0.852 | 0.886 | RF     |
| Steatornithidae | <i>Steatornis caripensis</i>          | 203  | 0.645 | 0.463 | 0.568 | 0.551 | 0.539 | 0.763 | 0.583 | 0.875 | 0.925 | 0.825 | 0.883 | 0.878 | 0.693 | 0.625 | 0.714 | RF     |
| Thraupidae      | <i>Anisognathus igniventris</i>       | 1405 | 0.841 | 0.769 | 0.706 | 0.699 | 0.698 | 0.911 | 0.901 | 0.898 | 0.814 | 0.938 | 0.929 | 0.868 | 0.807 | 0.886 | 0.760 | RF     |
| Thraupidae      | <i>Anisognathus somptuosus</i>        | 2194 | 0.855 | 0.765 | 0.748 | 0.717 | 0.676 | 0.915 | 0.867 | 0.896 | 0.863 | 0.866 | 0.939 | 0.897 | 0.851 | 0.854 | 0.809 | RF     |
| Thraupidae      | <i>Buthraupis montana</i>             | 995  | 0.834 | 0.768 | 0.696 | 0.747 | 0.667 | 0.913 | 0.942 | 0.878 | 0.919 | 0.873 | 0.921 | 0.826 | 0.816 | 0.828 | 0.793 | RF     |
| Thraupidae      | <i>Catamblyrhynchus diadema</i>       | 459  | 0.762 | 0.764 | 0.613 | 0.677 | 0.685 | 0.876 | 0.938 | 0.844 | 0.911 | 0.889 | 0.886 | 0.826 | 0.769 | 0.765 | 0.796 | GBM    |
| Thraupidae      | <i>Chlorochrysa calliparaea</i>       | 491  | 0.877 | 0.841 | 0.752 | 0.760 | 0.772 | 0.913 | 0.934 | 0.969 | 0.898 | 1     | 0.963 | 0.907 | 0.783 | 0.862 | 0.772 | RF     |
| Thraupidae      | <i>Chlorophanes spiza</i>             | 2100 | 0.772 | 0.684 | 0.599 | 0.579 | 0.564 | 0.888 | 0.861 | 0.949 | 0.915 | 0.866 | 0.883 | 0.823 | 0.650 | 0.663 | 0.698 | RF     |
| Thraupidae      | <i>Chlorophonia cyanea</i>            | 976  | 0.772 | 0.648 | 0.665 | 0.653 | 0.653 | 0.881 | 0.930 | 0.894 | 0.788 | 0.841 | 0.891 | 0.716 | 0.771 | 0.864 | 0.812 | RF     |
| Thraupidae      | <i>Chlorornis riefferii</i>           | 929  | 0.830 | 0.768 | 0.691 | 0.742 | 0.667 | 0.899 | 0.891 | 0.780 | 0.852 | 0.852 | 0.930 | 0.877 | 0.911 | 0.889 | 0.814 | RF     |
| Thraupidae      | <i>Chlorospingus canigularis</i>      | 487  | 0.821 | 0.787 | 0.644 | 0.609 | 0.565 | 0.910 | 0.918 | 0.969 | 0.948 | 0.781 | 0.910 | 0.868 | 0.675 | 0.660 | 0.783 | RF     |
| Thraupidae      | <i>Chlorospingus flavigularis</i>     | 1090 | 0.909 | 0.823 | 0.674 | 0.729 | 0.728 | 0.949 | 0.910 | 0.877 | 0.791 | 0.829 | 0.961 | 0.912 | 0.797 | 0.938 | 0.898 | RF     |
| Thraupidae      | <i>Chlorospingus ophthalmicus</i>     | 1665 | 0.826 | 0.649 | 0.543 | 0.579 | 0.491 | 0.892 | 0.900 | 0.823 | 0.856 | 0.878 | 0.934 | 0.749 | 0.720 | 0.726 | 0.613 | RF     |
| Thraupidae      | <i>Chlorospingus parvirostris</i>     | 193  | 0.826 | 0.826 | 0.727 | 0.685 | 0.598 | 0.921 | 0.938 | 0.949 | 0.897 | 0.821 | 0.905 | 0.887 | 0.778 | 0.787 | 0.776 | GBM    |
| Thraupidae      | <i>Cissopis leverianus</i>            | 1759 | 0.787 | 0.681 | 0.624 | 0.653 | 0.628 | 0.875 | 0.836 | 0.944 | 0.868 | 0.895 | 0.911 | 0.845 | 0.680 | 0.782 | 0.733 | RF     |
| Thraupidae      | <i>Conirostrum cinereum</i>           | 1979 | 0.799 | 0.735 | 0.653 | 0.679 | 0.546 | 0.883 | 0.884 | 0.885 | 0.813 | 0.932 | 0.915 | 0.851 | 0.767 | 0.865 | 0.613 | RF     |
| Thraupidae      | <i>Conirostrum speciosum</i>          | 553  | 0.710 | 0.661 | 0.604 | 0.581 | 0.493 | 0.806 | 0.920 | 0.848 | 0.981 | 0.924 | 0.904 | 0.741 | 0.755 | 0.598 | 0.569 | RF     |
| Thraupidae      | <i>Cyanerpes caeruleus</i>            | 1633 | 0.769 | 0.658 | 0.589 | 0.624 | 0.531 | 0.869 | 0.875 | 0.913 | 0.875 | 0.791 | 0.898 | 0.782 | 0.675 | 0.748 | 0.740 | RF     |
| Thraupidae      | <i>Cyanerpes cyaneus</i>              | 492  | 0.754 | 0.670 | 0.571 | 0.520 | 0.570 | 0.916 | 0.912 | 0.894 | 1     | 0.926 | 0.838 | 0.758 | 0.678 | 0.520 | 0.645 | RF     |
| Thraupidae      | <i>Dacnis cayana</i>                  | 2543 | 0.682 | 0.570 | 0.504 | 0.532 | 0.442 | 0.821 | 0.849 | 0.911 | 0.921 | 0.929 | 0.859 | 0.720 | 0.593 | 0.611 | 0.512 | RF     |
| Thraupidae      | <i>Dacnis flaviventer</i>             | 556  | 0.836 | 0.829 | 0.772 | 0.801 | 0.828 | 0.939 | 0.941 | 0.937 | 0.946 | 0.955 | 0.897 | 0.886 | 0.835 | 0.855 | 0.872 | RF     |

|            |                                     |      |       |       |       |       |       |       |       |       |       |       |       |       |       |       |       |        |
|------------|-------------------------------------|------|-------|-------|-------|-------|-------|-------|-------|-------|-------|-------|-------|-------|-------|-------|-------|--------|
| Thraupidae | <i>Dacnis lineata</i>               | 1418 | 0.766 | 0.720 | 0.601 | 0.598 | 0.629 | 0.858 | 0.893 | 0.888 | 0.870 | 0.775 | 0.908 | 0.825 | 0.713 | 0.727 | 0.853 | RF     |
| Thraupidae | <i>Delothraupis castaneiventris</i> | 238  | 0.804 | 0.732 | 0.720 | 0.763 | 0.631 | 0.904 | 0.938 | 0.915 | 0.872 | 0.851 | 0.900 | 0.794 | 0.806 | 0.891 | 0.780 | RF     |
| Thraupidae | <i>Diglossa brunneiventris</i>      | 851  | 0.823 | 0.794 | 0.703 | 0.674 | 0.634 | 0.937 | 0.963 | 0.888 | 0.905 | 0.858 | 0.885 | 0.831 | 0.815 | 0.768 | 0.777 | RF     |
| Thraupidae | <i>Diglossa caeruleascens</i>       | 633  | 0.802 | 0.742 | 0.624 | 0.643 | 0.634 | 0.931 | 0.938 | 0.848 | 0.808 | 0.896 | 0.870 | 0.804 | 0.775 | 0.835 | 0.736 | RF     |
| Thraupidae | <i>Diglossa cyanea</i>              | 2564 | 0.851 | 0.766 | 0.676 | 0.707 | 0.694 | 0.923 | 0.885 | 0.866 | 0.957 | 0.953 | 0.927 | 0.881 | 0.810 | 0.750 | 0.741 | RF     |
| Thraupidae | <i>Diglossa glauca</i>              | 282  | 0.858 | 0.871 | 0.848 | 0.827 | 0.813 | 0.938 | 0.965 | 0.927 | 0.927 | 0.964 | 0.920 | 0.905 | 0.920 | 0.900 | 0.849 | GBM    |
| Thraupidae | <i>Diglossa mystacalis</i>          | 283  | 0.832 | 0.786 | 0.674 | 0.609 | 0.750 | 0.913 | 0.904 | 0.964 | 0.821 | 0.875 | 0.919 | 0.881 | 0.709 | 0.788 | 0.875 | RF     |
| Thraupidae | <i>Diglossa sittoides</i>           | 680  | 0.721 | 0.607 | 0.513 | 0.545 | 0.534 | 0.886 | 0.854 | 0.858 | 0.799 | 0.806 | 0.835 | 0.753 | 0.655 | 0.746 | 0.728 | RF     |
| Thraupidae | <i>Dubusia taeniata</i>             | 416  | 0.806 | 0.748 | 0.760 | 0.677 | 0.730 | 0.917 | 0.952 | 0.951 | 0.878 | 0.890 | 0.889 | 0.795 | 0.809 | 0.798 | 0.840 | RF     |
| Thraupidae | <i>Euphonia chlorotica</i>          | 994  | 0.647 | 0.638 | 0.486 | 0.518 | 0.463 | 0.844 | 0.909 | 0.938 | 0.928 | 0.778 | 0.801 | 0.728 | 0.548 | 0.589 | 0.683 | RF     |
| Thraupidae | <i>Euphonia chrysopasta</i>         | 774  | 0.799 | 0.809 | 0.763 | 0.765 | 0.768 | 0.893 | 0.903 | 0.948 | 0.922 | 0.967 | 0.906 | 0.905 | 0.814 | 0.844 | 0.801 | GBM    |
| Thraupidae | <i>Euphonia laniirostris</i>        | 2821 | 0.738 | 0.601 | 0.411 | 0.487 | 0.331 | 0.826 | 0.823 | 0.698 | 0.704 | 0.582 | 0.911 | 0.776 | 0.712 | 0.783 | 0.749 | RF     |
| Thraupidae | <i>Euphonia mesochrysa</i>          | 348  | 0.794 | 0.697 | 0.653 | 0.614 | 0.638 | 0.899 | 0.836 | 0.914 | 0.886 | 0.914 | 0.893 | 0.861 | 0.739 | 0.728 | 0.724 | RF     |
| Thraupidae | <i>Euphonia minuta</i>              | 349  | 0.723 | 0.718 | 0.676 | 0.738 | 0.622 | 0.875 | 0.891 | 0.928 | 0.870 | 0.841 | 0.847 | 0.827 | 0.747 | 0.868 | 0.782 | MAXENT |
| Thraupidae | <i>Euphonia rufiventris</i>         | 716  | 0.830 | 0.805 | 0.813 | 0.813 | 0.736 | 0.914 | 0.904 | 0.930 | 0.965 | 0.894 | 0.915 | 0.901 | 0.883 | 0.846 | 0.842 | RF     |
| Thraupidae | <i>Euphonia xanthogaster</i>        | 3722 | 0.837 | 0.691 | 0.597 | 0.646 | 0.602 | 0.904 | 0.861 | 0.737 | 0.799 | 0.946 | 0.933 | 0.828 | 0.862 | 0.847 | 0.656 | RF     |
| Thraupidae | <i>Iridophanes pulcherrimus</i>     | 198  | 0.879 | 0.839 | 0.753 | 0.793 | 0.790 | 0.964 | 0.979 | 0.923 | 0.974 | 1     | 0.915 | 0.860 | 0.829 | 0.817 | 0.789 | RF     |
| Thraupidae | <i>Iridosornis analis</i>           | 268  | 0.841 | 0.765 | 0.778 | 0.808 | 0.723 | 0.919 | 0.911 | 0.962 | 0.962 | 0.887 | 0.922 | 0.852 | 0.815 | 0.845 | 0.836 | RF     |
| Thraupidae | <i>Iridosornis jelskii</i>          | 150  | 0.840 | 0.803 | 0.639 | 0.690 | 0.668 | 0.920 | 0.870 | 0.867 | 0.933 | 0.833 | 0.920 | 0.930 | 0.773 | 0.756 | 0.834 | RF     |
| Thraupidae | <i>Lamprospiza melanoleuca</i>      | 151  | 0.830 | 0.840 | 0.880 | 0.773 | 0.834 | 0.950 | 0.973 | 1     | 1     | 1     | 0.880 | 0.867 | 0.880 | 0.774 | 0.834 | GAM    |
| Thraupidae | <i>Pipraeidea melanonota</i>        | 1333 | 0.752 | 0.642 | 0.568 | 0.570 | 0.593 | 0.856 | 0.816 | 0.773 | 0.885 | 0.777 | 0.896 | 0.825 | 0.795 | 0.685 | 0.816 | RF     |
| Thraupidae | <i>Piranga leucoptera</i>           | 537  | 0.797 | 0.699 | 0.653 | 0.695 | 0.686 | 0.892 | 0.819 | 0.876 | 0.876 | 0.943 | 0.904 | 0.878 | 0.777 | 0.819 | 0.744 | RF     |
| Thraupidae | <i>Ramphocelus carbo</i>            | 5139 | 0.774 | 0.600 | 0.560 | 0.575 | 0.527 | 0.870 | 0.874 | 0.917 | 0.864 | 0.754 | 0.904 | 0.725 | 0.644 | 0.711 | 0.772 | RF     |
| Thraupidae | <i>Ramphocelus nigrogularis</i>     | 872  | 0.892 | 0.881 | 0.853 | 0.863 | 0.865 | 0.963 | 0.956 | 0.959 | 0.971 | 0.959 | 0.929 | 0.924 | 0.894 | 0.892 | 0.906 | RF     |
| Thraupidae | <i>Schistoclamys melanopis</i>      | 514  | 0.658 | 0.642 | 0.507 | 0.545 | 0.515 | 0.856 | 0.908 | 0.772 | 0.911 | 0.941 | 0.799 | 0.733 | 0.735 | 0.633 | 0.574 | RF     |
| Thraupidae | <i>Tachyphonus cristatus</i>        | 700  | 0.749 | 0.723 | 0.640 | 0.634 | 0.658 | 0.887 | 0.953 | 0.876 | 0.883 | 0.883 | 0.862 | 0.769 | 0.764 | 0.751 | 0.774 | RF     |
| Thraupidae | <i>Tachyphonus rufiventer</i>       | 201  | 0.763 | 0.763 | 0.692 | 0.630 | 0.609 | 0.870 | 0.938 | 0.900 | 0.925 | 0.975 | 0.893 | 0.823 | 0.791 | 0.705 | 0.634 | RF     |
| Thraupidae | <i>Tangara arthaus</i>              | 2792 | 0.890 | 0.794 | 0.672 | 0.711 | 0.679 | 0.935 | 0.924 | 0.796 | 0.918 | 0.767 | 0.955 | 0.869 | 0.876 | 0.794 | 0.911 | RF     |
| Thraupidae | <i>Tangara callophrys</i>           | 356  | 0.898 | 0.918 | 0.882 | 0.832 | 0.842 | 0.967 | 0.991 | 1     | 0.929 | 0.900 | 0.930 | 0.927 | 0.881 | 0.903 | 0.942 | GBM    |
| Thraupidae | <i>Tangara chilensis</i>            | 2072 | 0.812 | 0.720 | 0.654 | 0.687 | 0.605 | 0.912 | 0.895 | 0.820 | 0.908 | 0.813 | 0.900 | 0.824 | 0.835 | 0.780 | 0.792 | RF     |
| Thraupidae | <i>Tangara chrysotis</i>            | 315  | 0.865 | 0.830 | 0.748 | 0.735 | 0.760 | 0.938 | 0.924 | 1     | 0.968 | 0.952 | 0.925 | 0.906 | 0.749 | 0.767 | 0.808 | RF     |
| Thraupidae | <i>Tangara cyanicollis</i>          | 2781 | 0.828 | 0.700 | 0.631 | 0.686 | 0.629 | 0.901 | 0.867 | 0.855 | 0.832 | 0.856 | 0.927 | 0.832 | 0.776 | 0.854 | 0.772 | RF     |
| Thraupidae | <i>Tangara cyanotis</i>             | 104  | 0.800 | 0.800 | 0.812 | 0.752 | 0.758 | 0.929 | 0.910 | 1     | 1     | 0.905 | 0.871 | 0.890 | 0.812 | 0.751 | 0.853 | GAM    |
| Thraupidae | <i>Tangara gyrola</i>               | 3030 | 0.821 | 0.677 | 0.622 | 0.620 | 0.608 | 0.900 | 0.848 | 0.861 | 0.900 | 0.922 | 0.921 | 0.829 | 0.760 | 0.720 | 0.686 | RF     |
| Thraupidae | <i>Tangara mexicana</i>             | 1121 | 0.761 | 0.704 | 0.676 | 0.676 | 0.667 | 0.902 | 0.889 | 0.959 | 0.968 | 0.950 | 0.859 | 0.814 | 0.716 | 0.707 | 0.716 | RF     |
| Thraupidae | <i>Tangara nigrocincta</i>          | 477  | 0.792 | 0.737 | 0.696 | 0.731 | 0.587 | 0.900 | 0.885 | 0.853 | 0.916 | 0.905 | 0.892 | 0.849 | 0.843 | 0.816 | 0.681 | RF     |
| Thraupidae | <i>Tangara nigroviridis</i>         | 2226 | 0.877 | 0.731 | 0.733 | 0.784 | 0.690 | 0.930 | 0.877 | 0.859 | 0.895 | 0.893 | 0.946 | 0.853 | 0.874 | 0.889 | 0.798 | RF     |
| Thraupidae | <i>Tangara parzudakii</i>           | 1116 | 0.889 | 0.792 | 0.787 | 0.747 | 0.745 | 0.931 | 0.912 | 0.905 | 0.873 | 0.914 | 0.958 | 0.880 | 0.882 | 0.874 | 0.830 | RF     |
| Thraupidae | <i>Tangara punctata</i>             | 629  | 0.790 | 0.674 | 0.612 | 0.639 | 0.622 | 0.872 | 0.834 | 0.752 | 0.768 | 0.720 | 0.918 | 0.840 | 0.860 | 0.871 | 0.902 | RF     |
| Thraupidae | <i>Tangara ruficervix</i>           | 1112 | 0.877 | 0.816 | 0.749 | 0.782 | 0.727 | 0.925 | 0.916 | 0.886 | 0.891 | 0.864 | 0.952 | 0.900 | 0.863 | 0.889 | 0.863 | RF     |
| Thraupidae | <i>Tangara schrankii</i>            | 1400 | 0.856 | 0.800 | 0.727 | 0.719 | 0.677 | 0.932 | 0.955 | 0.896 | 0.892 | 0.928 | 0.923 | 0.845 | 0.832 | 0.827 | 0.749 | RF     |
| Thraupidae | <i>Tangara vassorii</i>             | 1355 | 0.825 | 0.720 | 0.675 | 0.662 | 0.658 | 0.887 | 0.904 | 0.926 | 0.941 | 0.926 | 0.937 | 0.815 | 0.749 | 0.721 | 0.732 | RF     |
| Thraupidae | <i>Tangara velia</i>                | 423  | 0.776 | 0.769 | 0.727 | 0.725 | 0.748 | 0.872 | 0.969 | 0.940 | 0.904 | 0.964 | 0.904 | 0.800 | 0.787 | 0.821 | 0.785 | RF     |
| Thraupidae | <i>Tangara viridicollis</i>         | 436  | 0.856 | 0.849 | 0.823 | 0.807 | 0.776 | 0.938 | 0.938 | 0.942 | 0.930 | 0.895 | 0.917 | 0.909 | 0.880 | 0.877 | 0.878 | RF     |
| Thraupidae | <i>Tangara xanthocephala</i>        | 1354 | 0.840 | 0.772 | 0.731 | 0.724 | 0.698 | 0.926 | 0.895 | 0.860 | 0.849 | 0.860 | 0.914 | 0.876 | 0.870 | 0.874 | 0.838 | RF     |
| Thraupidae | <i>Tangara xanthogastra</i>         | 509  | 0.803 | 0.771 | 0.712 | 0.716 | 0.650 | 0.893 | 0.881 | 0.949 | 0.818 | 0.798 | 0.910 | 0.890 | 0.763 | 0.897 | 0.852 | RF     |
| Thraupidae | <i>Tersina viridis</i>              | 2109 | 0.757 | 0.673 | 0.593 | 0.635 | 0.601 | 0.864 | 0.902 | 0.881 | 0.873 | 0.908 | 0.893 | 0.771 | 0.713 | 0.762 | 0.693 | RF     |
| Thraupidae | <i>Thlyopsis sordida</i>            | 418  | 0.630 | 0.609 | 0.503 | 0.432 | 0.492 | 0.872 | 0.896 | 0.861 | 0.886 | 0.937 | 0.758 | 0.711 | 0.641 | 0.546 | 0.554 | RF     |
| Thraupidae | <i>Thraupis bonariensis</i>         | 1634 | 0.747 | 0.612 | 0.550 | 0.606 | 0.562 | 0.870 | 0.892 | 0.830 | 0.886 | 0.839 | 0.876 | 0.720 | 0.721 | 0.720 | 0.723 | RF     |
| Thraupidae | <i>Thraupis cyanocephala</i>        | 1810 | 0.816 | 0.706 | 0.625 | 0.671 | 0.598 | 0.884 | 0.884 | 0.916 | 0.876 | 0.955 | 0.933 | 0.821 | 0.709 | 0.795 | 0.643 | RF     |

|            |                                  |      |       |       |       |       |       |       |       |       |       |       |       |       |       |       |       |     |
|------------|----------------------------------|------|-------|-------|-------|-------|-------|-------|-------|-------|-------|-------|-------|-------|-------|-------|-------|-----|
| Thraupidae | <i>Thraupis episcopus</i>        | 9138 | 0.750 | 0.507 | 0.370 | 0.456 | 0.369 | 0.832 | 0.768 | 0.697 | 0.729 | 0.622 | 0.918 | 0.738 | 0.674 | 0.727 | 0.746 | RF  |
| Thraupidae | <i>Thraupis palmarum</i>         | 6090 | 0.730 | 0.566 | 0.484 | 0.506 | 0.464 | 0.836 | 0.871 | 0.830 | 0.935 | 0.813 | 0.893 | 0.694 | 0.653 | 0.572 | 0.649 | RF  |
| Thraupidae | <i>Trichothraupis melanops</i>   | 1032 | 0.861 | 0.777 | 0.754 | 0.775 | 0.739 | 0.938 | 0.930 | 0.922 | 0.887 | 0.877 | 0.922 | 0.846 | 0.831 | 0.888 | 0.862 | RF  |
| Tinamidae  | <i>Crypturellus atrocapillus</i> | 275  | 0.869 | 0.876 | 0.776 | 0.773 | 0.720 | 0.904 | 0.965 | 0.945 | 0.836 | 0.836 | 0.965 | 0.911 | 0.831 | 0.936 | 0.884 | GBM |
| Tinamidae  | <i>Crypturellus bartletti</i>    | 282  | 0.914 | 0.902 | 0.878 | 0.875 | 0.868 | 0.964 | 0.964 | 1     | 0.929 | 0.964 | 0.950 | 0.938 | 0.878 | 0.947 | 0.904 | RF  |
| Tinamidae  | <i>Crypturellus cinereus</i>     | 925  | 0.854 | 0.812 | 0.794 | 0.814 | 0.757 | 0.938 | 0.935 | 0.923 | 0.945 | 0.945 | 0.915 | 0.876 | 0.871 | 0.870 | 0.813 | RF  |
| Tinamidae  | <i>Crypturellus obsoletus</i>    | 663  | 0.775 | 0.627 | 0.572 | 0.621 | 0.578 | 0.881 | 0.872 | 0.879 | 0.924 | 0.871 | 0.894 | 0.754 | 0.693 | 0.696 | 0.706 | RF  |
| Tinamidae  | <i>Crypturellus soui</i>         | 1834 | 0.750 | 0.654 | 0.585 | 0.562 | 0.605 | 0.857 | 0.870 | 0.864 | 0.756 | 0.861 | 0.893 | 0.784 | 0.720 | 0.805 | 0.742 | RF  |
| Tinamidae  | <i>Crypturellus strigulosus</i>  | 112  | 0.855 | 0.832 | 0.842 | 0.725 | 0.821 | 0.955 | 0.973 | 0.955 | 0.955 | 1     | 0.900 | 0.859 | 0.887 | 0.769 | 0.822 | RF  |
| Tinamidae  | <i>Crypturellus undulatus</i>    | 1657 | 0.840 | 0.743 | 0.749 | 0.767 | 0.709 | 0.901 | 0.937 | 0.944 | 0.904 | 0.963 | 0.939 | 0.805 | 0.805 | 0.864 | 0.747 | RF  |
| Tinamidae  | <i>Crypturellus variegatus</i>   | 447  | 0.825 | 0.816 | 0.782 | 0.763 | 0.732 | 0.915 | 0.969 | 0.955 | 0.876 | 0.933 | 0.910 | 0.847 | 0.827 | 0.887 | 0.800 | RF  |
| Tinamidae  | <i>Nothocercus nigrocipillus</i> | 122  | 0.829 | 0.767 | 0.762 | 0.748 | 0     | 0.929 | 0.942 | 1     | 1     | 0     | 0.900 | 0.825 | 0     | 0.748 | 0     | RF  |
| Tinamidae  | <i>Tinamus guttatus</i>          | 300  | 0.882 | 0.822 | 0.825 | 0.880 | 0.836 | 0.958 | 0.925 | 0.933 | 0.983 | 0.983 | 0.923 | 0.895 | 0.891 | 0.896 | 0.853 | RF  |
| Tinamidae  | <i>Tinamus major</i>             | 1034 | 0.807 | 0.776 | 0.768 | 0.772 | 0.748 | 0.877 | 0.888 | 0.975 | 0.871 | 0.876 | 0.929 | 0.888 | 0.793 | 0.901 | 0.872 | RF  |
| Tinamidae  | <i>Tinamus tao</i>               | 255  | 0.783 | 0.789 | 0.664 | 0.651 | 0.644 | 0.934 | 0.940 | 0.940 | 0.840 | 0.880 | 0.849 | 0.849 | 0.724 | 0.809 | 0.764 | GBM |
| Trogonidae | <i>Pharomachrus antisianus</i>   | 564  | 0.823 | 0.802 | 0.756 | 0.775 | 0.763 | 0.904 | 0.892 | 0.881 | 0.927 | 0.936 | 0.919 | 0.910 | 0.876 | 0.847 | 0.826 | RF  |
| Trogonidae | <i>Pharomachrus auriceps</i>     | 1413 | 0.864 | 0.804 | 0.712 | 0.735 | 0.738 | 0.924 | 0.913 | 0.867 | 0.885 | 0.867 | 0.939 | 0.891 | 0.845 | 0.850 | 0.871 | RF  |
| Trogonidae | <i>Pharomachrus pavoninus</i>    | 222  | 0.866 | 0.798 | 0.797 | 0.736 | 0.738 | 0.948 | 0.870 | 0.909 | 0.841 | 0.909 | 0.918 | 0.927 | 0.888 | 0.895 | 0.829 | RF  |
| Trogonidae | <i>Trogon collaris</i>           | 1355 | 0.779 | 0.671 | 0.592 | 0.575 | 0.554 | 0.896 | 0.857 | 0.848 | 0.726 | 0.760 | 0.882 | 0.813 | 0.744 | 0.849 | 0.793 | RF  |
| Trogonidae | <i>Trogon curucui</i>            | 1157 | 0.770 | 0.714 | 0.647 | 0.586 | 0.539 | 0.883 | 0.914 | 0.912 | 0.820 | 0.939 | 0.886 | 0.801 | 0.734 | 0.766 | 0.600 | RF  |
| Trogonidae | <i>Trogon melanurus</i>          | 1422 | 0.802 | 0.752 | 0.730 | 0.744 | 0.717 | 0.918 | 0.894 | 0.910 | 0.914 | 0.953 | 0.883 | 0.858 | 0.819 | 0.830 | 0.764 | RF  |
| Trogonidae | <i>Trogon personatus</i>         | 1686 | 0.818 | 0.767 | 0.592 | 0.682 | 0.628 | 0.892 | 0.879 | 0.722 | 0.784 | 0.808 | 0.926 | 0.888 | 0.869 | 0.897 | 0.820 | RF  |
| Trogonidae | <i>Trogon violaceus</i>          | 222  | 0.729 | 0.734 | 0.693 | 0.648 | 0.718 | 0.923 | 0.955 | 0.864 | 0.864 | 0.977 | 0.807 | 0.780 | 0.828 | 0.785 | 0.740 | GBM |
| Trogonidae | <i>Trogon viridis</i>            | 1592 | 0.752 | 0.696 | 0.636 | 0.631 | 0.666 | 0.883 | 0.912 | 0.871 | 0.852 | 0.868 | 0.868 | 0.784 | 0.765 | 0.778 | 0.798 | RF  |
| Turdidae   | <i>Catharus fuscafer</i>         | 380  | 0.802 | 0.745 | 0.678 | 0.600 | 0.619 | 0.885 | 0.873 | 0.838 | 0.797 | 0.784 | 0.917 | 0.872 | 0.839 | 0.802 | 0.835 | RF  |
| Turdidae   | <i>Entomodestes leucotis</i>     | 334  | 0.799 | 0.752 | 0.705 | 0.708 | 0.651 | 0.890 | 0.888 | 0.925 | 0.925 | 0.955 | 0.909 | 0.864 | 0.780 | 0.782 | 0.695 | RF  |
| Turdidae   | <i>Myadestes ralloides</i>       | 2199 | 0.885 | 0.744 | 0.672 | 0.685 | 0.651 | 0.934 | 0.885 | 0.848 | 0.841 | 0.823 | 0.951 | 0.859 | 0.827 | 0.842 | 0.827 | RF  |
| Turdidae   | <i>Turdus albicollis</i>         | 1473 | 0.768 | 0.695 | 0.532 | 0.584 | 0.550 | 0.868 | 0.856 | 0.783 | 0.838 | 0.752 | 0.899 | 0.837 | 0.749 | 0.746 | 0.798 | RF  |
| Turdidae   | <i>Turdus flaviventer</i>        | 2306 | 0.786 | 0.664 | 0.585 | 0.640 | 0.574 | 0.900 | 0.944 | 0.951 | 0.881 | 0.945 | 0.885 | 0.720 | 0.634 | 0.756 | 0.629 | RF  |
| Turdidae   | <i>Turdus fuscafer</i>           | 4362 | 0.813 | 0.700 | 0.594 | 0.624 | 0.636 | 0.882 | 0.881 | 0.895 | 0.829 | 0.940 | 0.930 | 0.819 | 0.699 | 0.795 | 0.696 | RF  |
| Turdidae   | <i>Turdus haurxwelli</i>         | 577  | 0.850 | 0.833 | 0.822 | 0.828 | 0.746 | 0.912 | 0.908 | 0.922 | 0.930 | 0.870 | 0.937 | 0.925 | 0.900 | 0.898 | 0.877 | RF  |
| Turdidae   | <i>Turdus ignobilis</i>          | 3427 | 0.790 | 0.661 | 0.642 | 0.625 | 0.623 | 0.877 | 0.877 | 0.839 | 0.771 | 0.805 | 0.912 | 0.784 | 0.803 | 0.854 | 0.817 | RF  |
| Turdidae   | <i>Turdus leucops</i>            | 270  | 0.819 | 0.774 | 0.645 | 0.747 | 0.661 | 0.904 | 0.854 | 0.833 | 0.963 | 0.926 | 0.913 | 0.920 | 0.811 | 0.784 | 0.735 | RF  |
| Turdidae   | <i>Turdus nigriceps</i>          | 270  | 0.755 | 0.679 | 0.657 | 0.542 | 0.597 | 0.849 | 0.882 | 0.922 | 0.980 | 0.882 | 0.902 | 0.796 | 0.736 | 0.561 | 0.715 | RF  |
| Turdidae   | <i>Turdus serranus</i>           | 1312 | 0.786 | 0.730 | 0.656 | 0.686 | 0.637 | 0.883 | 0.904 | 0.808 | 0.866 | 0.862 | 0.903 | 0.826 | 0.846 | 0.820 | 0.775 | RF  |
| Tyrannidae | <i>Elaenia albiceps</i>          | 4855 | 0.783 | 0.635 | 0.550 | 0.634 | 0.543 | 0.886 | 0.883 | 0.916 | 0.869 | 0.829 | 0.896 | 0.752 | 0.635 | 0.766 | 0.714 | RF  |
| Tyrannidae | <i>Elaenia flavogaster</i>       | 2433 | 0.641 | 0.479 | 0.417 | 0.404 | 0.433 | 0.754 | 0.865 | 0.868 | 0.895 | 0.935 | 0.887 | 0.613 | 0.550 | 0.509 | 0.498 | RF  |
| Tyrannidae | <i>Elaenia gigas</i>             | 291  | 0.837 | 0.694 | 0.723 | 0.721 | 0.726 | 0.926 | 0.854 | 0.825 | 0.895 | 0.860 | 0.910 | 0.840 | 0.898 | 0.823 | 0.866 | RF  |
| Tyrannidae | <i>Elaenia obscura</i>           | 374  | 0.703 | 0.750 | 0.599 | 0.641 | 0.596 | 0.847 | 0.908 | 0.889 | 0.903 | 0.903 | 0.856 | 0.841 | 0.711 | 0.738 | 0.693 | GBM |
| Tyrannidae | <i>Elaenia pallatangae</i>       | 772  | 0.786 | 0.718 | 0.576 | 0.670 | 0.623 | 0.886 | 0.878 | 0.883 | 0.857 | 0.929 | 0.900 | 0.836 | 0.693 | 0.812 | 0.693 | RF  |
| Tyrannidae | <i>Lophotriccus pileatus</i>     | 1337 | 0.858 | 0.772 | 0.639 | 0.712 | 0.621 | 0.930 | 0.905 | 0.840 | 0.938 | 0.907 | 0.927 | 0.868 | 0.798 | 0.775 | 0.714 | RF  |
| Tyrannidae | <i>Mionectes macconnelli</i>     | 306  | 0.782 | 0.694 | 0.721 | 0.651 | 0.643 | 0.917 | 0.858 | 0.883 | 0.817 | 0.867 | 0.866 | 0.836 | 0.838 | 0.833 | 0.776 | RF  |
| Tyrannidae | <i>Mionectes oleagineus</i>      | 1767 | 0.779 | 0.713 | 0.661 | 0.595 | 0.676 | 0.874 | 0.909 | 0.873 | 0.746 | 0.870 | 0.905 | 0.803 | 0.788 | 0.849 | 0.806 | RF  |
| Tyrannidae | <i>Mionectes olivaceus</i>       | 1252 | 0.834 | 0.725 | 0.655 | 0.660 | 0.549 | 0.917 | 0.854 | 0.951 | 0.827 | 0.646 | 0.916 | 0.870 | 0.704 | 0.831 | 0.902 | RF  |
| Tyrannidae | <i>Mionectes striaticollis</i>   | 1558 | 0.813 | 0.722 | 0.629 | 0.664 | 0.661 | 0.890 | 0.868 | 0.840 | 0.918 | 0.830 | 0.922 | 0.854 | 0.788 | 0.744 | 0.831 | RF  |
| Tyrannidae | <i>Zimmerius bolivianus</i>      | 197  | 0.869 | 0.831 | 0.694 | 0.649 | 0.683 | 0.936 | 0.959 | 1     | 0.897 | 0.846 | 0.933 | 0.872 | 0.694 | 0.752 | 0.837 | RF  |
| Tyrannidae | <i>Zimmerius gracilipes</i>      | 519  | 0.786 | 0.763 | 0.762 | 0.696 | 0.746 | 0.926 | 0.900 | 0.912 | 0.833 | 0.922 | 0.860 | 0.863 | 0.850 | 0.863 | 0.825 | RF  |



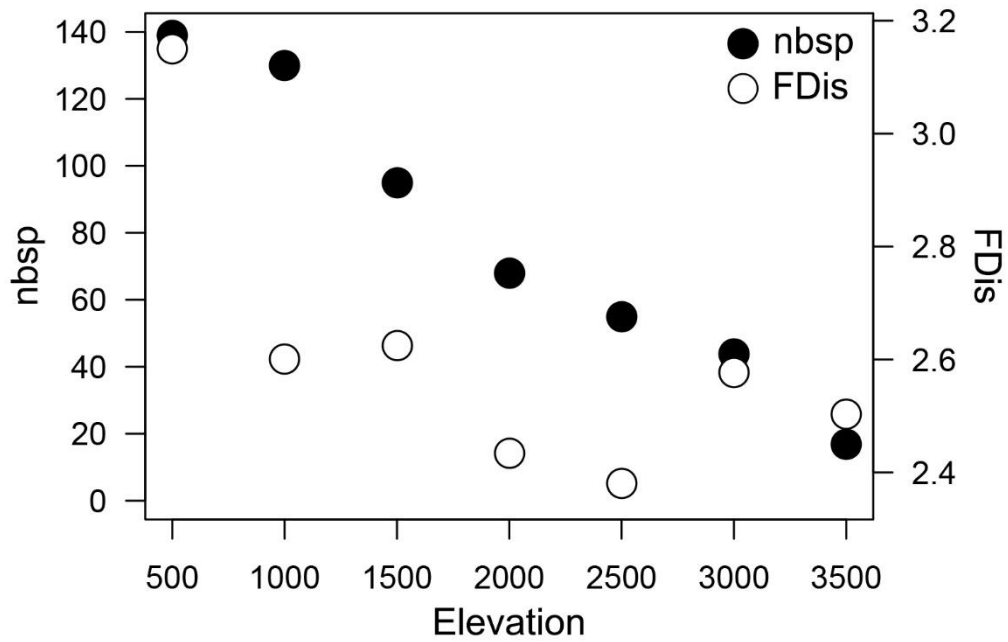

**Figure S1.** Species richness and functional dispersion under current conditions along the forested part of an elevational gradient in the Peruvian Andes. Current values of species richness (nbsp, closed circles) and functional dispersion (FDis, open circles) of bird assemblages ( $n = 232$  species) do not show a statistically significant correlation (Pearson  $r = 0.54$ ,  $P = 0.21$ ).

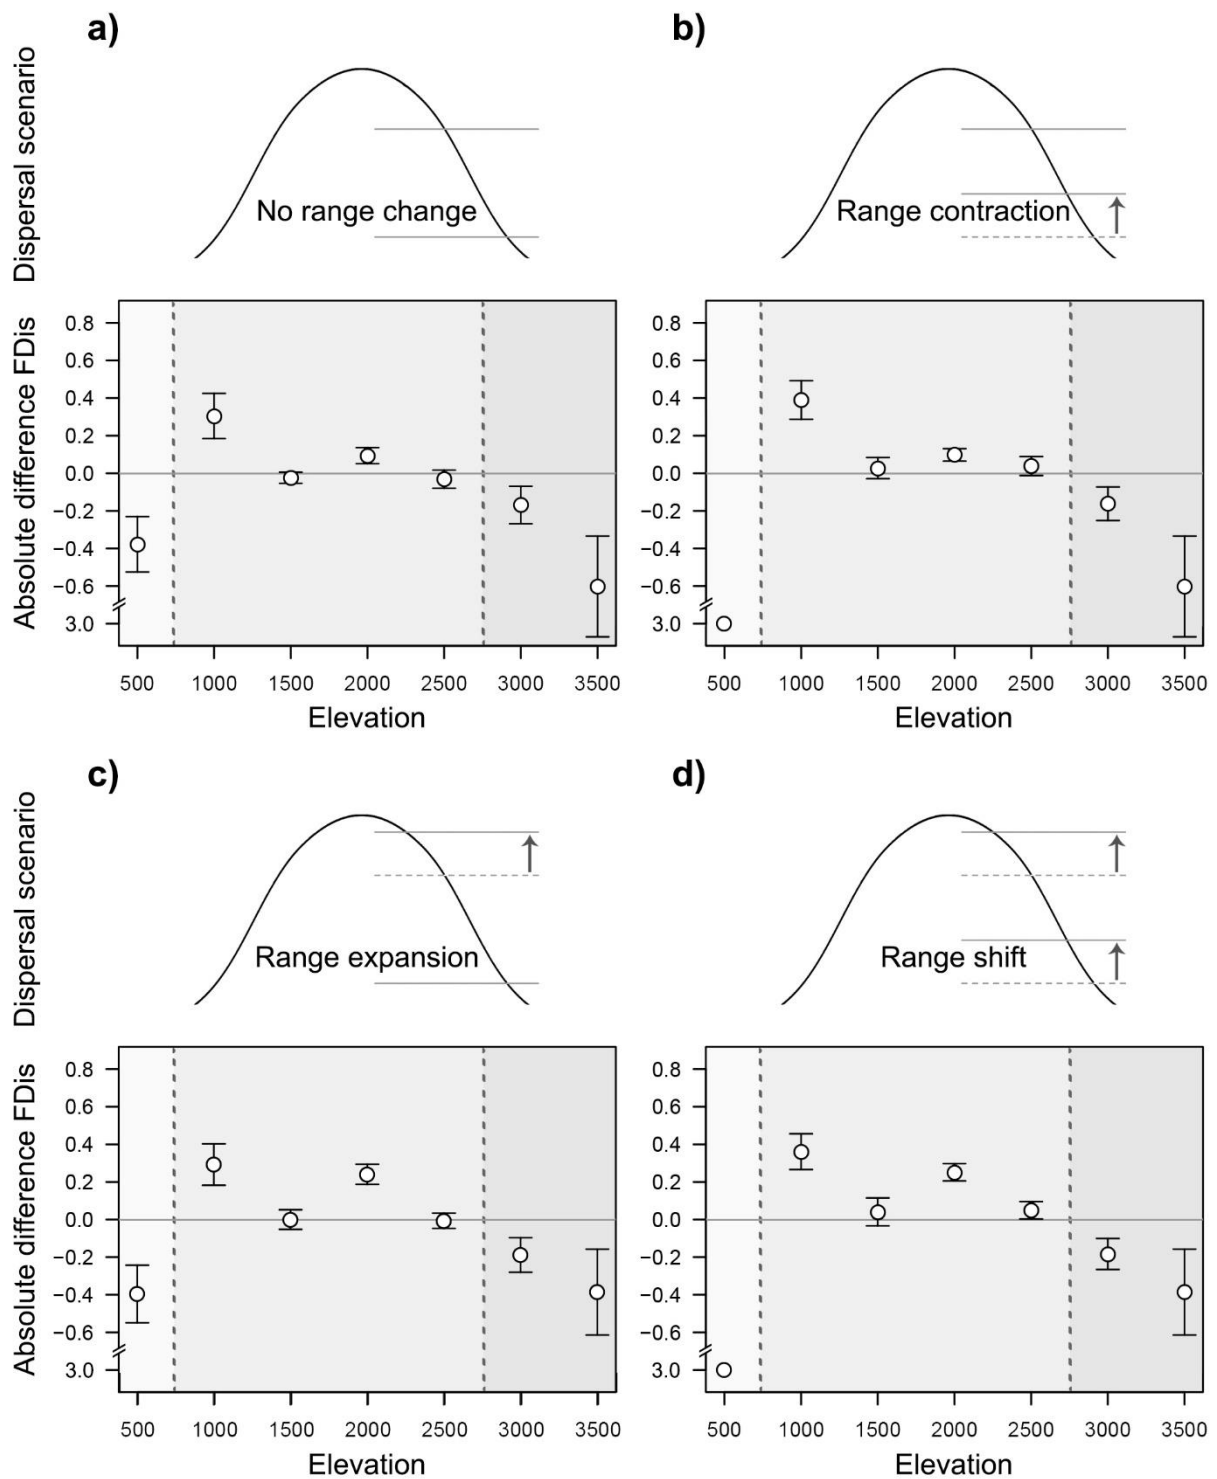

**Figure S2.** Potential changes in functional dispersion (FDIs) of bird assemblages under projected future climate change (based on the RCP 6.0 scenario). Shown are four potential dispersal scenarios representing (a) *no range change*, (b) *range contraction* (lower range limit moves upwards), (c) *range expansion* (upper range limit moves upwards), and (d) *range shift* (both lower and upper range limit move upwards), with the lower panels showing the

projected absolute changes in FDis, for each of seven elevational levels, representing a gradient from 500 m to 3500 m (at 500 m intervals). Absolute changes in FDis are based on species distribution models (SDMs) of 232 birds under current and projected future climate change scenarios using representative concentration pathway RCP 8.5 and the respective dispersal scenario. The values represent mean and standard deviation of the results derived from five general circulation models (CC, HE, MC, MG, NO). FDis calculations were derived from the first five PCoA axes, computed from ten morphological bird traits and are based on the SDM-derived probability of occurrence of bird species. Positive FDis values indicate an increase of FDis under climate change, and negative values a decrease. Projected future assemblages at 500 m were completely depleted of species under range contraction and shift scenarios.



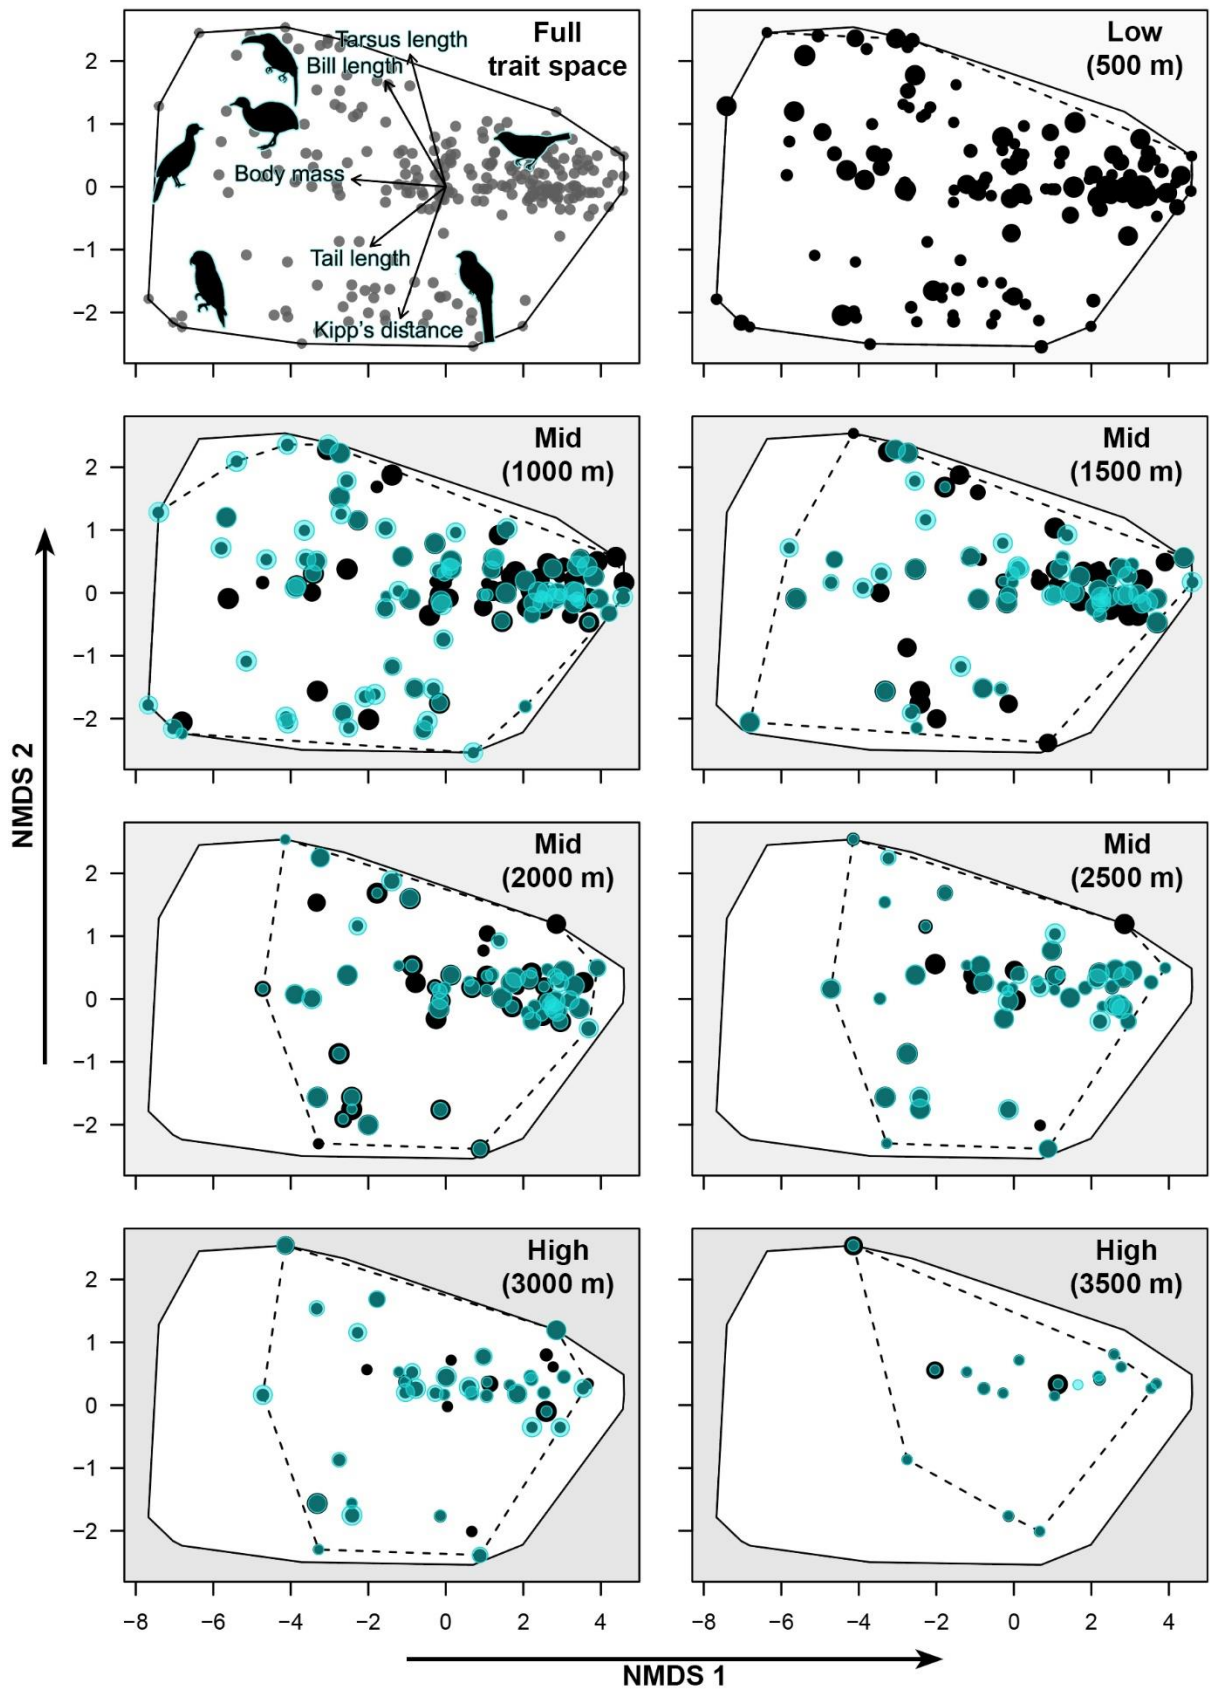

**Figure S3.** Projected changes in functional trait spaces of frugivorous bird assemblages under climate change assuming a *range contraction scenario*. The functional trait space is derived

from Nonmetric Multidimensional Scaling (NMDS, based on Euclidean distances) which condenses the dissimilarity of the first five PCoA axes, computed from ten morphological bird traits (bill width, bill length, bill height, tail length, tarsus length, tarsus sagittal width, tarsus lateral width, wing length, Kipp's distance and body mass) onto two axes for visualization (NMDS 1, NMDS 2). Trait spaces are shown for the entire bird assemblage (upper left) and for assemblages on each of the seven elevational levels (500 m to 3500 m, at 500 m intervals). Black polygons illustrate the functional trait space of the entire bird assemblage. Black stippled polygons illustrate the functional trait space of the current local assemblage at the given elevation. Each dot represents one bird species ( $n = 232$ ). Within each elevational level, dot size represents the probability of occurrence as derived from SDMs. Black dots represent current assemblages, transparent green dots represent occurrence probabilities under projected climate change (based on the RCP 8.5 scenario for 2080, MIROC5 climate model). Species-level changes are visible in four ways: (1) complete black dots indicate future loss of species, (2) complete light green dots indicate future immigration of species, (3) dark green dots with a black ring indicate future decline in occurrence probability, and (4) dark green dots with a light green ring indicate future increase in occurrence probability. Bird silhouettes in the upper left panel indicate the approximate location of key taxonomic groups in trait space (counterclockwise from top): toucans, tinamous, guans, parrots, trogons and tanagers. Fitted trait arrows indicate the relationship between five morphological bird traits (representing the different types of traits) and the ordination axes.

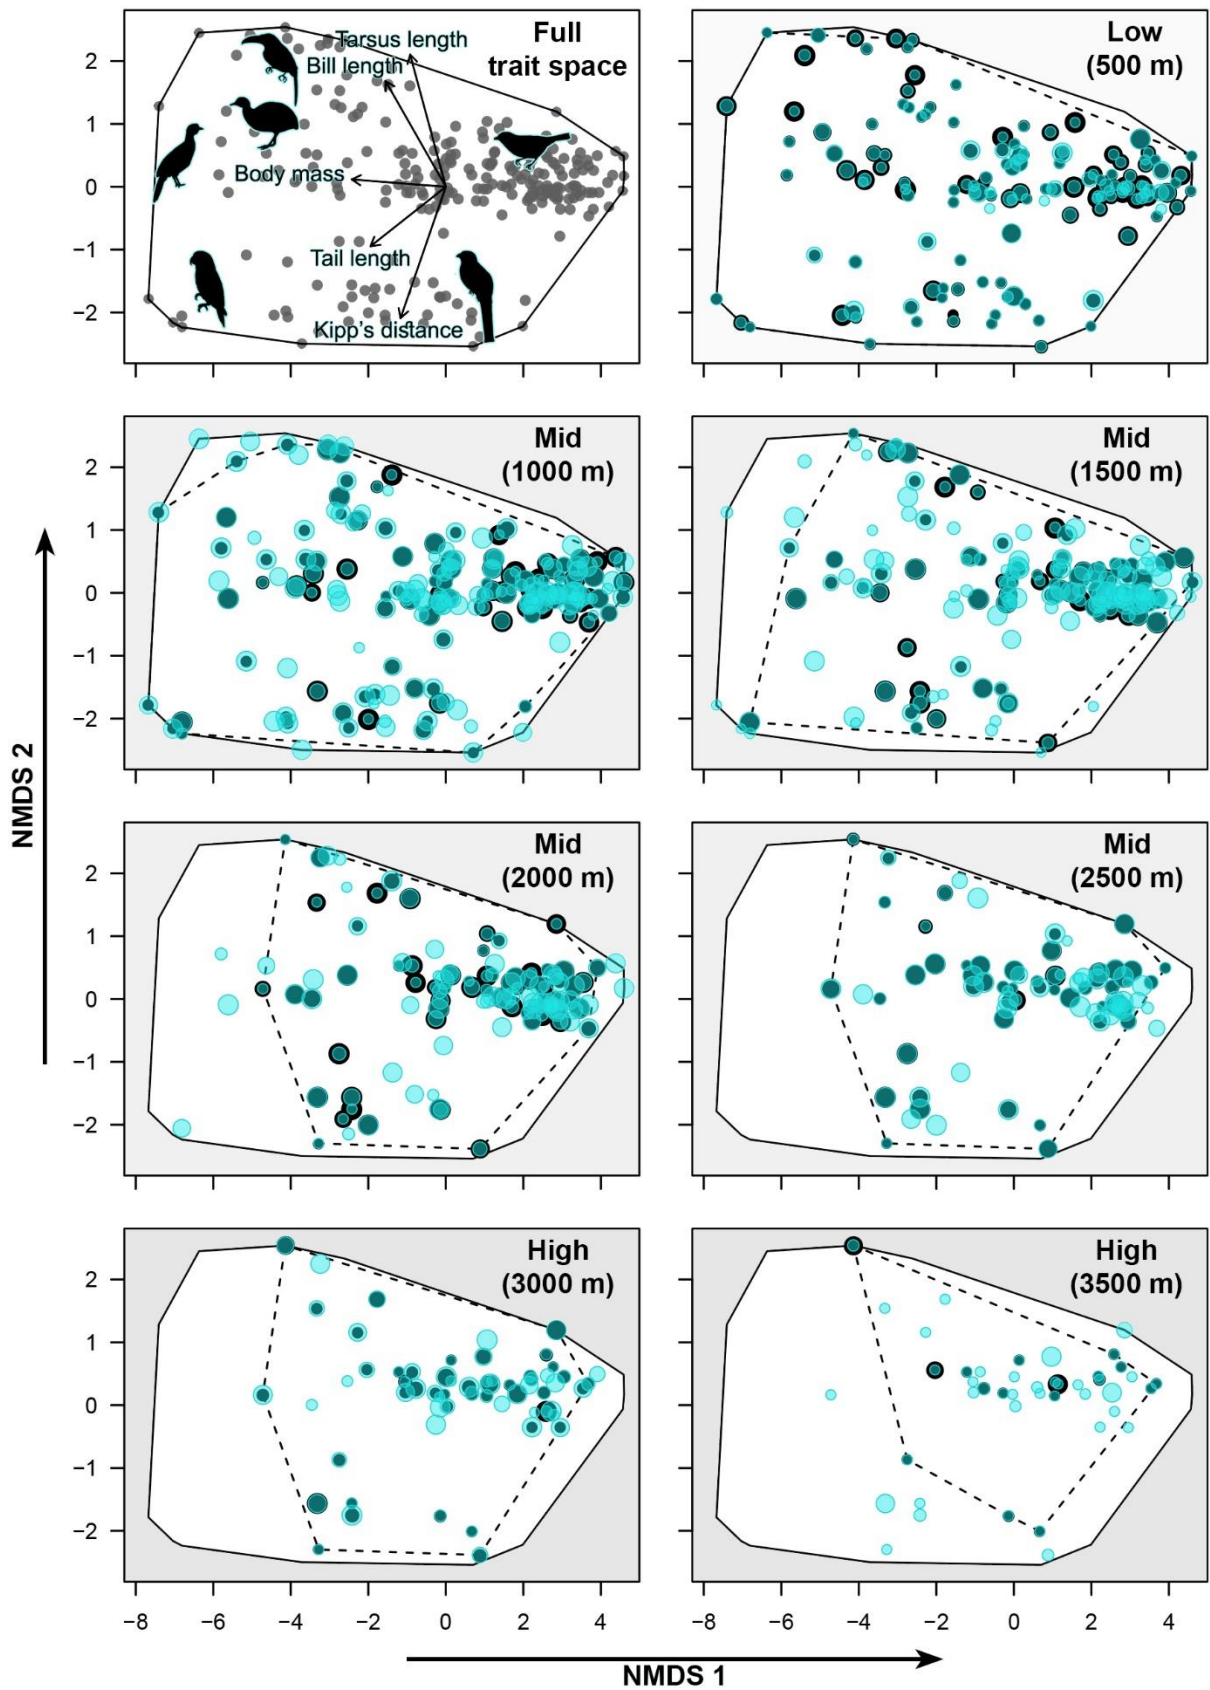

**Figure S4.** Projected changes in functional trait spaces of frugivorous bird assemblages under climate change assuming a *range expansion scenario*. The functional trait space is derived

from Nonmetric Multidimensional Scaling (NMDS, based on Euclidean distances) which condenses the dissimilarity of the first five PCoA axes, computed from ten morphological bird traits (bill width, bill length, bill height, tail length, tarsus length, tarsus sagittal width, tarsus lateral width, wing length, Kipp's distance and body mass) onto two axes for visualization (NMDS 1, NMDS 2). Trait spaces are shown for the entire bird assemblage (upper left) and for assemblages on each of the seven elevational levels (500 m to 3500 m, at 500 m intervals). Black polygons illustrate the functional trait space of the entire bird assemblage. Black stippled polygons illustrate the functional trait space of the current local assemblage at the given elevation. Each dot represents one bird species ( $n = 232$ ). Within each elevational level, dot size represents the probability of occurrence as derived from SDMs. Black dots represent current assemblages, transparent green dots represent occurrence probabilities under projected climate change (based on the RCP 8.5 scenario for 2080, MIROC5 climate model). Species-level changes are visible in four ways: (1) complete black dots indicate future loss of species, (2) complete light green dots indicate future immigration of species, (3) dark green dots with a black ring indicate future decline in occurrence probability, and (4) dark green dots with a light green ring indicate future increase in occurrence probability. Bird silhouettes in the upper left panel indicate the approximate location of key taxonomic groups in trait space (counterclockwise from top): toucans, tinamous, guans, parrots, trogons and tanagers. Fitted trait arrows indicate the relationship between five morphological bird traits (representing the different types of traits) and the ordination axes.

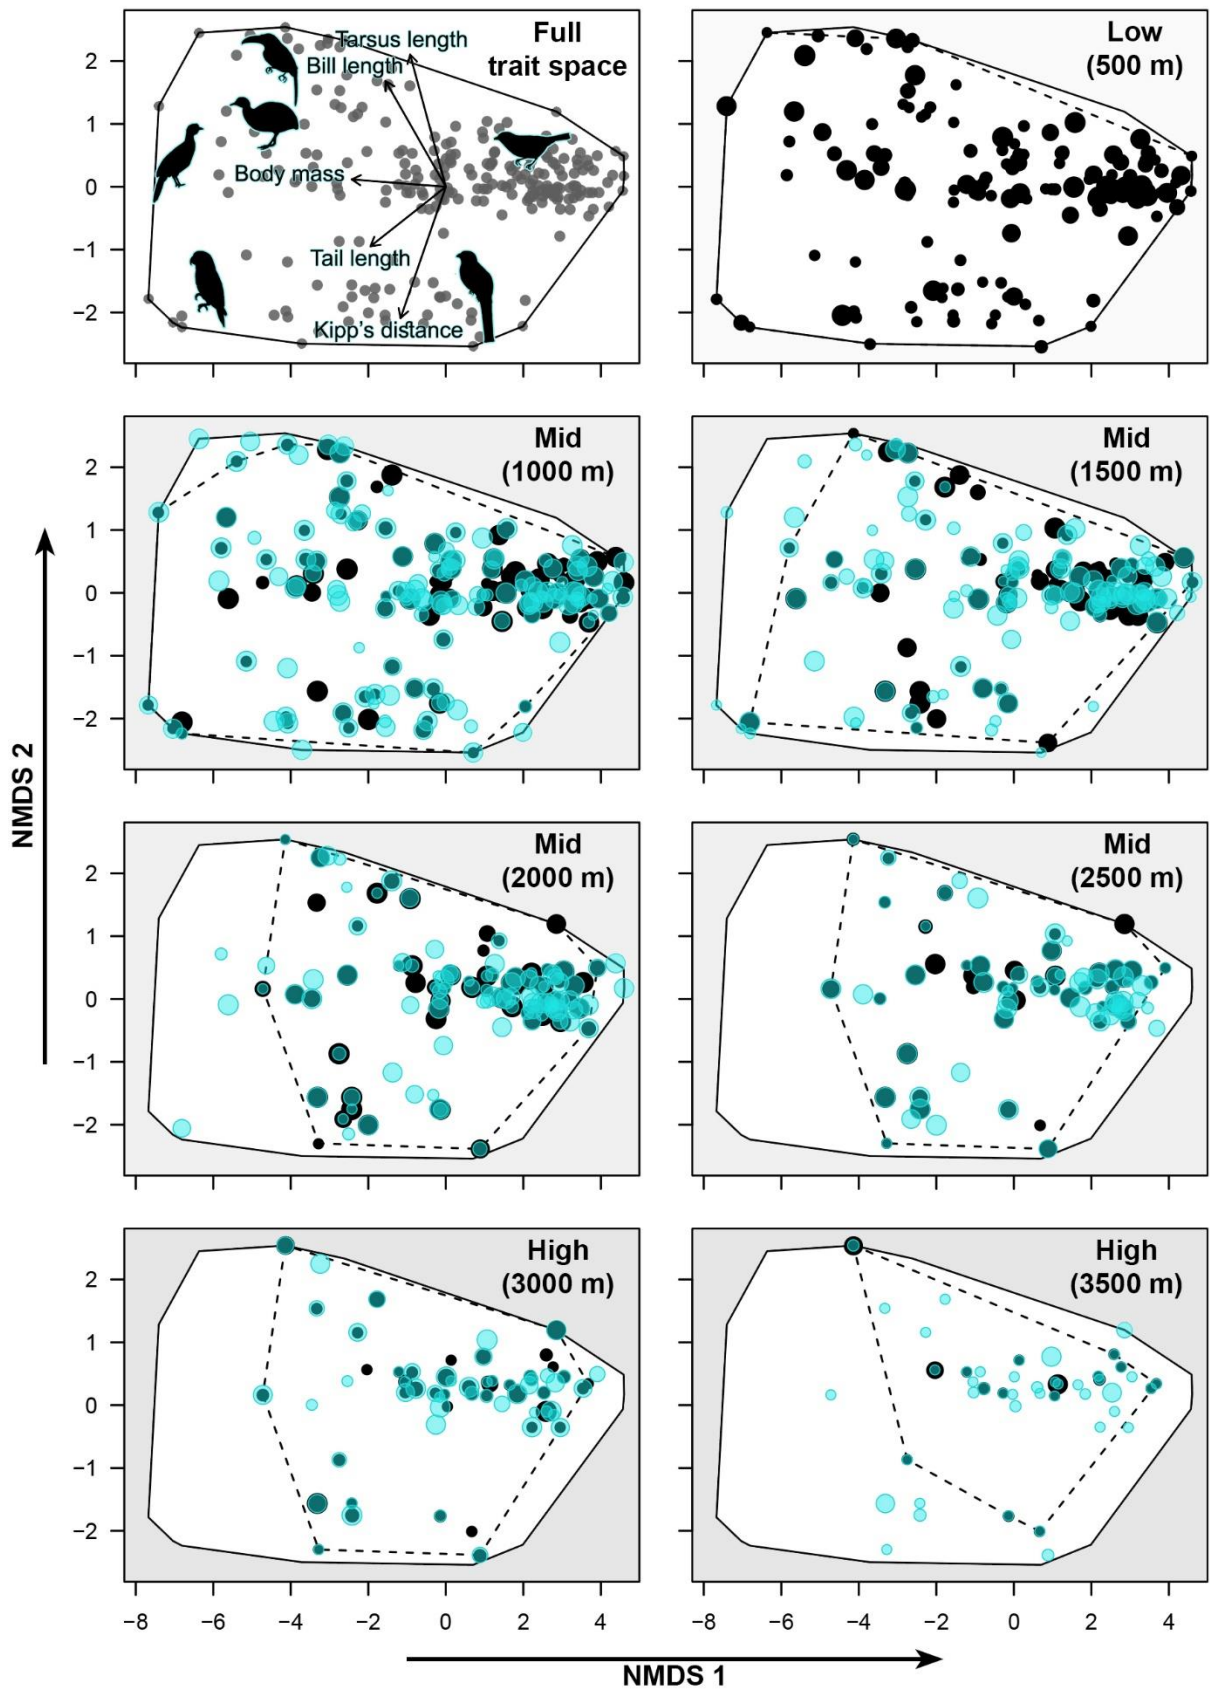

**Figure S5.** Projected changes in functional trait spaces of frugivorous bird assemblages under climate change assuming a *range shift scenario*. The functional trait space is derived from

Nonmetric Multidimensional Scaling (NMDS, based on Euclidean distances) which condenses the dissimilarity of the first five PCoA axes, computed from ten morphological bird traits (bill width, bill length, bill height, tail length, tarsus length, tarsus sagittal width, tarsus lateral width, wing length, Kipp's distance and body mass) onto two axes for visualization (NMDS 1, NMDS 2). Trait spaces are shown for the entire bird assemblage (upper left) and for assemblages on each of the seven elevational levels (500 m to 3500 m, at 500 m intervals). Black polygons illustrate the functional trait space of the entire bird assemblage. Black stippled polygons illustrate the functional trait space of the current local assemblage at the given elevation. Each dot represents one bird species ( $n = 232$ ). Within each elevational level, dot size represents the probability of occurrence as derived from SDMs. Black dots represent current assemblages, transparent green dots represent occurrence probabilities under projected climate change (based on the RCP 8.5 scenario for 2080, MIROC5 climate model). Species-level changes are visible in four ways: (1) complete black dots indicate future loss of species, (2) complete light green dots indicate future immigration of species, (3) dark green dots with a black ring indicate future decline in occurrence probability, and (4) dark green dots with a light green ring indicate future increase in occurrence probability. Bird silhouettes in the upper left panel indicate the approximate location of key taxonomic groups in trait space (counterclockwise from top): toucans, tinamous, guans, parrots, trogons and tanagers. Fitted trait arrows indicate the relationship between five morphological bird traits (representing the different types of traits) and the ordination axes.
